# Supplementary material
Source: publisher figshare collection journal article supplement (https://springernature.figshare.com/ndownloader/files/17990687)
Supplement: Supplementary file 1 [file 17990687]

## Sheet: Appendix B_Hartmann et al_V2
	Number	Authors	Title	Year	Source.title	Volume	Issue	Art..No.	Page.start	Page.end	Page.count	Cited.by	DOI	Link	Document.Type	Access.Type	Source	Abstract	text	sentences	EID	Signal Y/N?	MB/CH	Why?
3334	2704	Ji, Y.-P., Wang, G.-L.	Final Disappearing Process of Ancient Lake during Quaternary in Nihewan Basin	2017	Acta Geoscientica Sinica	38	NA	NA	38	42	NA	NA	10.3975/cagsb.2017.s1.11	https://www.scopus.com/inward/record.url?eid=2-s2.0-85042597559&partnerID=40&md5=ff92d79ffeb2c585c46b7bb562f954ff	Article	NA	Scopus	Â© 2017, Science Press. All right reserved. Nihewan Basin located in the northwestern of Hebei Province and northeastern of Shanxi Province. The administrative division of Nihewan Basin belongs to Yangyuan County Zhangjiakou Hebei Province and Datong County - Tianzhen County Datong City Shanxi Province. The extent of the basin is west to Dongjingji rural area Yangyuan County, east to the Sanggan …	Final Disappearing Process of Ancient Lake during Quaternary in Nihewan Basin <U+FFFD><U+FFFD> 2017, Science Press. All right reserved. Nihewan Basin located in the northwestern of Hebei Province and northeastern of Shanxi Province. The administrative division of Nihewan Basin belongs to Yangyuan County Zhangjiakou Hebei Province and Datong County - Tianzhen County Datong City Shanxi Province. Th…	(5) For the first time found the late Middle Pleistocene chemical sediment in Nihewan Basin.	2-s2.0-85042597559	no		not about detections in aquatic environment
1006	20074	Frase, T., Richter, S.	Nervous system development in the fairy shrimp Branchinella sp. (Crustacea: Branchiopoda: Anostraca): Insights into the development and evolution of the branchiopod brain and its sensory organs	2016	Journal of Morphology	277	11	NA	1423	1446	NA	2	10.1002/jmor.20585	https://www.scopus.com/inward/record.url?eid=2-s2.0-84980370616&partnerID=40&md5=a3cbe7e2affe58ba4433a8ca823efe2d	Article	NA	Scopus	Â© 2016 Wiley Periodicals, Inc. Using immunohistochemical labeling against acetylated a-tubulin and serotonin in combination with confocal laser scanning microscopy and 3D-reconstruction, we investigated the temporary freshwater pond inhabitant Branchinella sp. (Crustacea: Branchiopoda: Anostraca) for the first time to provide detailed data on the development of the anostracan nervous system. Pro…	Nervous system development in the fairy shrimp Branchinella sp. (Crustacea: Branchiopoda: Anostraca): Insights into the development and evolution of the branchiopod brain and its sensory organs <U+FFFD><U+FFFD> 2016 Wiley Periodicals, Inc. Using immunohistochemical labeling against acetylated a-tubulin and serotonin in combination with confocal laser scanning microscopy and 3D-reconstruction, we …	(Crustacea: Branchiopoda: Anostraca) for the first time to provide detailed data on the development of the anostracan nervous system.	2-s2.0-84980370616	no		not about detections in aquatic environment
253	5111	Flude, S., Storey, M.	<sup>40</sup>Ar/<sup>39</sup>Ar age of the Rotoiti Breccia and Rotoehu Ash, Okataina Volcanic Complex, New Zealand, and identification of heterogeneously distributed excess<sup>40</sup>Ar in supercooled crystals	2016	Quaternary Geochronology	33	NA	NA	13	23	NA	7	10.1016/j.quageo.2016.01.002	https://www.scopus.com/inward/record.url?eid=2-s2.0-84955288964&partnerID=40&md5=68d917dac5317ab7937d51167a6b98fc	Article	NA	Scopus	Â© 2016 Elsevier B.V. Co-magmatic granitoid clasts erupted as part of the Rotoiti Ignimbrite (Rotoehu Tephra) contain euhedral K-feldspar and biotite crystals that protrude into miarolytic cavities and show textural evidence for growth in super-cooled conditions and are thus interpreted as growing during eruption. 40Ar/39Ar stepped heating experiments on single K-feldspar crystals reveal the pres…	<sup>40</sup>Ar/<sup>39</sup>Ar age of the Rotoiti Breccia and Rotoehu Ash, Okataina Volcanic Complex, New Zealand, and identification of heterogeneously distributed excess<sup>40</sup>Ar in supercooled crystals <U+FFFD><U+FFFD> 2016 Elsevier B.V. Co-magmatic granitoid clasts erupted as part of the Rotoiti Ignimbrite (Rotoehu Tephra) contain euhedral K-feldspar and biotite crystals that protrude …	<sup>40</sup>Ar/<sup>39</sup>Ar age of the Rotoiti Breccia and Rotoehu Ash, Okataina Volcanic Complex, New Zealand, and identification of heterogeneously distributed excess<sup>40</sup>Ar in supercooled crystals <U+FFFD><U+FFFD> 2016 Elsevier B.V.	2-s2.0-84955288964	no		not about detections in aquatic environment
903	20011	Shiratori, T., Ishida, K.-I.	A New Heterotrophic Cryptomonad: Hemiarma marina n. g., n. sp.	2016	Journal of Eukaryotic Microbiology	63	6	NA	804	812	NA	2	10.1111/jeu.12327	https://www.scopus.com/inward/record.url?eid=2-s2.0-84978114157&partnerID=40&md5=893f7ed0d8ae959a5122c2c24f897d32	Article	NA	Scopus	Â© 2016 The Author(s) Journal of Eukaryotic Microbiology Â© 2016 International Society of Protistologists We report a new heterotrophic cryptomonad Hemiarma marina n. g., n. sp. that was collected from a seaweed sample from the Republic of Palau. In our molecular phylogenetic analyses using the small subunit ribosomal RNA gene, H. marina formed a clade with two marine environmental sequences, and…	A New Heterotrophic Cryptomonad: Hemiarma marina n. g., n. sp. <U+FFFD><U+FFFD> 2016 The Author(s) Journal of Eukaryotic Microbiology <U+FFFD><U+FFFD> 2016 International Society of Protistologists We report a new heterotrophic cryptomonad Hemiarma marina n. g., n. sp. that was collected from a seaweed sample from the Republic of Palau. In our molecular phylogenetic analyses using the small subuni…	<U+FFFD><U+FFFD> 2016 The Author(s) Journal of Eukaryotic Microbiology <U+FFFD><U+FFFD> 2016 International Society of Protistologists We report a new heterotrophic cryptomonad Hemiarma marina n. g., n. sp. that was collected from a seaweed sample from the Republic of Palau.	2-s2.0-84978114157	No		detected in plants
1026	21629	Scheurer, M., Brauch, H.-J., Schmidt, C.K., Sacher, F.	Occurrence and fate of nitrification and urease inhibitors in the aquatic environment	2016	Environmental Science: Processes and Impacts	18	8	NA	999	1010	NA	5	10.1039/c6em00014b	https://www.scopus.com/inward/record.url?eid=2-s2.0-84982142867&partnerID=40&md5=b4be2e2fe4fae04c0a6b6dcc6bd5d926	Article	NA	Scopus	Â© The Royal Society of Chemistry. Nitrification and urease inhibitors (NUIs) decelerate the bacterial oxidation of nitrogen species by suppressing the activity of soil microorganisms. Thus, nitrogen losses can be limited and the efficiency of nitrogen fertilizers can be increased. After application NUI transfers to surface water may occur through leaching or surface run-off. In order to assess t…	Occurrence and fate of nitrification and urease inhibitors in the aquatic environment <U+FFFD><U+FFFD> The Royal Society of Chemistry. Nitrification and urease inhibitors (NUIs) decelerate the bacterial oxidation of nitrogen species by suppressing the activity of soil microorganisms. Thus, nitrogen losses can be limited and the efficiency of nitrogen fertilizers can be increased. After applicatio…	1H-1,2,4-Triazole and dicyandiamide (DCD) were detected for the first time in German surface waters.	2-s2.0-84982142867	yes	CH	1H-1,2,4-Triazole and dicyandiamide (DCD) were detected for the first time in German surface waters.
1458	18945	Billant, J., Bellier, O., Godard, V., Hippolyte, J.-C.	Constraining recent fault offsets with statistical and geometrical methods: Example from the Jasneuf Fault (Western Alps, France)	2016	Tectonophysics	693	NA	NA	1	21	NA	2	10.1016/j.tecto.2016.09.031	https://www.scopus.com/inward/record.url?eid=2-s2.0-85002559358&partnerID=40&md5=fbd6cfb87866ff678c1741082f51bc9b	Article	NA	Scopus	Ã¯Â¿Â½ 2016 Elsevier B.V. We propose two new approaches regarding recent fault offset measurements by studying the seismogenic potential of the Jasneuf Fault. The NE trending right-lateral strike-slip Jasneuf Fault is the southwestern extension of the Belledonne fault system in the Vercors Massif. This fault, which is located in an intraplate domain, does not show strongly associated seismicity b…	Constraining recent fault offsets with statistical and geometrical methods: Example from the Jasneuf Fault (Western Alps, France) <U+FFFD><U+FFFD><U+FFFD><U+FFFD><U+FFFD><U+FFFD> 2016 Elsevier B.V. We propose two new approaches regarding recent fault offset measurements by studying the seismogenic potential of the Jasneuf Fault. The NE trending right-lateral strike-slip Jasneuf Fault is the south…	2 - We propose a new method that enables us to determine the fault offset and kinematics by using recursive measurements of topographic apparent offsets to counter the lack of morphologic features that are used to determine piercing points or lines.	2-s2.0-85002559358	no		new identification method
3701	10968	Zhang, D., Chu, W., Yu, Y., Krasner, S.W., Pan, Y., Shi, J., Yin, D., Gao, N.	Occurrence and Stability of Chlorophenylacetonitriles: A New Class of Nitrogenous Aromatic DBPs in Chlorinated and Chloraminated Drinking Waters	2018	Environmental Science and Technology Letters	5	6	NA	394	399	NA	NA	10.1021/acs.estlett.8b00220	https://www.scopus.com/inward/record.url?eid=2-s2.0-85047622560&partnerID=40&md5=427153f3cd0f72b3e0c903812b4d4674	Article	NA	Scopus	Â© 2018 American Chemical Society. 2-Chlorophenylacetonitrile (2-CPAN) and 3,4-dichlorophenylacetonitrile (3,4-DCPAN), representatives of a new class of nitrogenous aromatic disinfection byproducts, were first identified and quantified in chlorinated and chloraminated drinking waters. The impacts of pH, disinfectant residuals, and quenching agents on the stability of two chlorophenylacetonitriles…	Occurrence and Stability of Chlorophenylacetonitriles: A New Class of Nitrogenous Aromatic DBPs in Chlorinated and Chloraminated Drinking Waters <U+FFFD><U+FFFD> 2018 American Chemical Society. 2-Chlorophenylacetonitrile (2-CPAN) and 3,4-dichlorophenylacetonitrile (3,4-DCPAN), representatives of a new class of nitrogenous aromatic disinfection byproducts, were first identified and quantified in c…	2-Chlorophenylacetonitrile (2-CPAN) and 3,4-dichlorophenylacetonitrile (3,4-DCPAN), representatives of a new class of nitrogenous aromatic disinfection byproducts, were first identified and quantified in chlorinated and chloraminated drinking waters.	2-s2.0-85047622560	yes	CH	2-Chlorophenylacetonitrile (2-CPAN) and 3,4-dichlorophenylacetonitrile (3,4-DCPAN) in chlorinated and chloraminated drinking waters.
3453	12680	Stange, M., Aguirre-FernÃ¡ndez, G., Salzburger, W., SÃ¡nchez-Villagra, M.R.	Study of morphological variation of northern Neotropical Ariidae reveals conservatism despite macrohabitat transitions	2018	BMC Evolutionary Biology	18	1	38	NA	NA	NA	NA	10.1186/s12862-018-1152-y	https://www.scopus.com/inward/record.url?eid=2-s2.0-85044515324&partnerID=40&md5=a5895504755e5658f397645396b34a5c	Article	NA	Scopus	Â© 2018 The Author(s).Background: Morphological convergence triggered by trophic adaptations is a common pattern in adaptive radiations. The study of shape variation in an evolutionary context is usually restricted to well-studied fish models. We take advantage of the recently revised systematics of New World Ariidae and investigate skull shape evolution in six genera of northern Neotropical Arii…	Study of morphological variation of northern Neotropical Ariidae reveals conservatism despite macrohabitat transitions <U+FFFD><U+FFFD> 2018 The Author(s).Background: Morphological convergence triggered by trophic adaptations is a common pattern in adaptive radiations. The study of shape variation in an evolutionary context is usually restricted to well-studied fish models. We take advantage of t…	3D geometric morphometrics was applied for the first time in catfish skulls and phylogenetically informed statistical analyses were performed to test for the impact of habitat on skull diversification after habitat transition in this lineage.	2-s2.0-85044515324	no		new identification method
3633	1079	Sun, M., Lin, H., Wang, M., Liu, Y., Liu, Z., Meng, X., Jiang, Y., Wang, D., Li, Y., Xia, J.	Characterization and complete genome of the marine Pseudoalteromonas phage PH103, isolated from the Yellow Sea, China	2018	Marine Genomics	NA	NA	NA	NA	NA	NA	NA	10.1016/j.margen.2018.04.003	https://www.scopus.com/inward/record.url?eid=2-s2.0-85046810004&partnerID=40&md5=3c9ae541fce51f8afb3d6340266b0007	Article in Press	NA	Scopus	Â© 2018 Elsevier B.V. A new marine phage-host system was isolated and further purified from the surface water of the Yellow Sea, China, using the agar overlay method. The host bacterium was identified to be a strain of Pseudoalteromonas marina by its 16S rRNA gene sequence. The phage, named Pseudoalteromonas phage PH103, was characterized and identified by morphological examination, host infectio…	Characterization and complete genome of the marine Pseudoalteromonas phage PH103, isolated from the Yellow Sea, China <U+FFFD><U+FFFD> 2018 Elsevier B.V. A new marine phage-host system was isolated and further purified from the surface water of the Yellow Sea, China, using the agar overlay method. The host bacterium was identified to be a strain of Pseudoalteromonas marina by its 16S rRNA gene se…	44.74% of the total genome had no homologous sequence matching, which indicates that phage PH103 is newly identified.	2-s2.0-85046810004	yes	MB	new phage
392	6489	Balakrishnan, V.K., Shirin, S., Aman, A.M., de Solla, S.R., Mathieu-Denoncourt, J., Langlois, V.S.	Genotoxic and carcinogenic products arising from reductive transformations of the azo dye, Disperse Yellow 7	2016	Chemosphere	146	NA	NA	206	215	NA	15	10.1016/j.chemosphere.2015.11.119	https://www.scopus.com/inward/record.url?eid=2-s2.0-84959189504&partnerID=40&md5=f2f4503230bed9722b90858cd129ccce	Article	NA	Scopus	Â© 2015 . Selected aromatic azo and benzidine based dyes are priority compounds under the Government of Canada's Chemical Management Plan (CMP) for environmental risk assessments. Organic compounds undergo chemical and biological transformations when they interact with environmental matrices and biotic species; identifying the transformation products is thus a critical component of the risk asses…	Genotoxic and carcinogenic products arising from reductive transformations of the azo dye, Disperse Yellow 7 <U+FFFD><U+FFFD> 2015 . Selected aromatic azo and benzidine based dyes are priority compounds under the Government of Canada's Chemical Management Plan (CMP) for environmental risk assessments. Organic compounds undergo chemical and biological transformations when they interact with enviro…	4-ABP is thought to form via a benzidine rearrangement; this is the first report of DY 7 undergoing a benzidine rearrangement.	2-s2.0-84959189504	yes	CH	lab study
1080	7016	KanduÄ, T., Mori, N., Koceli, A., VerbovÅ¡ek, T.	Hydrogeochemistry and isotope geochemistry of velenje basin groundwater	2016	Geologija	59	1	NA	7	22	NA	NA	10.5474/geologija.2016.001	https://www.scopus.com/inward/record.url?eid=2-s2.0-84983489999&partnerID=40&md5=6352c9fbb5d88ac3be14a38151620044	Article	NA	Scopus	Â© Author(s) 2016. The geochemical and isotopic composition of groundwater in the Velenje Basin, Slovenia, was investigated between the years 2014 to 2015 to identify the geochemical processes in the major aquifers (Pliocene and Triassic) and the water-rock interactions. Thirty-eight samples of groundwater were taken from the aquifers, 19 in the mine and 19 from the surface. Groundwater in the Tr…	Hydrogeochemistry and isotope geochemistry of velenje basin groundwater <U+FFFD><U+FFFD> Author(s) 2016. The geochemical and isotopic composition of groundwater in the Velenje Basin, Slovenia, was investigated between the years 2014 to 2015 to identify the geochemical processes in the major aquifers (Pliocene and Triassic) and the water-rock interactions. Thirty-eight samples of groundwater were …	87Sr/86Sr tracer was used for the first time in Slovenia to determine geochemical processes (dissolution of silicate versus carbonate fraction) in Velenje Basin groundwater of different aquifers dewatering Pliocene and Triassic strata.	2-s2.0-84983489999	no		not about detections in aquatic environment
3371	12941	Mills, J.C., Wilson, J.T., Wilson, B.H., Wiedemeier, T.H., Freedman, D.L.	Quantification of TCE Co-Oxidation in Groundwater Using a<sup>14</sup>Câ€“Assay	2018	Groundwater Monitoring and Remediation	38	2	NA	57	67	NA	1	10.1111/gwmr.12266	https://www.scopus.com/inward/record.url?eid=2-s2.0-85042940823&partnerID=40&md5=da562db5d9b5900794416ff86669edbc	Article	NA	Scopus	Â© 2018, National Ground Water Association Bacteria that degrade natural organic matter in groundwater contain oxygenase enzymes that can co-oxidize trichloroethene (TCE). This degradation pathway is promising for large dilute plumes, but its evaluation is limited because the density of the bacteria with oxygenase enzymes has not been correlated to field scale rates of degradation. A 14Câ€“TCE as…	Quantification of TCE Co-Oxidation in Groundwater Using a<sup>14</sup>C<U+FFFD><U+FFFD><U+FFFD>Assay <U+FFFD><U+FFFD> 2018, National Ground Water Association Bacteria that degrade natural organic matter in groundwater contain oxygenase enzymes that can co-oxidize trichloroethene (TCE). This degradation pathway is promising for large dilute plumes, but its evaluation is limited because the density…	A 14C<U+FFFD><U+FFFD><U+FFFD>TCE assay was developed to determine pseudo first-order rate constants for the aerobic co-oxidation of TCE in groundwater.	2-s2.0-85042940823	no		not about detections in aquatic environment
327	6505	Kaas, L., Gourinat, A.-C., UrbÃ¨s, F., Langlet, J.	A 1-Year Study on the Detection of Human Enteric Viruses in New Caledonia	2016	Food and Environmental Virology	8	1	NA	46	56	NA	6	10.1007/s12560-015-9224-2	https://www.scopus.com/inward/record.url?eid=2-s2.0-84958047620&partnerID=40&md5=e547640de13f677eb9f009bbe9765616	Article	NA	Scopus	Â© 2015, Springer Science+Business Media New York.Human enteric viruses occur in high concentrations in wastewater and can contaminate receiving environmental waters. Due to the lack of data on the prevalence of enteric viruses in New Caledonia, the presence and the concentrations of enteric viruses in wastewater and seawater were determined. Untreated wastewater and seawater samples were collect…	A 1-Year Study on the Detection of Human Enteric Viruses in New Caledonia <U+FFFD><U+FFFD> 2015, Springer Science+Business Media New York.Human enteric viruses occur in high concentrations in wastewater and can contaminate receiving environmental waters. Due to the lack of data on the prevalence of enteric viruses in New Caledonia, the presence and the concentrations of enteric viruses in wastewa…	A 1-Year Study on the Detection of Human Enteric Viruses in New Caledonia <U+FFFD><U+FFFD> 2015, Springer Science+Business Media New York.	2-s2.0-84958047620	no		not about detections in aquatic environment
2070	6140	Sanahuja, G., Lopez, P., Palmateer, A.J.	First report of Phytophthora nicotianae causing foliar blight on zamioculcas Zamiifolia in Florida	2016	Plant Disease	100	4	NA	864	NA	NA	NA	10.1094/PDIS-09-15-1034-PDN	https://www.scopus.com/inward/record.url?eid=2-s2.0-85018584592&partnerID=40&md5=936766594c3cb678e408a7f86303c8cc	Article	NA	Scopus	Â© 2016, American Phytopathological Society. All rights reserved. Zamioculcas zamiifolia, commonly known as the â€˜ZZâ€™ plant, is a member of the Araceae, indigenous to South Africa. Zamioculcas zamiifolia is different from most other foliage plants, being a stemless, herbaceous, forest plant that develops short sprouts from a thick underground tuberlike rhizome that stores water. Due to this rh…	First report of Phytophthora nicotianae causing foliar blight on zamioculcas Zamiifolia in Florida <U+FFFD><U+FFFD> 2016, American Phytopathological Society. All rights reserved. Zamioculcas zamiifolia, commonly known as the <U+FFFD><U+FFFD><U+FFFD>ZZ<U+FFFD><U+FFFD><U+FFFD> plant, is a member of the Araceae, indigenous to South Africa. Zamioculcas zamiifolia is different from most other foliage …	A basal petiole rot of Z. zamiifolia has been reported in Taiwan (Feng et al. 2006), but this is the first report of P. nicotianae causing foliar blight in Florida.	2-s2.0-85018584592	no		detected in plants
1281	20423	Shams, D.F., Rubio, A., Elefsiniotis, P., Singhal, N.	Post-denitrification using alginate beads containing organic carbon and activated sludge microorganisms	2016	Water Science and Technology	74	7	NA	1626	1635	NA	NA	10.2166/wst.2016.328	https://www.scopus.com/inward/record.url?eid=2-s2.0-84992052398&partnerID=40&md5=5119b4aff2be1c8c7b5f82a9539eec03	Article	NA	Scopus	Â© IWA Publishing 2016. Nitrate concentration in the final effluent is a key issue in pre-denitrification biological treatment systems. This study investigated post-denitrification with alginate beads containing immobilized activated sludge microorganisms and organic carbon source. A batch study was first performed to identify suitable carbon sources among acetate, glucose, calcium tartrate, star…	Post-denitrification using alginate beads containing organic carbon and activated sludge microorganisms <U+FFFD><U+FFFD> IWA Publishing 2016. Nitrate concentration in the final effluent is a key issue in pre-denitrification biological treatment systems. This study investigated post-denitrification with alginate beads containing immobilized activated sludge microorganisms and organic carbon source…	A batch study was first performed to identify suitable carbon sources among acetate, glucose, calcium tartrate, starch and canola oil on the basis of nitrate removal and bead stability.	2-s2.0-84992052398	no		not about detections in aquatic environment
2942	2342	Teatini, P., Isotton, G., Nardean, S., Ferronato, M., Mazzia, A., Da Lio, C., Zaggia, L., Bellafiore, D., Zecchin, M., Baradello, L., Cellone, F., Corami, F., Gambaro, A., Libralato, G., Morabito, E., Volpi Ghirardini, A., Broglia, R., Zaghi, S., Tosi, L.	Hydrogeological effects of dredging navigable canals through lagoon shallows. A case study in Venice	2017	Hydrology and Earth System Sciences	21	11	NA	5627	5646	NA	1	10.5194/hess-21-5627-2017	https://www.scopus.com/inward/record.url?eid=2-s2.0-85034036791&partnerID=40&md5=7d97af6cfa5a025a7c7c0db0c82483d3	Article	Open Access	Scopus	For the first time a comprehensive investigation has been carried out to quantify the possible effects of dredging a navigable canal on the hydrogeological system underlying a coastal lagoon. The study is focused on the Venice Lagoon, Italy, where the port authority is planning to open a new 10m deep and 3km long canal to connect the city passenger terminal to the central lagoon inlet, thus avoid…	Hydrogeological effects of dredging navigable canals through lagoon shallows. A case study in Venice For the first time a comprehensive investigation has been carried out to quantify the possible effects of dredging a navigable canal on the hydrogeological system underlying a coastal lagoon. The study is focused on the Venice Lagoon, Italy, where the port authority is planning to open a new 10m d…	A case study in Venice For the first time a comprehensive investigation has been carried out to quantify the possible effects of dredging a navigable canal on the hydrogeological system underlying a coastal lagoon.	2-s2.0-85034036791	no		not about detections in aquatic environment
3390	11639	Zhan, L.-T., Zhang, Z., Chen, Y.-M., Chen, R., Zhang, S., Liu, J., Li, A.-G.	The 2015 Shenzhen catastrophic landslide in a construction waste dump: Reconstitution of dump structure and failure mechanisms via geotechnical investigations	2018	Engineering Geology	238	NA	NA	15	26	NA	NA	10.1016/j.enggeo.2018.02.019	https://www.scopus.com/inward/record.url?eid=2-s2.0-85043479065&partnerID=40&md5=f82dd24bd69fac3ef751d7d0ee6ee5c5	Article	NA	Scopus	Â© 2018 Elsevier B.V. A catastrophic displacement of a waste dump occurred on December 20, 2015, in Guangming New District, Shenzhen, China. During this event, approximately 2.51 Ã— 106 m3 of construction waste slid out of the dump site affecting approximately 0.38 km2, destroying 33 buildings and killing 77 people. This study tries to reconstruct the dump structure prior to the failure event, in…	The 2015 Shenzhen catastrophic landslide in a construction waste dump: Reconstitution of dump structure and failure mechanisms via geotechnical investigations <U+FFFD><U+FFFD> 2018 Elsevier B.V. A catastrophic displacement of a waste dump occurred on December 20, 2015, in Guangming New District, Shenzhen, China. During this event, approximately 2.51 <U+FFFD><U+FFFD> 106 m3 of construction waste s…	A catastrophic displacement of a waste dump occurred on December 20, 2015, in Guangming New District, Shenzhen, China.	2-s2.0-85043479065	no		not about detections in aquatic environment
1527	15986	Ferraris, M., Perero, S., Ferraris, S., Miola, M., VernÃ¨, E., Skoglund, S., Blomberg, E., Odnevall Wallinder, I.	Antibacterial silver nanocluster/silica composite coatings on stainless steel	2017	Applied Surface Science	396	NA	NA	1546	1555	NA	4	10.1016/j.apsusc.2016.11.207	https://www.scopus.com/inward/record.url?eid=2-s2.0-85006940232&partnerID=40&md5=8b4fec78b5e66d6057bd9ac840f3fb2f	Article	NA	Scopus	Â© 2016 Elsevier B.V. A coating made of silver nanocluster/silica composites has been deposited, via a radio frequency (RF) co-sputtering technique, for the first time onto stainless steel (AISI 304L) with the aim to improve its antibacterial properties. Different thermal treatments after coating deposition have been applied in order to optimize the coating adhesion, cohesion and its antibacteria…	Antibacterial silver nanocluster/silica composite coatings on stainless steel <U+FFFD><U+FFFD> 2016 Elsevier B.V. A coating made of silver nanocluster/silica composites has been deposited, via a radio frequency (RF) co-sputtering technique, for the first time onto stainless steel (AISI 304L) with the aim to improve its antibacterial properties. Different thermal treatments after coating depositio…	A coating made of silver nanocluster/silica composites has been deposited, via a radio frequency (RF) co-sputtering technique, for the first time onto stainless steel (AISI 304L) with the aim to improve its antibacterial properties.	2-s2.0-85006940232	no		not about detections in aquatic environment
1699	20046	Dzyuba, E.V., Belâ€™kova, N.L., Denikina, N.N.	A study of the intestinal microbiomes of the Lake Baikal oilfishes (Cottoidei, Comephoridae)	2016	Biology Bulletin	43	6	NA	573	577	NA	NA	10.1134/S106235901606008X	https://www.scopus.com/inward/record.url?eid=2-s2.0-85011960885&partnerID=40&md5=8320d6e658f255fb1764581dc4ce3e2a	Article	NA	Scopus	Â© 2016, Pleiades Publishing, Inc. A comparative analysis of the intestinal microbiomes of some representatives of the Lake Baikal endemic family Comephoridaeâ€”the big oilfish Comephorus baicalensis (Pallas, 1776) and the little oilfish C. dybowski (Korotneff, 1904)â€”has been performed for the first time. The phylotype Akkermansia (phylum Verrucomicrobia) was detected in the C. dybowski microbi…	A study of the intestinal microbiomes of the Lake Baikal oilfishes (Cottoidei, Comephoridae) <U+FFFD><U+FFFD> 2016, Pleiades Publishing, Inc. A comparative analysis of the intestinal microbiomes of some representatives of the Lake Baikal endemic family Comephoridae<U+FFFD><U+FFFD><U+FFFD>the big oilfish Comephorus baicalensis (Pallas, 1776) and the little oilfish C. dybowski (Korotneff, 1904)<U+F…	A comparative analysis of the intestinal microbiomes of some representatives of the Lake Baikal endemic family Comephoridae<U+FFFD><U+FFFD><U+FFFD>the big oilfish Comephorus baicalensis (Pallas, 1776) and the little oilfish C. dybowski (Korotneff, 1904)<U+FFFD><U+FFFD><U+FFFD>has been performed for the first time.	2-s2.0-85011960885	no		not about detections in aquatic environment
1647	6597	Neary, D.G., Baillie, B.R.	Cumulative effects analysis of thewater quality risk of herbicides used for site preparation in the Central North Island, New Zealand	2016	Water (Switzerland)	8	12	573	NA	NA	NA	2	10.3390/w8120573	https://www.scopus.com/inward/record.url?eid=2-s2.0-85010399661&partnerID=40&md5=8a7f2d7016b8ba89da6176b53a15ad6d	Article	Open Access	Scopus	Â© 2016 by the authors. Herbicide use varies both spatially and temporally within managed forests. While information exists on the effects of herbicide use on water quality at the site and small catchment scale, little is known about the cumulative effects of herbicide use at the landscape scale. A cumulative effects analysis was conducted in the upper Rangitaiki catchment (118,345 ha) in New Zea…	Cumulative effects analysis of thewater quality risk of herbicides used for site preparation in the Central North Island, New Zealand <U+FFFD><U+FFFD> 2016 by the authors. Herbicide use varies both spatially and temporally within managed forests. While information exists on the effects of herbicide use on water quality at the site and small catchment scale, little is known about the cumulative ef…	A cumulative effects analysis was conducted in the upper Rangitaiki catchment (118,345 ha) in New Zealand, to determine the risk to water quality from two herbicides commonly used for post-plant weed control: terbuthylazine and hexazinone.	2-s2.0-85010399661	no		not about detections in aquatic environment
1202	21418	Inman-Bamber, N.G., Jackson, P.A., Stokes, C.J., Verrall, S., Lakshmanan, P., Basnayake, J.	Sugarcane for water-limited environments: Enhanced capability of the APSIM sugarcane model for assessing traits for transpiration efficiency and root water supply	2016	Field Crops Research	196	NA	NA	112	123	NA	3	10.1016/j.fcr.2016.06.013	https://www.scopus.com/inward/record.url?eid=2-s2.0-84989826262&partnerID=40&md5=3b7788a609f051e4451c2683e8ef9bee	Article	NA	Scopus	Â© 2016 Elsevier B.V. Genetic variation in traits affecting transpiration efficiency has been reported in sugarcane, but the impact of this variation on yield in a range of production environments needs to be estimated for assessing the priority and selection weightings to apply to these traits in crop improvement programs. A modelling approach may be useful and even necessary for reasonable asse…	Sugarcane for water-limited environments: Enhanced capability of the APSIM sugarcane model for assessing traits for transpiration efficiency and root water supply <U+FFFD><U+FFFD> 2016 Elsevier B.V. Genetic variation in traits affecting transpiration efficiency has been reported in sugarcane, but the impact of this variation on yield in a range of production environments needs to be estimated for…	A dataset of 182 observations of above ground biomass from 13 field experiments of sugarcane were used to check firstly that the new sugarcane module did not affect the simulation results when all the new features were disabled (model stability), secondly to check that the new features did not greatly reduce model performance, and thirdly, to determine the response or sensitivity of yields to the…	2-s2.0-84989826262	no		not about detections in aquatic environment
3081	1813	Sopilniak, A., Elkayam, R., Lev, O.	Nitrification in a soil-aquifer treatment system: Comparison of potential nitrification and concentration profiles in the vadose zone	2017	Environmental Science: Processes and Impacts	19	12	NA	1571	1582	NA	NA	10.1039/c7em00402h	https://www.scopus.com/inward/record.url?eid=2-s2.0-85038369270&partnerID=40&md5=5876da167dd73e5714ec4843ed729f69	Article	NA	Scopus	Â© 2017 The Royal Society of Chemistry. The oxidation of ammonium in the vadose zone of soil aquifer systems is discussed and examined by detailed analysis of the depth profiles of dissolved oxygen, nitrate and ammonium concentrations in the vadose zone of a soil-aquifer treatment (SAT) system of a municipal wastewater treatment system of the Tel Aviv metropolitan area. Nitrification kinetics and…	Nitrification in a soil-aquifer treatment system: Comparison of potential nitrification and concentration profiles in the vadose zone <U+FFFD><U+FFFD> 2017 The Royal Society of Chemistry. The oxidation of ammonium in the vadose zone of soil aquifer systems is discussed and examined by detailed analysis of the depth profiles of dissolved oxygen, nitrate and ammonium concentrations in the vadose zo…	A depth profile of the Potential Nitrification (P.N), a measure of the local amount and activity of nitrifiers, is presented for the first time in the vadose zone of a SAT system showing that there are sufficient nitrifiers to oxidize all the ammonia that is supplied in a flooding cycle within less than 2 h, under optimal microbiological conditions based on the existing nitrifiers and their spati…	2-s2.0-85038369270	no		not about detections in aquatic environment
283	8217	Bulat, S.A.	Microbiology of the subglacial Lake Vostok: First results of borehole-frozen lake water analysis and prospects for searching for lake inhabitants	2016	Philosophical Transactions of the Royal Society A: Mathematical, Physical and Engineering Sciences	374	2059	20140292	NA	NA	NA	9	10.1098/rsta.2014.0292	https://www.scopus.com/inward/record.url?eid=2-s2.0-84956653436&partnerID=40&md5=92b7f593cd2cc35c7776b36c90b12913	Article	NA	Scopus	Â© 2015 The Author(s) Published by the Royal Society. All rights reserved.This article examines the question of the possible existence of microbial life inhabiting the subglacial Lake Vostok buried beneath a 4 km thick Antarctic ice sheet. It represents the results of analysis of the only available frozen lake water samples obtained upon the first lake entry and subsequent re-coring the water fro…	Microbiology of the subglacial Lake Vostok: First results of borehole-frozen lake water analysis and prospects for searching for lake inhabitants <U+FFFD><U+FFFD> 2015 The Author(s) Published by the Royal Society. All rights reserved.This article examines the question of the possible existence of microbial life inhabiting the subglacial Lake Vostok buried beneath a 4 km thick Antarctic ice sheet.…	A description of two Lake Vostok penetrations is presented for the first time from the point of view of possible clean water sampling.	2-s2.0-84956653436	no		not about detections in aquatic environment
3421	13239	Agafonov, M.I., Karitskaya, E.A., Sharova, O.I., Bochkarev, N.G., Zharikov, S.V., Butenko, G.Z., Bondarâ€™, A.V., Bubukin, I.T.	Analysis of 3D Doppler Tomography of the X-ray Binary System Cygnus X-1 from Spectral Observations in 2007 in the HeII Î» 4686 Ã… Line	2018	Astronomy Reports	62	3	NA	225	237	NA	NA	10.1134/S1063772918030010	https://www.scopus.com/inward/record.url?eid=2-s2.0-85044163594&partnerID=40&md5=e03fd0953ba903108cbce8ec7123f5ab	Article	NA	Scopus	Â© 2018, Pleiades Publishing, Ltd.This is the second paper in a series dedicated to studies of the X-ray binary Cyg X-1 in the HeII Î» 4686 Ã… line using 3D Doppler tomography. A detailed analysis of the tomogram constructed has made it possible for the first time to obtain information about the motions of gaseous flows including all three velocity components. The observations were obtained in Ju…	Analysis of 3D Doppler Tomography of the X-ray Binary System Cygnus X-1 from Spectral Observations in 2007 in the HeII <U+FFFD><U+FFFD> 4686 <U+FFFD><U+FFFD> Line <U+FFFD><U+FFFD> 2018, Pleiades Publishing, Ltd.This is the second paper in a series dedicated to studies of the X-ray binary Cyg X-1 in the HeII <U+FFFD><U+FFFD> 4686 <U+FFFD><U+FFFD> line using 3D Doppler tomography. A detailed analys…	A detailed analysis of the tomogram constructed has made it possible for the first time to obtain information about the motions of gaseous flows including all three velocity components.	2-s2.0-85044163594	no		not about detections in aquatic environment
62	6615	Pan, Y., Zhang, X., Li, Y.	Identification, toxicity and control of iodinated disinfection byproducts in cooking with simulated chlor(am)inated tap water and iodized table salt	2016	Water Research	88	NA	NA	60	68	NA	37	10.1016/j.watres.2015.10.002	https://www.scopus.com/inward/record.url?eid=2-s2.0-84944463233&partnerID=40&md5=6d664a9128c17aae0a03ecaaf24c6a99	Article	NA	Scopus	Â© 2015 Elsevier Ltd.Chlorine/chloramine residuals are maintained in drinking water distribution systems to prevent microbial contamination and microorganism regrowth. During household cooking processes (e.g., soup making), the residual chlorine/chloramines in tap water may react with the iodide in iodized table salt to form hypoiodous acid, which could react with remaining natural organic matter…	Identification, toxicity and control of iodinated disinfection byproducts in cooking with simulated chlor(am)inated tap water and iodized table salt <U+FFFD><U+FFFD> 2015 Elsevier Ltd.Chlorine/chloramine residuals are maintained in drinking water distribution systems to prevent microbial contamination and microorganism regrowth. During household cooking processes (e.g., soup making), the residual…	A developmental toxicity with a recently developed sensitive bioassay was conducted for the newly identified I-DBPs, suggesting that phenolic I-DBPs (except for iodinated carboxyphenols) were about 50-200 times more developmentally toxic than aliphatic I-DBPs.	2-s2.0-84944463233	no		new toxicity results
63	22495	Obolewski, K., GliÅ„ska-Lewczuk, K., OÅ¼go, M., Astel, A.	Connectivity restoration of floodplain lakes: an assessment based on macroinvertebrate communities	2016	Hydrobiologia	774	1	NA	23	37	NA	7	10.1007/s10750-015-2530-8	https://www.scopus.com/inward/record.url?eid=2-s2.0-84944704814&partnerID=40&md5=93f9030e26f72fb50316dacc5d111acd	Article	Open Access	Scopus	Â© 2015, The Author(s). Successful rehabilitation programmes of riverâ€“floodplain systems require understanding of environmental impacts of restoring hydrological connectivity. The present study is based on a field experiment carried out between 2008 and 2013 in a floodplain of a lowland river in northern Poland, in which two oxbow lakes isolated in the 1920s were reconnected to the main river c…	Connectivity restoration of floodplain lakes: an assessment based on macroinvertebrate communities <U+FFFD><U+FFFD> 2015, The Author(s). Successful rehabilitation programmes of river<U+FFFD><U+FFFD><U+FFFD>floodplain systems require understanding of environmental impacts of restoring hydrological connectivity. The present study is based on a field experiment carried out between 2008 and 2013 in a…	A direct inflow of water into the reconnected oxbow lakes occurred only during the first 2 years of the study, followed by silting and overgrowing of the inlet to the upper arm.	2-s2.0-84944704814	no		not about detections in aquatic environment
3733	11765	Jennings, M., Abdulla, H., Stubbins, A., Sun, L., Wang, R., Mopper, K.	A dissolved organic carbon (DOC) analyzer capable of detecting sub-Î¼M DOC differences in natural fresh waters: A proof of concept study	2018	Limnology and Oceanography: Methods	16	5	NA	309	321	NA	NA	10.1002/lom3.10249	https://www.scopus.com/inward/record.url?eid=2-s2.0-85048036486&partnerID=40&md5=7ae5071a38230486b7119e3d78e27cd4	Article	NA	Scopus	Â© 2018 Association for the Sciences of Limnology and Oceanography This study reports the development of a new type of organic carbon (OC) analyzer that combines flow through analysis and ultraviolet-wet chemical oxidation (UV-WCO). Total or dissolved OC (TOC or DOC, respectively) is determined through detection of CO2 as the oxidation product using a vibration insensitive nondispersive infrared …	A dissolved organic carbon (DOC) analyzer capable of detecting sub-<U+FFFD><U+FFFD>M DOC differences in natural fresh waters: A proof of concept study <U+FFFD><U+FFFD> 2018 Association for the Sciences of Limnology and Oceanography This study reports the development of a new type of organic carbon (OC) analyzer that combines flow through analysis and ultraviolet-wet chemical oxidation (UV-WCO). T…	A dissolved organic carbon (DOC) analyzer capable of detecting sub-<U+FFFD><U+FFFD>M DOC differences in natural fresh waters: A proof of concept study <U+FFFD><U+FFFD> 2018 Association for the Sciences of Limnology and Oceanography This study reports the development of a new type of organic carbon (OC) analyzer that combines flow through analysis and ultraviolet-wet chemical oxidation (UV-WCO).	2-s2.0-85048036486	no		not about detections in aquatic environment
2349	15942	Romanenko, L.G.	A dynamical study of the multiple system 17 Cygni ABFG	2017	Astronomy Reports	61	3	NA	206	220	NA	NA	10.1134/S1063772917020056	https://www.scopus.com/inward/record.url?eid=2-s2.0-85021695627&partnerID=40&md5=5d1a0308f2d4ec463cd801609a18c2dc	Article	NA	Scopus	Â© 2017, Pleiades Publishing, Ltd.Adynamical study of the relative motions of the components of the inner pairs AB (ADS 12913) and FG (ADS 12889) of the quadruple heirarchical system 17 Cygni (WDS 19464+3344) is presented, as well as analysis of themotions of the outer pair ABâ€“FG. The study is based on CCD observations obtained on the 26-inch refractor of the Pulkovo Observatory (2003â€“2013), …	A dynamical study of the multiple system 17 Cygni ABFG <U+FFFD><U+FFFD> 2017, Pleiades Publishing, Ltd.Adynamical study of the relative motions of the components of the inner pairs AB (ADS 12913) and FG (ADS 12889) of the quadruple heirarchical system 17 Cygni (WDS 19464+3344) is presented, as well as analysis of themotions of the outer pair AB<U+FFFD><U+FFFD><U+FFFD>FG. The study is based on CCD…	A family of orbits for 17 Cyg AB is obtained for the first time, and has a most probable period of 6200 yrs.	2-s2.0-85021695627	no		not about detections in aquatic environment
3847	1462	VaÅˆkÃ¡tovÃ¡, P., KalÃ­kovÃ¡, K., KubÃ­ÄkovÃ¡, A.	Ultra-performance supercritical fluid chromatography: A powerful tool for the enantioseparation of thermotropic fluorinated liquid crystals	2018	Analytica Chimica Acta	NA	NA	NA	NA	NA	NA	NA	10.1016/j.aca.2018.07.001	https://www.scopus.com/inward/record.url?eid=2-s2.0-85049438308&partnerID=40&md5=cc81ad2876047564b598c6082ee36dd0	Article in Press	NA	Scopus	Â© 2018 Elsevier B.V. A fast and simple supercritical fluid chromatography method for the enantioseparation of twenty newly synthesized orthoconic antiferroelectric liquid crystals is reported for the first time. The effects of alkoxy spacer length and fluorine atom presence and position in the phenyl ring on chromatographic behavior were investigated. Baseline enantioseparation of all compounds …	Ultra-performance supercritical fluid chromatography: A powerful tool for the enantioseparation of thermotropic fluorinated liquid crystals <U+FFFD><U+FFFD> 2018 Elsevier B.V. A fast and simple supercritical fluid chromatography method for the enantioseparation of twenty newly synthesized orthoconic antiferroelectric liquid crystals is reported for the first time. The effects of alkoxy spacer len…	A fast and simple supercritical fluid chromatography method for the enantioseparation of twenty newly synthesized orthoconic antiferroelectric liquid crystals is reported for the first time.	2-s2.0-85049438308	no		new identification method
560	7079	Maraki, S., Christidou, A., Anastasaki, M., Scoulica, E.	Non-O1, non-O139 Vibrio cholerae bacteremic skin and soft tissue infections	2016	Infectious Diseases	48	3	NA	171	176	NA	5	10.3109/23744235.2015.1104720	https://www.scopus.com/inward/record.url?eid=2-s2.0-84962225416&partnerID=40&md5=bf0092fafd0fe776db1a98ec72e711e3	Review	NA	Scopus	Â© 2015 Society for Scandinavian Journal of Infectious Diseases. Background Non-O1, non-O139 Vibrio cholerae can cause sporadic cases of gastroenteritis and extra-intestinal invasive infections, following exposure to contaminated seawater or freshwater or after consumption of raw seafood. Bacteremic infections with skin and soft tissue manifestations are uncommon and in most cases are associated …	Non-O1, non-O139 Vibrio cholerae bacteremic skin and soft tissue infections <U+FFFD><U+FFFD> 2015 Society for Scandinavian Journal of Infectious Diseases. Background Non-O1, non-O139 Vibrio cholerae can cause sporadic cases of gastroenteritis and extra-intestinal invasive infections, following exposure to contaminated seawater or freshwater or after consumption of raw seafood. Bacteremic infectio…	A fatal case of bacteremia with bullous cellulitis in a 43-year-old patient with liver cirrhosis is described, which is the first reported in Greece.	2-s2.0-84962225416	no		first fatal case of bateremia with bullous cellulitis
412	7355	Malkiewicz, M., Waroszewski, J., Bojko, O., Egli, M., Kabala, C.	Holocene vegetation history and soil development reflected in the lake sediments of the Karkonosze Mountains (Poland)	2016	Holocene	26	6	NA	890	905	NA	12	10.1177/0959683615622546	https://www.scopus.com/inward/record.url?eid=2-s2.0-84959375437&partnerID=40&md5=568bd1bc2b9b73c8844c7c795c3aac8f	Article	NA	Scopus	Â© 2016, Â© The Author(s) 2016.A 11-m-long lake sediment core of a mountain lake situated at 1225 m a.s.l. in the Karkonosze Mountains (Poland) provided a unique, multi-proxy archive to reconstruct natural and human-induced environmental changes over the entire Holocene period. Pollen analyses allowed for the local and regional reconstruction of vegetation history. The chemical composition of the…	Holocene vegetation history and soil development reflected in the lake sediments of the Karkonosze Mountains (Poland) <U+FFFD><U+FFFD> 2016, <U+FFFD><U+FFFD> The Author(s) 2016.A 11-m-long lake sediment core of a mountain lake situated at 1225 m a.s.l. in the Karkonosze Mountains (Poland) provided a unique, multi-proxy archive to reconstruct natural and human-induced environmental changes over th…	A first progressive soil-forming phase occurred from 10.9 until about 8.4 ka cal.	2-s2.0-84959375437	no		not about detections in aquatic environment
418	5696	Li, Z., Chen, J., Guo, H., Fan, X., Wen, Z., Yeh, M.-H., Yu, C., Cao, X., Wang, Z.L.	Triboelectrification-enabled self-powered detection and removal of heavy metal ions in wastewater	2016	Advanced Materials	28	15	NA	2983	2991	NA	43	10.1002/adma.201504356	https://www.scopus.com/inward/record.url?eid=2-s2.0-84959432417&partnerID=40&md5=e228bd8a5017b2ef422d2736c990efc1	Article	NA	Scopus	Â© 2016 WILEY-VCH Verlag GmbH & Co. KGaA, Weinheim. A fundamentally new working principle into the field of self-powered heavy-metal-ion detection and removal using the triboelectrification effect is introduced. The as-developed tribo-nanosensors can selectively detect common heavy metal ions. The water-driven triboelectric nanogenerator is taken as a sustainable power source for heavy-metal-ion …	Triboelectrification-enabled self-powered detection and removal of heavy metal ions in wastewater <U+FFFD><U+FFFD> 2016 WILEY-VCH Verlag GmbH & Co. KGaA, Weinheim. A fundamentally new working principle into the field of self-powered heavy-metal-ion detection and removal using the triboelectrification effect is introduced. The as-developed tribo-nanosensors can selectively detect common heavy meta…	A fundamentally new working principle into the field of self-powered heavy-metal-ion detection and removal using the triboelectrification effect is introduced.	2-s2.0-84959432417	no		not about detections in aquatic environment
1682	20526	Kurashov, E.A., Mitrukova, G.G., Krylova, J.V., Aleshina, D.G., Bataeva, Y.V., Astafyevaf, O.V.	Low-molecular weight metabolites in Spirodela polyrhiza (L.) Scheiden from Northwest Russia in the middle of the growing season	2016	Ponte	72	10	NA	10	22	NA	NA	NA	https://www.scopus.com/inward/record.url?eid=2-s2.0-85011649824&partnerID=40&md5=0d5ec20c043ff9e5359107e32cdc0765	Article	NA	Scopus	Not much is known about the chemical composition of low-molecular weight secondary metabolites of Spirodela polyrhiza (L.) Scheiden. We aimed to investigate the composition of low molecular weight volatile organic compounds (VOCs) of S. polyrhiza in the middle of the growing season by GC-MS. A GC-MS analysis of the essential oil of fresh S. polyrhiza was undertaken for the first time. It was foun…	Low-molecular weight metabolites in Spirodela polyrhiza (L.) Scheiden from Northwest Russia in the middle of the growing season Not much is known about the chemical composition of low-molecular weight secondary metabolites of Spirodela polyrhiza (L.) Scheiden. We aimed to investigate the composition of low molecular weight volatile organic compounds (VOCs) of S. polyrhiza in the middle of the gro…	A GC-MS analysis of the essential oil of fresh S. polyrhiza was undertaken for the first time.	2-s2.0-85011649824	no		new identification method
1386	19115	Huang, H., Zhu, W., Gao, X., Liu, X., Ma, H.	Synthesis of a novel electrode material containing phytic acid-polyaniline nanofibers for simultaneous determination of cadmium and lead ions	2016	Analytica Chimica Acta	947	NA	NA	32	41	NA	9	10.1016/j.aca.2016.10.012	https://www.scopus.com/inward/record.url?eid=2-s2.0-84995680331&partnerID=40&md5=92356ea29df3e9aad36f90cfcf3d12c9	Article	NA	Scopus	Â© 2016 Elsevier B.V. The development of nanostructured conducting polymers based materials for electrochemical applications has attracted intense attention due to their environmental stability, unique reversible redox properties, abundant electron active sites, rapid electron transfer and tunable conductivity. Here, a phytic acid doped polyaniline nanofibers based nanocomposite was synthesized u…	Synthesis of a novel electrode material containing phytic acid-polyaniline nanofibers for simultaneous determination of cadmium and lead ions <U+FFFD><U+FFFD> 2016 Elsevier B.V. The development of nanostructured conducting polymers based materials for electrochemical applications has attracted intense attention due to their environmental stability, unique reversible redox properties, abundant ele…	A glassy carbon electrode modified by the nanocomposite was evaluated as a new platform for the simultaneous detection of trace amounts of Cd2+ and Pb2+ using differential pulse anodic stripping voltammetry (DPASV).	2-s2.0-84995680331	no		not about detections in aquatic environment
3335	12429	Zhang, X., Liu, Y., Gu, J.-D.	A global analysis on the distribution pattern of the bacteria coupling simultaneous methane oxidation to nitrite reduction	2018	International Biodeterioration and Biodegradation	129	NA	NA	123	132	NA	NA	10.1016/j.ibiod.2018.01.014	https://www.scopus.com/inward/record.url?eid=2-s2.0-85042597657&partnerID=40&md5=103d428b627820aa47361c5642877398	Article	NA	Scopus	Â© 2018 The dominant bacterium Candidatus Methylomirabilis oxyfera (NC10 phylum) was first identified from an enrichment culture and subsequently from various other habitats. To date, the global distribution pattern of this bacterium has not been summarized. This study analyzed the distribution pattern and diversity of nitrite-dependent anaerobic methane oxidation (n-damo) bacteria by retrieving …	A global analysis on the distribution pattern of the bacteria coupling simultaneous methane oxidation to nitrite reduction <U+FFFD><U+FFFD> 2018 The dominant bacterium Candidatus Methylomirabilis oxyfera (NC10 phylum) was first identified from an enrichment culture and subsequently from various other habitats. To date, the global distribution pattern of this bacterium has not been summarized. Thi…	A global analysis on the distribution pattern of the bacteria coupling simultaneous methane oxidation to nitrite reduction <U+FFFD><U+FFFD> 2018 The dominant bacterium Candidatus Methylomirabilis oxyfera (NC10 phylum) was first identified from an enrichment culture and subsequently from various other habitats.	2-s2.0-85042597657	no		not about detections in aquatic environment
773	4842	Gigliuto, A., Stopelli, E., Sanangelantoni, A.M., Malcevschi, A.	Coupling Flow Analysis With Geochemical and Microbiological Analyses to Assess the Bioremediation Feasibility of a Contaminated Aquifer	2016	Remediation	26	3	NA	109	129	NA	NA	10.1002/rem.21472	https://www.scopus.com/inward/record.url?eid=2-s2.0-84971576964&partnerID=40&md5=c97a81957c6addeac642a9362a75e744	Article	NA	Scopus	Â©2016 Wiley Periodicals, Inc.An integrated approach combining classic and molecular microbiological methods, \in vitro\\ bioremediation assays and groundwater numerical modeling, has been established to identify optimized solutions for remediating aquifers contaminated with organic pollutants. Bacteria have been isolated from an aquifer contaminated with toluene and methyl tert-butyl ether (MTBE…	Coupling Flow Analysis With Geochemical and Microbiological Analyses to Assess the Bioremediation Feasibility of a Contaminated Aquifer <U+FFFD><U+FFFD>2016 Wiley Periodicals, Inc.An integrated approach combining classic and molecular microbiological methods, \in vitro\\ bioremediation assays and groundwater numerical modeling, has been established to identify optimized solutions for remediating …	A groundwater model was created using FEFLOW code first to determine the movement of the plume front and second to simulate the impact of the biodegradation processes along the groundwater flow directions based on the bioremediation rates obtained in the laboratory.	2-s2.0-84971576964	no		not about detections in aquatic environment
751	5178	Huo, Y., Zeng, H.	\Sticky\\-Ends-Guided Creation of Functional Hollow Nanopores for Guest Encapsulation and Water Transport\\\""	2016	Accounts of Chemical Research	49	5	NA	922	930	NA	27	10.1021/acs.accounts.6b00051	https://www.scopus.com/inward/record.url?eid=2-s2.0-84971224774&partnerID=40&md5=1102ab7cccd66fd355ebb3b975ed3494	Article	NA	Scopus	Â© 2016 American Chemical Society.ConspectusCommercial uses of water-transporting aquaporins for seawater desalination and wastewater reclamation/reuse are being investigated in both academia and the industry. Presently, structural complexity, stability, scalability, and activity reconstitution of these costly channel proteins still present substantial challenges to scientists and engineers. An a…	\Sticky\\-Ends-Guided Creation of Functional Hollow Nanopores for Guest Encapsulation and Water Transport\\\" <U+FFFD><U+FFFD> 2016 American Chemical Society.ConspectusCommercial uses of water-transporting aquaporins for seawater desalination and wastewater reclamation/reuse are being investigated in both academia and the industry. Presently, structural complexity, stability, scalability, and act…	A handful of such examples include the first report by Percec in 2007 (Percec et al.	2-s2.0-84971224774	no		not about detections in aquatic environment
724	4590	Tong, L., Liu, H., Xie, C., Li, M.	Quantitative analysis of antibiotics in aquifer sediments by liquid chromatography coupled to high resolution mass spectrometry	2016	Journal of Chromatography A	1452	NA	NA	58	66	NA	5	10.1016/j.chroma.2016.05.027	https://www.scopus.com/inward/record.url?eid=2-s2.0-84969555219&partnerID=40&md5=d2e43c475e632acfe024b93701c1ec79	Article	NA	Scopus	Â© 2016 Elsevier B.V. A highly effective analytical method for multi-residue determination of antibiotics in aquifer sediments was first established in this study. Microwave-assisted solvent extraction (MASE) and solid-phase extraction were used for sample pre-concentration and purification, ultra-high performance liquid chromatography coupled to hybrid quadrupoleâ€”high resolution Orbitrap mass …	Quantitative analysis of antibiotics in aquifer sediments by liquid chromatography coupled to high resolution mass spectrometry <U+FFFD><U+FFFD> 2016 Elsevier B.V. A highly effective analytical method for multi-residue determination of antibiotics in aquifer sediments was first established in this study. Microwave-assisted solvent extraction (MASE) and solid-phase extraction were used for sample …	A highly effective analytical method for multi-residue determination of antibiotics in aquifer sediments was first established in this study.	2-s2.0-84969555219	no		new identification method
2835	896	Liu, S., Cheng, R., Chen, Y., Shi, H., Zhao, G.	A simple one-step pretreatment, highly sensitive and selective sensing of 17Î’-estradiol in environmental water samples using surface-enhanced Raman spectroscopy	2018	Sensors and Actuators, B: Chemical	254	NA	NA	1157	1164	NA	1	10.1016/j.snb.2017.08.003	https://www.scopus.com/inward/record.url?eid=2-s2.0-85031776890&partnerID=40&md5=8049fe98b8484ff637476a12a6ed0ce5	Article	NA	Scopus	Â© 2017 Elsevier B.V. A highly sensitive and selective aptamer-based surface-enhanced Raman spectroscopic biosensing system was established for detecting trace amount of 17Î²-estradiol (E2) for the first time, and applied in the environmental samples based on a simple one-step pretreatment. Raman reporter molecule 4-mercaptobenzoic acid labelled gold-silver core-shell nanoparticles (Au@Ag CS NPs)…	A simple one-step pretreatment, highly sensitive and selective sensing of 17<U+FFFD><U+FFFD>-estradiol in environmental water samples using surface-enhanced Raman spectroscopy <U+FFFD><U+FFFD> 2017 Elsevier B.V. A highly sensitive and selective aptamer-based surface-enhanced Raman spectroscopic biosensing system was established for detecting trace amount of 17<U+FFFD><U+FFFD>-estradiol (E2) for t…	A highly sensitive and selective aptamer-based surface-enhanced Raman spectroscopic biosensing system was established for detecting trace amount of 17<U+FFFD><U+FFFD>-estradiol (E2) for the first time, and applied in the environmental samples based on a simple one-step pretreatment.	2-s2.0-85031776890	no		new identification method
242	5597	El-Mai, H., Espada-Bellido, E., Stitou, M., GarcÃ­a-Vargas, M., Galindo-RiaÃ±o, M.D.	Determination of ultra-trace amounts of silver in water by differential pulse anodic stripping voltammetry using a new modified carbon paste electrode	2016	Talanta	151	NA	NA	14	22	NA	15	10.1016/j.talanta.2016.01.008	https://www.scopus.com/inward/record.url?eid=2-s2.0-84954519834&partnerID=40&md5=67cda494bddb716d119618b22c542558	Article	NA	Scopus	Â© 2016 Elsevier B.V. All rights reserved. A highly sensitive and selective new procedure for the determination of silver in aqueous media was developed using a modified carbon paste electrode (MCPE) by differential pulse anodic stripping voltammetry (DPASV). The modified electrode was based on the incorporation of 2-hydroxybenzaldehyde benzoylhydrazone (2-HBBH) in the carbon paste electrode. Sil…	Determination of ultra-trace amounts of silver in water by differential pulse anodic stripping voltammetry using a new modified carbon paste electrode <U+FFFD><U+FFFD> 2016 Elsevier B.V. All rights reserved. A highly sensitive and selective new procedure for the determination of silver in aqueous media was developed using a modified carbon paste electrode (MCPE) by differential pulse anodic strip…	A highly sensitive and selective new procedure for the determination of silver in aqueous media was developed using a modified carbon paste electrode (MCPE) by differential pulse anodic stripping voltammetry (DPASV).	2-s2.0-84954519834	no		new identification method
1803	4376	Munk, B., Guebitz, G.M., Lebuhn, M.	Influence of nitrogen-rich substrates on biogas production and on the methanogenic community under mesophilic and thermophilic conditions	2017	Anaerobe	46	NA	NA	146	154	NA	2	10.1016/j.anaerobe.2017.02.015	https://www.scopus.com/inward/record.url?eid=2-s2.0-85014055795&partnerID=40&md5=d1695e4627c09ad3016159fcf43c6017	Article	NA	Scopus	Â© 2017 Elsevier LtdGrass silage was evaluated as a possible substrate in anaerobic digestion for generation of biogas in mesophilic and thermophilic long-term operation. Furthermore, the molecular biological parameter Metabolic Quotient (MQ) was evaluated as early warning system to predict process disturbance. Since this substrate is rich in nitrogen, high ammonia concentration of up to 2.2 g * …	Influence of nitrogen-rich substrates on biogas production and on the methanogenic community under mesophilic and thermophilic conditions <U+FFFD><U+FFFD> 2017 Elsevier LtdGrass silage was evaluated as a possible substrate in anaerobic digestion for generation of biogas in mesophilic and thermophilic long-term operation. Furthermore, the molecular biological parameter Metabolic Quotient (MQ) was …	A hitherto uncultivated genospecies, Methanobacteriaceae genus IV(B) sp. 3 was determined as possible new bioindicator for mesophilic process disturbance.	2-s2.0-85014055795	no		new bioindicator
2587	4935	Ghorbani, M., Chamsaz, M., Rounaghi, G.H.	Glycine functionalized multiwall carbon nanotubes as a novel hollow fiber solid-phase microextraction sorbent for pre-concentration of venlafaxine and o-desmethylvenlafaxine in biological and water samples prior to determination by high-performance liquid chromatography	2016	Analytical and Bioanalytical Chemistry	408	16	NA	4247	4256	NA	12	10.1007/s00216-016-9518-8	https://www.scopus.com/inward/record.url?eid=2-s2.0-85027953565&partnerID=40&md5=8259fe1622db7a74500dcb7403c0419c	Article	NA	Scopus	Â© 2016, Springer-Verlag Berlin Heidelberg. A hollow fiber solid-phase microextraction method for pre-concentration of venlafaxine and o-desmethylvenlafaxine in biological matrices is described for the first time. The functionalized MWCNTs with an amino acid, glycine, were synthesized and held in the pore of a hollow fiber by solâ€“gel technique. In order to extract venlafaxine and o-desmethylven…	Glycine functionalized multiwall carbon nanotubes as a novel hollow fiber solid-phase microextraction sorbent for pre-concentration of venlafaxine and o-desmethylvenlafaxine in biological and water samples prior to determination by high-performance liquid chromatography <U+FFFD><U+FFFD> 2016, Springer-Verlag Berlin Heidelberg. A hollow fiber solid-phase microextraction method for pre-concentratio…	A hollow fiber solid-phase microextraction method for pre-concentration of venlafaxine and o-desmethylvenlafaxine in biological matrices is described for the first time.	2-s2.0-85027953565	no		new identification method
3206	12122	Tan, L., Li, L., Ashbolt, N., Wang, X., Cui, Y., Zhu, X., Xu, Y., Yang, Y., Mao, D., Luo, Y.	Arctic antibiotic resistance gene contamination, a result of anthropogenic activities and natural origin	2018	Science of the Total Environment	621	NA	NA	1176	1184	NA	3	10.1016/j.scitotenv.2017.10.110	https://www.scopus.com/inward/record.url?eid=2-s2.0-85041213966&partnerID=40&md5=181e1b0fbd6d49a7c2907b1cf7109fc2	Article	NA	Scopus	Â© 2017 Elsevier B.V. The increasing global prevalence of antibiotic resistance genes (ARGs) in the environment is attributed to anthropogenic activities, particularly the misuse of antimicrobial drugs in human care and animal production. In the present study, we first examined Arctic/sub-Arctic (polar) sediments for the abundance and diversity of 30 ARGs against sulfonamide, tetracycline, aminog…	Arctic antibiotic resistance gene contamination, a result of anthropogenic activities and natural origin <U+FFFD><U+FFFD> 2017 Elsevier B.V. The increasing global prevalence of antibiotic resistance genes (ARGs) in the environment is attributed to anthropogenic activities, particularly the misuse of antimicrobial drugs in human care and animal production. In the present study, we first examined A…	A human mitochondrial gene target, Hmt, was first used to aid in the identification of ARGs associated with anthropogenic activities, being relatively persistent, in high copy number and a human-specific molecular marker.	2-s2.0-85041213966	no		new identification method
2112	4548	Zhang, Y., MirÃ³, M., Kolev, S.D.	An automatic flow assembly for on-line dynamic fractionation of trace level concentrations of mercury in environmental solids with high organic load	2017	Analytica Chimica Acta	975	NA	NA	1	10	NA	3	10.1016/j.aca.2017.05.001	https://www.scopus.com/inward/record.url?eid=2-s2.0-85019060278&partnerID=40&md5=6ebb510f68117f6890491a19d98e517b	Article	NA	Scopus	Â© 2017 Elsevier B.V. A hybrid and compact flow system for automatic assessment of trace level concentrations of bioaccessible mercury in different phases of environmental solid samples with high organic load is described for the first time. It integrates dynamic sequential extraction with on-line digestion of the extracts and atomic fluorescence spectrometric detection of their total bioaccessib…	An automatic flow assembly for on-line dynamic fractionation of trace level concentrations of mercury in environmental solids with high organic load <U+FFFD><U+FFFD> 2017 Elsevier B.V. A hybrid and compact flow system for automatic assessment of trace level concentrations of bioaccessible mercury in different phases of environmental solid samples with high organic load is described for the first …	A hybrid and compact flow system for automatic assessment of trace level concentrations of bioaccessible mercury in different phases of environmental solid samples with high organic load is described for the first time.	2-s2.0-85019060278	no		new identification method
1797	14226	Turner, S., Avery, S.	A Jurassic non-marine chondrichthyan in Australia and its palaeogeographic significance	2017	Palaeoworld	26	2	NA	268	278	NA	3	10.1016/j.palwor.2017.01.001	https://www.scopus.com/inward/record.url?eid=2-s2.0-85013831022&partnerID=40&md5=bd7df6d27e8a553e79adb6e0db0d9776	Article	NA	Scopus	Â© 2017 Elsevier Ireland Ltd Elsevier B.V. and Nanjing Institute of Geology and Palaeontology, CAS After the demise of many fish taxa including xenacanth sharks before the Late Triassic, non-marine fish faunas reappeared in Australia the mid-Jurassic in the East Gondwana component of Pangaea with one new chondrichthyan occurring in the Late Jurassic freshwater Talbragar LagerstÃ¤tten near Gulgong…	A Jurassic non-marine chondrichthyan in Australia and its palaeogeographic significance <U+FFFD><U+FFFD> 2017 Elsevier Ireland Ltd Elsevier B.V. and Nanjing Institute of Geology and Palaeontology, CAS After the demise of many fish taxa including xenacanth sharks before the Late Triassic, non-marine fish faunas reappeared in Australia the mid-Jurassic in the East Gondwana component of Pangaea with…	A Jurassic non-marine chondrichthyan in Australia and its palaeogeographic significance <U+FFFD><U+FFFD> 2017 Elsevier Ireland Ltd Elsevier B.V. and Nanjing Institute of Geology and Palaeontology, CAS After the demise of many fish taxa including xenacanth sharks before the Late Triassic, non-marine fish faunas reappeared in Australia the mid-Jurassic in the East Gondwana component of Pangaea with…	2-s2.0-85013831022	no		not about detections in aquatic environment
1565	15209	Wang, Y., Sha, L., Zhao, J., Li, Q., Zhu, Y., Wang, N.	Antibacterial property of fabrics coated by magnesium-based brucites	2017	Applied Surface Science	400	NA	NA	413	419	NA	4	10.1016/j.apsusc.2016.12.188	https://www.scopus.com/inward/record.url?eid=2-s2.0-85007591307&partnerID=40&md5=f1da8fa3139e47dca62172648bcaf098	Article	NA	Scopus	Â© 2016 Elsevier B.V. A kind of environmental-friendly magnesium-based antibacterial agent was reported for the first time, which was composited by brucites with different particle sizes. The antibacterial fabrics were produced by coating the magnesium-based antibacterial agents on the 260T polyester pongee fabrics with waterborne polyurethane. The coating process was simple, low-cost, and harmle…	Antibacterial property of fabrics coated by magnesium-based brucites <U+FFFD><U+FFFD> 2016 Elsevier B.V. A kind of environmental-friendly magnesium-based antibacterial agent was reported for the first time, which was composited by brucites with different particle sizes. The antibacterial fabrics were produced by coating the magnesium-based antibacterial agents on the 260T polyester pongee fabrics…	A kind of environmental-friendly magnesium-based antibacterial agent was reported for the first time, which was composited by brucites with different particle sizes.	2-s2.0-85007591307	no		not about detections in aquatic environment
3958	1470	GonzÃ¡lez-Bourguet, B.J., RuÃ­z-Valdiviezo, V.M., HernÃ¡ndez-GuzmÃ¡n, M., Delgado-Balbuena, L., Luna-Guido, M., Dendooven, L.	Removal of toluene from two contrasting soils, an agriculturalsoil and an alkaline soil	2018	Revista Internacional de Contaminacion Ambiental	34	3	NA	417	425	NA	NA	10.20937/RICA.2018.34.03.05	https://www.scopus.com/inward/record.url?eid=2-s2.0-85051195203&partnerID=40&md5=6ed12ab52ce110a40d63717beccab630	Article	NA	Scopus	Â© 2018, Centro de Ciencias de la Atmosfera, UNAM. All rights reserved. Among the most serious environmental disasters that threaten biodiversity in soil are oil spills.Different factors control the removal of hydrocarbons from soil, e.g., soil characteristics, composition of the contaminant, and the composition of the microbial population. Toluene is highly volatile, toxic and soluble in water s…	Removal of toluene from two contrasting soils, an agriculturalsoil and an alkaline soil <U+FFFD><U+FFFD> 2018, Centro de Ciencias de la Atmosfera, UNAM. All rights reserved. Among the most serious environmental disasters that threaten biodiversity in soil are oil spills.Different factors control the removal of hydrocarbons from soil, e.g., soil characteristics, composition of the contaminant, and…	A lag of two days between dissipation and mineralization was detected, as toluene first has to be incorporated in the microbial cell before it can be degraded.	2-s2.0-85051195203	no		not about detections in aquatic environment
1544	2876	Javier Benitez, F., Real, F.J., Acero, J.L., Casas, F.	Assessment of the UV/Cl<inf>2</inf>advanced oxidation process for the degradation of the emerging contaminants amitriptyline hydrochloride, methyl salicylate and 2-phenoxyethanol in water systems	2017	Environmental Technology (United Kingdom)	38	20	NA	2508	2516	NA	NA	10.1080/09593330.2016.1269836	https://www.scopus.com/inward/record.url?eid=2-s2.0-85007305406&partnerID=40&md5=632bd92ee909a365f1e9e8395195a5aa	Article	NA	Scopus	Â© 2016 Informa UK Limited, trading as Taylor & Francis Group. Three emerging contaminants (amitriptyline hydrochloride (AH), methyl salicylate (MS) and 2-phenoxyethanol (PE)) frequently found in wastewaters were selected to be individually degraded in ultra-pure water by the advanced oxidation process (AOP) constituted by the combination of UV radiation and chlorine. The influence of pH, initial…	Assessment of the UV/Cl<inf>2</inf>advanced oxidation process for the degradation of the emerging contaminants amitriptyline hydrochloride, methyl salicylate and 2-phenoxyethanol in water systems <U+FFFD><U+FFFD> 2016 Informa UK Limited, trading as Taylor & Francis Group. Three emerging contaminants (amitriptyline hydrochloride (AH), methyl salicylate (MS) and 2-phenoxyethanol (PE)) frequently fo…	A later kinetic study was carried out focused on the evaluation of the first-order rate constants and the determination of the partial contribution to the global reaction of the direct photochemical pathway and the radical pathway.	2-s2.0-85007305406	no		not about detections in aquatic environment
482	4805	Sharma, S., Malaviya, P.	Bioremediation of tannery wastewater by chromium resistant novel fungal consortium	2016	Ecological Engineering	91	NA	NA	419	425	NA	10	10.1016/j.ecoleng.2016.03.005	https://www.scopus.com/inward/record.url?eid=2-s2.0-84960925213&partnerID=40&md5=e0ac1a9300a388134c8fa39b320c82ce	Article	NA	Scopus	Â© 2016 Elsevier B.V..A consortium of four Cr-resistant ascomycetous fungi (Cladosporeum perangustum and Penicillium commune - isolated from tannery wastewater contaminated soil; Paecilomyces lilacinus and Fusarium equiseti - isolated from tannery sludge) was employed for tannery wastewater bioremediation. For construction of immobilized fungal consortium, various natural as well as synthetic sup…	Bioremediation of tannery wastewater by chromium resistant novel fungal consortium <U+FFFD><U+FFFD> 2016 Elsevier B.V..A consortium of four Cr-resistant ascomycetous fungi (Cladosporeum perangustum and Penicillium commune - isolated from tannery wastewater contaminated soil; Paecilomyces lilacinus and Fusarium equiseti - isolated from tannery sludge) was employed for tannery wastewater bioremedia…	A major part of reduction in these parameters occurred within first 24 h of the treatment.	2-s2.0-84960925213	no		not about detections in aquatic environment
930	21778	Jakob, E., Walter, T., Hanel, R.	A checklist of the protozoan and metazoan parasites of European eel (Anguilla anguilla): checklist of Anguilla anguilla parasites	2016	Journal of Applied Ichthyology	32	4	NA	757	804	NA	8	10.1111/j.1439-0426.2009.01345.x	https://www.scopus.com/inward/record.url?eid=2-s2.0-84978474550&partnerID=40&md5=4e3df5238e965b21b7c47cab7aa496c1	Article	NA	Scopus	Â© 2009 The Authors Journal compilation Â© 2009 Blackwell Verlag, Berlin A comprehensive literature review on prevalence and distribution of parasites of the European eel (Anguilla anguilla) in European waters was conducted to set a baseline for future trend analyses and biodiversity considerations. The resulting checklist compiled from peer reviewed journals as well as grey literature including …	A checklist of the protozoan and metazoan parasites of European eel (Anguilla anguilla): checklist of Anguilla anguilla parasites <U+FFFD><U+FFFD> 2009 The Authors Journal compilation <U+FFFD><U+FFFD> 2009 Blackwell Verlag, Berlin A comprehensive literature review on prevalence and distribution of parasites of the European eel (Anguilla anguilla) in European waters was conducted to set a baseline…	A map and table of first reported records of this neozoan parasite species for 25 countries as well as a survey map indicating all published localities documented in the checklist are provided.	2-s2.0-84978474550	yes	MB	new detection in biota
909	22096	Sampaio, B.L., Edrada-Ebel, R., Da Costa, F.B.	Effect of the environment on the secondary metabolic profile of Tithonia diversifolia: A model for environmental metabolomics of plants	2016	Scientific Reports	6	NA	29265	NA	NA	NA	39	10.1038/srep29265	https://www.scopus.com/inward/record.url?eid=2-s2.0-84978171036&partnerID=40&md5=3a356b9c3aa2f6e426099bb1db3358d9	Article	NA	Scopus	Tithonia diversifolia is an invasive weed commonly found in tropical ecosystems. In this work, we investigate the influence of different abiotic environmental factors on the plant's metabolite profile by multivariate statistical analyses of spectral data deduced by UHPLC-DAD-ESI-HRMS and NMR methods. Different plant part samples of T. diversifolia which included leaves, stems, roots, and inflores…	Effect of the environment on the secondary metabolic profile of Tithonia diversifolia: A model for environmental metabolomics of plants Tithonia diversifolia is an invasive weed commonly found in tropical ecosystems. In this work, we investigate the influence of different abiotic environmental factors on the plant's metabolite profile by multivariate statistical analyses of spectral data deduced …	A metabolomic approach employing concatenated LC-MS and NMR data was utilised for the first time to study the relationships between environment and plant metabolism.	2-s2.0-84978171036	no		not about detections in aquatic environment
2821	2203	Nesterenko, G.V., Zhmodik, S.M., Airiyants, E.V., Belyanin, D.K., Kolpakov, V.V., Bogush, A.A.	Colloform high-purity platinum from the placer deposit of Koura River (Gornaya Shoriya, Russia)	2017	Ore Geology Reviews	91	NA	NA	236	245	NA	NA	10.1016/j.oregeorev.2017.10.003	https://www.scopus.com/inward/record.url?eid=2-s2.0-85031429543&partnerID=40&md5=ce7204676693a284d9715610c108a176	Article	NA	Scopus	Â© 2017 Elsevier B.V. A microinclusion of colloform high-purity platinum in a grain of platinum-group minerals (PGM) from the alluvial gold-bearing placer deposit in the south of Western Siberia (Russia) was detected and characterized for the first time. It is different in composition, texture, and conditions of formation from high-purity platinum of other regions described in the literature. The…	Colloform high-purity platinum from the placer deposit of Koura River (Gornaya Shoriya, Russia) <U+FFFD><U+FFFD> 2017 Elsevier B.V. A microinclusion of colloform high-purity platinum in a grain of platinum-group minerals (PGM) from the alluvial gold-bearing placer deposit in the south of Western Siberia (Russia) was detected and characterized for the first time. It is different in composition, te…	A microinclusion of colloform high-purity platinum in a grain of platinum-group minerals (PGM) from the alluvial gold-bearing placer deposit in the south of Western Siberia (Russia) was detected and characterized for the first time.	2-s2.0-85031429543	no		not about detections in aquatic environment
2865	12093	Wang, J., Niu, Y., Zhang, C., Chen, Y.	A micro-plate colorimetric assay for rapid determination of trace zinc in animal feed, pet food and drinking water by ion masking and statistical partitioning correction	2018	Food Chemistry	245	NA	NA	337	345	NA	NA	10.1016/j.foodchem.2017.10.054	https://www.scopus.com/inward/record.url?eid=2-s2.0-85032285394&partnerID=40&md5=93fa048cadc5de2b597e37e476419f04	Article	NA	Scopus	Â© 2017 Elsevier Ltd A new micro-plate colorimetric assay was developed for rapid determination of zinc in animal feed, pet food and drinking water. Zinc ion was extracted from sample by trichloroacetic acid and then reacted with 2-(5-Bromo-2-pyridylazo)-5-[N-propyl-N-(3-sulfopropyl)amino]phenol (5-Br-PAPS) to form a Zn-PAPS complex to be detected by a micro-plate reader at 552 nm. An ion masking…	A micro-plate colorimetric assay for rapid determination of trace zinc in animal feed, pet food and drinking water by ion masking and statistical partitioning correction <U+FFFD><U+FFFD> 2017 Elsevier Ltd A new micro-plate colorimetric assay was developed for rapid determination of zinc in animal feed, pet food and drinking water. Zinc ion was extracted from sample by trichloroacetic acid and the…	A micro-plate colorimetric assay for rapid determination of trace zinc in animal feed, pet food and drinking water by ion masking and statistical partitioning correction <U+FFFD><U+FFFD> 2017 Elsevier Ltd A new micro-plate colorimetric assay was developed for rapid determination of zinc in animal feed, pet food and drinking water.	2-s2.0-85032285394	no		not about detections in aquatic environment
1186	18252	Pan, Z., Zhao, L., Boufadel, M.C., King, T., Robinson, B., Conmy, R., Lee, K.	Impact of mixing time and energy on the dispersion effectiveness and droplets size of oil	2017	Chemosphere	166	NA	NA	246	254	NA	6	10.1016/j.chemosphere.2016.09.052	https://www.scopus.com/inward/record.url?eid=2-s2.0-84989158698&partnerID=40&md5=d5d90ec28e647d397e9b9882657e29f4	Article	NA	Scopus	Â© 2016 Elsevier Ltd The effects of mixing time and energy on Alaska Northern Slope (ANS) and diluted bitumen Cold Lake Blend (CLB) were investigated using EPA baffled flask test. Dispersion effectiveness and droplet size distribution were measured after 5â€“120 min. A modeling method to predict the mean droplet size was introduced for the first time to tentatively elucidate the droplet size brea…	Impact of mixing time and energy on the dispersion effectiveness and droplets size of oil <U+FFFD><U+FFFD> 2016 Elsevier Ltd The effects of mixing time and energy on Alaska Northern Slope (ANS) and diluted bitumen Cold Lake Blend (CLB) were investigated using EPA baffled flask test. Dispersion effectiveness and droplet size distribution were measured after 5<U+FFFD><U+FFFD><U+FFFD>120 min. A mode…	A modeling method to predict the mean droplet size was introduced for the first time to tentatively elucidate the droplet size breakup mechanism.	2-s2.0-84989158698	no		not about detections in aquatic environment
407	8916	Scorpio, V., Loy, A., Di Febbraro, M., Rizzo, A., Aucelli, P.	Hydromorphology Meets Mammal Ecology: River Morphological Quality, Recent Channel Adjustments and Otter Resilience	2016	River Research and Applications	32	3	NA	267	279	NA	10	10.1002/rra.2848	https://www.scopus.com/inward/record.url?eid=2-s2.0-84959349406&partnerID=40&md5=4a0ec3d40726143debbe72eb14e5e842	Article	NA	Scopus	Â© 2016 John Wiley & Sons, Ltd. The need for a multidisciplinary approach for characterizing water bodies in terms of morphological, chemical and ecological quality has hastened the growth of hydromorphology as a cross-disciplinary topic at the interface of hydrology, geomorphology and ecology. Many authors have analysed how hydroecology may affect freshwater biodiversity, although little is know…	Hydromorphology Meets Mammal Ecology: River Morphological Quality, Recent Channel Adjustments and Otter Resilience <U+FFFD><U+FFFD> 2016 John Wiley & Sons, Ltd. The need for a multidisciplinary approach for characterizing water bodies in terms of morphological, chemical and ecological quality has hastened the growth of hydromorphology as a cross-disciplinary topic at the interface of hydrology, g…	A more detailed analysis of channel adjustments showed a detrimental effect of channel incision (>3m) and a positive effect of narrowing, particularly where it occurred simultaneously with the development of forest in the new floodplain.	2-s2.0-84959349406	no		not about detections in aquatic environment
2492	18397	ChachuÅ‚a, P., Fiedor, M., Ronikier, A.	First record of a cold-period myxomycete species Dianema depressum (Lister) Lister in Poland	2017	Acta Mycologica	52	1	1095	NA	NA	NA	NA	10.5586/am.1095	https://www.scopus.com/inward/record.url?eid=2-s2.0-85026727146&partnerID=40&md5=6ec509e5b31ca591e148ed429a18d0df	Article	Open Access	Scopus	Â© The Author(s) 2017. A myxomycete species, Dianema depressum is reported for the first time in Poland. It has been found in the Jaszowiec stream valley, localized in the Beskid ÅšlÄ…ski Mts (the Carpathians) in November 2015. The cool period seems to be the typical time of the speciesâ€™ occurrence.	First record of a cold-period myxomycete species Dianema depressum (Lister) Lister in Poland <U+FFFD><U+FFFD> The Author(s) 2017. A myxomycete species, Dianema depressum is reported for the first time in Poland. It has been found in the Jaszowiec stream valley, localized in the Beskid <U+FFFD><U+FFFD>l<U+FFFD><U+FFFD>ski Mts (the Carpathians) in November 2015. The cool period seems to be the typi…	A myxomycete species, Dianema depressum is reported for the first time in Poland.	2-s2.0-85026727146	yes	MB	new species detection, not a microorganism??
3574	11807	Coutinho, P.E.G., Candido, L.A., Tadei, W.P., da Silva Junior, U.L., Correa, H.K.M.	An analysis of the influence of the local effects of climatic and hydrological factors affecting new malaria cases in riverine areas along the Rio Negro and surrounding Puraquequara Lake, Amazonas, Brazil	2018	Environmental Monitoring and Assessment	190	5	311	NA	NA	NA	NA	10.1007/s10661-018-6677-4	https://www.scopus.com/inward/record.url?eid=2-s2.0-85046103695&partnerID=40&md5=48249c30f8b19e51910416885fd3ab5c	Article	NA	Scopus	Â© 2018, Springer International Publishing AG, part of Springer Nature. A study was conducted at three sampling regions along the Rio Negro and surrounding Puraquequara Lake, Amazonas, Brazil. The aim was to determine the influence of the local effects of climatic and hydrological variables on new malaria cases. Data was gathered on the river level, precipitation, air temperature, and the number …	An analysis of the influence of the local effects of climatic and hydrological factors affecting new malaria cases in riverine areas along the Rio Negro and surrounding Puraquequara Lake, Amazonas, Brazil <U+FFFD><U+FFFD> 2018, Springer International Publishing AG, part of Springer Nature. A study was conducted at three sampling regions along the Rio Negro and surrounding Puraquequara Lake, Amazo…	A negative temperature correlation is associated with the occurrence of new annual post-peak cases of malaria, when the monthly average exceeds 28.5 <U+FFFD><U+FFFD>C.	2-s2.0-85046103695	no		not about detections in aquatic environment
1628	14904	Chisvert, A., BenedÃ©, J.L., PeirÃ³, M., PedrÃ³n, I., Salvador, A.	Determination of N-nitrosodiethanolamine in cosmetic products by reversed-phase dispersive liquid-liquid microextraction followed by liquid chromatography	2017	Talanta	166	NA	NA	81	86	NA	3	10.1016/j.talanta.2017.01.037	https://www.scopus.com/inward/record.url?eid=2-s2.0-85009923622&partnerID=40&md5=65d68ec9ab5415e275fcb71f40761c3d	Article	NA	Scopus	Â© 2017 Elsevier B.V. A new analytical method for the determination of N-nitrosodiethanolamine (NDELA), a very harmful compound not allowed in cosmetic products, is presented. The method is based on a new approach of dispersive liquidâ€“liquid microextraction (DLLME) useful for extraction of highly polar compounds, called reversed-phase DLLME (RP-DLLME), followed by liquid chromatographyâ€“ultrav…	Determination of N-nitrosodiethanolamine in cosmetic products by reversed-phase dispersive liquid-liquid microextraction followed by liquid chromatography <U+FFFD><U+FFFD> 2017 Elsevier B.V. A new analytical method for the determination of N-nitrosodiethanolamine (NDELA), a very harmful compound not allowed in cosmetic products, is presented. The method is based on a new approach of dispersive li…	A new analytical method for the determination of N-nitrosodiethanolamine (NDELA), a very harmful compound not allowed in cosmetic products, is presented.	2-s2.0-85009923622	no		new identification method
1245	20174	Necibi, M., Lanceleur, L., Mzoughi, N., Monperrus, M.	Determination of Synthetic Musks in Surface Sediment from the Bizerte Lagoon by QuEChERS Extraction Followed by GC-MS	2016	Bulletin of Environmental Contamination and Toxicology	97	5	NA	659	669	NA	3	10.1007/s00128-016-1935-z	https://www.scopus.com/inward/record.url?eid=2-s2.0-84991112154&partnerID=40&md5=4e6d1b560c5a208e41a72684b1ed2747	Article	NA	Scopus	Â© 2016, Springer Science+Business Media New York. A new analytical method for the simultaneous determination of eight synthetic musks compounds (SMs) including five polycyclic musks (PCMs) and three nitro musks (NMs) was validated for sediment samples based on a simple QuEChERS (Quick, Easy, Cheap, Effective, Rugged and Safe) sample preparation procedure followed by gas chromatographyâ€“mass spe…	Determination of Synthetic Musks in Surface Sediment from the Bizerte Lagoon by QuEChERS Extraction Followed by GC-MS <U+FFFD><U+FFFD> 2016, Springer Science+Business Media New York. A new analytical method for the simultaneous determination of eight synthetic musks compounds (SMs) including five polycyclic musks (PCMs) and three nitro musks (NMs) was validated for sediment samples based on a sim…	A new analytical method for the simultaneous determination of eight synthetic musks compounds (SMs) including five polycyclic musks (PCMs) and three nitro musks (NMs) was validated for sediment samples based on a simple QuEChERS (Quick, Easy, Cheap, Effective, Rugged and Safe) sample preparation procedure followed by gas chromatography<U+FFFD><U+FFFD><U+FFFD>mass spectrometry (GC<U+FFFD><U+FFFD><…	2-s2.0-84991112154	no		new identification method
1129	19767	Guan, J., Zhang, C., Wang, Y., Guo, Y., Huang, P., Zhao, L.	Simultaneous determination of 12 pharmaceuticals in water samples by ultrasound-assisted dispersive liquidâ€“liquid microextraction coupled with ultra-high performance liquid chromatography with tandem mass spectrometry	2016	Analytical and Bioanalytical Chemistry	408	28	NA	8099	8109	NA	11	10.1007/s00216-016-9913-1	https://www.scopus.com/inward/record.url?eid=2-s2.0-84986267160&partnerID=40&md5=a62fadbbca40e9a83b0c9ed5639289f3	Article	NA	Scopus	Â© 2016, Springer-Verlag Berlin Heidelberg.A new analytical method was developed for simultaneous determination of 12 pharmaceuticals using ultrasound-assisted dispersive liquidâ€“liquid microextraction (DLLME) followed by ultra-high performance liquid chromatography with tandem mass spectrometry (UHPLC-MS/MS). Six nonsteroidal anti-inflammatory drugs (NSAIDs, ketoprofen, mefenamic acid, tolfenam…	Simultaneous determination of 12 pharmaceuticals in water samples by ultrasound-assisted dispersive liquid<U+FFFD><U+FFFD><U+FFFD>liquid microextraction coupled with ultra-high performance liquid chromatography with tandem mass spectrometry <U+FFFD><U+FFFD> 2016, Springer-Verlag Berlin Heidelberg.A new analytical method was developed for simultaneous determination of 12 pharmaceuticals using ultr…	A new analytical method was developed for simultaneous determination of 12 pharmaceuticals using ultrasound-assisted dispersive liquid<U+FFFD><U+FFFD><U+FFFD>liquid microextraction (DLLME) followed by ultra-high performance liquid chromatography with tandem mass spectrometry (UHPLC-MS/MS).	2-s2.0-84986267160	no		new identification method
2786	3078	Cui, W., Fan, L., Geng, L., An, M., Zhang, F.	A new and facile strategy for determination of lead and cadmium using silver electrodes manufactured from digital versatile discs	2017	Chemical Research in Chinese Universities	33	5	NA	799	803	NA	NA	10.1007/s40242-017-7010-4	https://www.scopus.com/inward/record.url?eid=2-s2.0-85030704793&partnerID=40&md5=0880c7caaef3908cb7e4f113f2df0047	Article	NA	Scopus	Â© 2017, Jilin University, The Editorial Department of Chemical Research in Chinese Universities and Springer-Verlag GmbH Germany.The use of a digital versatile disc(DVD)-based Ag electrode for the square-wave anodic stripping voltammetric determination of Pb2+ and Cd2+ was described. The effect of Iâ€“ on the stripping analysis of Pb2+ and Cd2+ at Ag electrodes was first studied. Iâ€“ significan…	A new and facile strategy for determination of lead and cadmium using silver electrodes manufactured from digital versatile discs <U+FFFD><U+FFFD> 2017, Jilin University, The Editorial Department of Chemical Research in Chinese Universities and Springer-Verlag GmbH Germany.The use of a digital versatile disc(DVD)-based Ag electrode for the square-wave anodic stripping voltammetric determination o…	A new and facile strategy for determination of lead and cadmium using silver electrodes manufactured from digital versatile discs <U+FFFD><U+FFFD> 2017, Jilin University, The Editorial Department of Chemical Research in Chinese Universities and Springer-Verlag GmbH Germany.	2-s2.0-85030704793	no		new identification method
580	8824	Rokni, K., Ahmad, A., Solaimani, K., Hazini, S.	A New Approach for Detection of Surface Water Changes Based on Principal Component Analysis of Multitemporal Normalized Difference Water Index	2016	Journal of Coastal Research	32	2	NA	443	451	NA	NA	10.2112/JCOASTRES-D-14-00006.1	https://www.scopus.com/inward/record.url?eid=2-s2.0-84962516388&partnerID=40&md5=6d19c443efcaa4d0fa07e6eefd9b9141	Article	NA	Scopus	Â© Coastal Education and Research Foundation, Inc. 2016.Normally, to detect surface water changes, water features are extracted individually using multitemporal satellite data, and then, those data are analyzed and compared to detect their changes. In this study, a new approach, called normalized difference water index-principle components (NDWI-PCs), is introduced for detecting surface water cha…	A New Approach for Detection of Surface Water Changes Based on Principal Component Analysis of Multitemporal Normalized Difference Water Index <U+FFFD><U+FFFD> Coastal Education and Research Foundation, Inc. 2016.Normally, to detect surface water changes, water features are extracted individually using multitemporal satellite data, and then, those data are analyzed and compared to detect their ch…	A New Approach for Detection of Surface Water Changes Based on Principal Component Analysis of Multitemporal Normalized Difference Water Index <U+FFFD><U+FFFD> Coastal Education and Research Foundation, Inc.	2-s2.0-84962516388	no		not about detections in aquatic environment
2411	13770	Adushkin, V.V., Riabova, S.A., Spivak, A.A.	Lunarâ€“solar tide effects in the Earthâ€™s crust and atmosphere	2017	Izvestiya, Physics of the Solid Earth	53	4	NA	565	580	NA	NA	10.1134/S1069351317040012	https://www.scopus.com/inward/record.url?eid=2-s2.0-85023740781&partnerID=40&md5=4aa65606d61a2c01c616fa2f89bdafcd	Article	NA	Scopus	Â© 2017, Pleiades Publishing, Ltd. The gravitational interaction in the Earthâ€“Moonâ€“Sun system is considered from the standpoint of influencing the formation of time variations in the geophysical fields and some natural processes. The analysis of the results of instrumental observations revealed the main periodicities and cycles in the time variations of subsoil radon volumetric activity with …	Lunar<U+FFFD><U+FFFD><U+FFFD>solar tide effects in the Earth<U+FFFD><U+FFFD><U+FFFD>s crust and atmosphere <U+FFFD><U+FFFD> 2017, Pleiades Publishing, Ltd. The gravitational interaction in the Earth<U+FFFD><U+FFFD><U+FFFD>Moon<U+FFFD><U+FFFD><U+FFFD>Sun system is considered from the standpoint of influencing the formation of time variations in the geophysical fields and some natural processes. Th…	A new approach is suggested for identifying tidal waves in the atmosphere by analyzing micropulsations of the atmospheric pressure with the use of adaptive rejection filters.	2-s2.0-85023740781	no		not about detections in aquatic environment
728	20988	Franquelo, M.L., Perez-Rodriguez, J.L.	A new approach to the determination of the synthetic or natural origin of red pigments through spectroscopic analysis	2016	Spectrochimica Acta - Part A: Molecular and Biomolecular Spectroscopy	166	NA	NA	103	111	NA	5	10.1016/j.saa.2016.04.054	https://www.scopus.com/inward/record.url?eid=2-s2.0-84969591492&partnerID=40&md5=06aa30a7f62334c217874715243dfbac	Article	NA	Scopus	Â© 2016 Elsevier B.V. All rights reserved. This work suggests a way of differentiation between the natural or synthetic origin of inorganic materials that were historically used in the Cultural Heritage field. An exhaustive review of different reported procedures of synthesis of pigments was conducted, as well as a review of the accompanying minerals in case of natural pigments. The natural or sy…	A new approach to the determination of the synthetic or natural origin of red pigments through spectroscopic analysis <U+FFFD><U+FFFD> 2016 Elsevier B.V. All rights reserved. This work suggests a way of differentiation between the natural or synthetic origin of inorganic materials that were historically used in the Cultural Heritage field. An exhaustive review of different reported procedures of …	A new approach to the determination of the synthetic or natural origin of red pigments through spectroscopic analysis <U+FFFD><U+FFFD> 2016 Elsevier B.V.	2-s2.0-84969591492	no		new identification method
2079	17005	Liu, Y., Liu, Y., Xu, L., Li, J., Liu, X., Liu, J., Li, G.	Highly selective, colorimetric detection of Hg<sup>2+</sup>based on three color changes of AuNPs solution from red through sandy beige to celandine green	2017	Sensors and Actuators, B: Chemical	249	NA	NA	331	338	NA	9	10.1016/j.snb.2017.04.116	https://www.scopus.com/inward/record.url?eid=2-s2.0-85018649114&partnerID=40&md5=90d8437805007bd0c338750cc0b71e2c	Article	NA	Scopus	Â© 2017 Elsevier B.V. A new colorimetric method of detecting Hg2+ in aqueous solutions was proposed, based on the three color changes of gold nanoparticles (AuNPs) with the assistance of ascorbic acid (AA) and multi-sulfhydryl functionalized hyperbranched polyethylenimine (SH-HPEI). The mechanism of sensing is based on the formation of Au-Hg alloy and its aggregation, along with the corresponding…	Highly selective, colorimetric detection of Hg<sup>2+</sup>based on three color changes of AuNPs solution from red through sandy beige to celandine green <U+FFFD><U+FFFD> 2017 Elsevier B.V. A new colorimetric method of detecting Hg2+ in aqueous solutions was proposed, based on the three color changes of gold nanoparticles (AuNPs) with the assistance of ascorbic acid (AA) and multi-sulfhydryl func…	A new colorimetric method of detecting Hg2+ in aqueous solutions was proposed, based on the three color changes of gold nanoparticles (AuNPs) with the assistance of ascorbic acid (AA) and multi-sulfhydryl functionalized hyperbranched polyethylenimine (SH-HPEI).	2-s2.0-85018649114	no		new identification method
3432	9975	Li, H., Bai, H., Lv, Q., Wang, W., Wang, Z., Wei, H., Zhang, Q.	A new colorimetric sensor for visible detection of Cu(II) based on photoreductive ability of quantum dots	2018	Analytica Chimica Acta	1021	NA	NA	140	146	NA	NA	10.1016/j.aca.2018.03.011	https://www.scopus.com/inward/record.url?eid=2-s2.0-85044256863&partnerID=40&md5=2d114f498cf87c920fe336d6034da191	Article	NA	Scopus	Â© 2018 Elsevier B.V. Quantum dots (QDs) have been widely used to develop analytical methods due to their unique fluorescent and photoelectrochemical characteristics. However, analytical strategies based on their catalytic property are rarely reported. Here, we demonstrate that the photoreductive ability of QDs can be utilized to develop a sensitive and selective colorimetric sensor for Cu(II). B…	A new colorimetric sensor for visible detection of Cu(II) based on photoreductive ability of quantum dots <U+FFFD><U+FFFD> 2018 Elsevier B.V. Quantum dots (QDs) have been widely used to develop analytical methods due to their unique fluorescent and photoelectrochemical characteristics. However, analytical strategies based on their catalytic property are rarely reported. Here, we demonstrate that …	A new colorimetric sensor for visible detection of Cu(II) based on photoreductive ability of quantum dots <U+FFFD><U+FFFD> 2018 Elsevier B.V.	2-s2.0-85044256863	no		new identification method
2895	1825	CastrignanÃ², E., Mardal, M., Rydevik, A., Miserez, B., Ramsey, J., Shine, T., Panto, G.D., Meyer, M.R., Kasprzyk-Hordern, B.	A new approach towards biomarker selection in estimation of human exposure to chiral chemicals: A case study of mephedrone	2017	Scientific Reports	7	1	13009	NA	NA	NA	3	10.1038/s41598-017-12581-3	https://www.scopus.com/inward/record.url?eid=2-s2.0-85032838569&partnerID=40&md5=e9adf8a4ce7fca58cea1c4d0fdbb3083	Article	Open Access	Scopus	Â© 2017 The Author(s). Wastewater-based epidemiology is an innovative approach to estimate public health status using biomarker analysis in wastewater. A new compound detected in wastewater can be a potential biomarker of an emerging trend in public health. However, it is currently difficult to select new biomarkers mainly due to limited human metabolism data. This manuscript presents a new frame…	A new approach towards biomarker selection in estimation of human exposure to chiral chemicals: A case study of mephedrone <U+FFFD><U+FFFD> 2017 The Author(s). Wastewater-based epidemiology is an innovative approach to estimate public health status using biomarker analysis in wastewater. A new compound detected in wastewater can be a potential biomarker of an emerging trend in public health. Howe…	A new compound detected in wastewater can be a potential biomarker of an emerging trend in public health.	2-s2.0-85032838569	no		new bioindicator
1137	14048	Raboni, M., Torretta, V.	Validation of a new model for the sizing of denitrification reactors, by testing full-scale plants	2017	Environmental Technology (United Kingdom)	38	11	NA	1376	1382	NA	NA	10.1080/09593330.2016.1228700	https://www.scopus.com/inward/record.url?eid=2-s2.0-84987624601&partnerID=40&md5=4c77a0ea4d594111781086cf75609de8	Article	NA	Scopus	Â© 2016 Informa UK Limited, trading as Taylor & Francis Group. A new deterministic model for the calculation of the specific denitrification rate (SDNR), useful for the design of pre-denitrification reactors, was tested on eight full-scale activated sludge plants. The model represents the SDNR at 20Â°C (SDNR20Â°C) as a function of the sludge loading in the denitrification reactor (F:MDEN) and the…	Validation of a new model for the sizing of denitrification reactors, by testing full-scale plants <U+FFFD><U+FFFD> 2016 Informa UK Limited, trading as Taylor & Francis Group. A new deterministic model for the calculation of the specific denitrification rate (SDNR), useful for the design of pre-denitrification reactors, was tested on eight full-scale activated sludge plants. The model represents …	A new deterministic model for the calculation of the specific denitrification rate (SDNR), useful for the design of pre-denitrification reactors, was tested on eight full-scale activated sludge plants.	2-s2.0-84987624601	no		not about detections in aquatic environment
2947	2188	Okuneye, K.O., Velasco-Hernandez, J.X., Gumel, A.B.	THE \uNHOLY\\ CHIKUNGUNYA-DENGUE-ZIKA TRINITY: A THEORETICAL ANALYSIS\\\""	2017	Journal of Biological Systems	25	4	NA	545	585	NA	NA	10.1142/S0218339017400046	https://www.scopus.com/inward/record.url?eid=2-s2.0-85034083330&partnerID=40&md5=9fdfa273104638861f2c03f2b9008a28	Article	NA	Scopus	Â© 2017 World Scientific Publishing Company. Aedes aegypti is the vector for numerous diseases in humans and other (reservoir) hosts, such as chikungunya, dengue fever and Zika virus. A new deterministic model is designed and used to assess the dynamics of the three diseases in a population where Aedes mosquitoes are abundant. The model to be designed incorporates the recently-released imperfect …	THE \uNHOLY\\ CHIKUNGUNYA-DENGUE-ZIKA TRINITY: A THEORETICAL ANALYSIS\\\" <U+FFFD><U+FFFD> 2017 World Scientific Publishing Company. Aedes aegypti is the vector for numerous diseases in humans and other (reservoir) hosts, such as chikungunya, dengue fever and Zika virus. A new deterministic model is designed and used to assess the dynamics of the three diseases in a population where Aedes mosquit…	A new deterministic model is designed and used to assess the dynamics of the three diseases in a population where Aedes mosquitoes are abundant.	2-s2.0-85034083330	no		not about detections in aquatic environment
542	7785	UroviÄ‡, A., StojanoviÄ‡, Z., KraviÄ‡, S., Grahovac, N., BursiÄ‡, V., VukoviÄ‡, G., SuturoviÄ‡, Z.	Development and validation of chronopotentiometric method for imidacloprid determination in pesticide formulations and river water samples	2016	International Journal of Analytical Chemistry	2016	NA	5138491	NA	NA	NA	2	10.1155/2016/5138491	https://www.scopus.com/inward/record.url?eid=2-s2.0-84961904757&partnerID=40&md5=a082a07edff59077e2f021938683fd6e	Article	Open Access	Scopus	Â© 2016 Ana uroviÄ‡ et al. A new electrochemical method for determination of imidacloprid using chronopotentiometry on thin film mercury and glassy carbon electrode was presented. The most important experimental parameters of chronopotentiometry were examined and optimized with respect to imidacloprid analytical signal. Imidacloprid provided well-defined reduction peak in Britton-Robinson buffer …	Development and validation of chronopotentiometric method for imidacloprid determination in pesticide formulations and river water samples <U+FFFD><U+FFFD> 2016 Ana urovi<U+FFFD><U+FFFD> et al. A new electrochemical method for determination of imidacloprid using chronopotentiometry on thin film mercury and glassy carbon electrode was presented. The most important experimental parameters of chrono…	A new electrochemical method for determination of imidacloprid using chronopotentiometry on thin film mercury and glassy carbon electrode was presented.	2-s2.0-84961904757	no		new identification method
2219	14978	Yu, H.A., Lee, J., Lewis, S.W., Silvester, D.S.	Detection of 2,4,6-Trinitrotoluene Using a Miniaturized, Disposable Electrochemical Sensor with an Ionic Liquid Gel-Polymer Electrolyte Film	2017	Analytical Chemistry	89	8	NA	4729	4736	NA	3	10.1021/acs.analchem.7b00679	https://www.scopus.com/inward/record.url?eid=2-s2.0-85020015983&partnerID=40&md5=7d0d08bd6ced8decd788400b17337a96	Article	NA	Scopus	Â© 2017 American Chemical Society.A new electrochemical method to detect and quantify the explosive compound 2,4,6-trinitrotoluene (TNT) in aqueous solutions is demonstrated. A disposable thin-film electrode modified with a droplet of a gel-polymer electrolyte (GPE) was immersed directly into samples of TNT at concentrations of 1-10 Î¼g/mL. The GPE contained the hydrophobic room-temperature ionic…	Detection of 2,4,6-Trinitrotoluene Using a Miniaturized, Disposable Electrochemical Sensor with an Ionic Liquid Gel-Polymer Electrolyte Film <U+FFFD><U+FFFD> 2017 American Chemical Society.A new electrochemical method to detect and quantify the explosive compound 2,4,6-trinitrotoluene (TNT) in aqueous solutions is demonstrated. A disposable thin-film electrode modified with a droplet of a gel-pol…	A new electrochemical method to detect and quantify the explosive compound 2,4,6-trinitrotoluene (TNT) in aqueous solutions is demonstrated.	2-s2.0-85020015983	no		new identification method
1378	22520	Rao, S.K., Sravana, P., Rao, T.C.	Experimental studies in Ultrasonic Pulse Velocity of roller compacted concrete pavement containing fly ash and M-sand Studies in Ultrasonic Pulse Velocity of Roller compacted concrete pavement	2016	International Journal of Pavement Research and Technology	9	4	NA	289	301	NA	7	10.1016/j.ijprt.2016.08.003	https://www.scopus.com/inward/record.url?eid=2-s2.0-84995503419&partnerID=40&md5=870dd33c9c43a8aa3b310260a19e26db	Article	Open Access	Scopus	Â© 2016 Chinese Society of Pavement Engineering This paper presents the experimental investigation results of Ultrasonic Pulse Velocity (UPV) tests conducted on roller compacted concrete pavement (RCCP) material containing Class F fly ash of as mineral admixture. River sand, M-sand and combination of M-sand and River sand are used as fine aggregate in this experimental work. Three types of fly as…	Experimental studies in Ultrasonic Pulse Velocity of roller compacted concrete pavement containing fly ash and M-sand Studies in Ultrasonic Pulse Velocity of Roller compacted concrete pavement <U+FFFD><U+FFFD> 2016 Chinese Society of Pavement Engineering This paper presents the experimental investigation results of Ultrasonic Pulse Velocity (UPV) tests conducted on roller compacted concrete pavem…	A new empirical equation is proposed to determine the Dynamic Elastic Modulus of FRCCP.	2-s2.0-84995503419	no		new identification method
2371	3542	Bacher, C., Riebel, U., Marschall, S., Groll, A.	Visualization of submicron aerosol agglomeration by laser-induced fluorescence	2017	Aerosol Science and Technology	51	9	NA	1093	1098	NA	NA	10.1080/02786826.2017.1339863	https://www.scopus.com/inward/record.url?eid=2-s2.0-85021828498&partnerID=40&md5=4a8f76378048d0d3bd7aa0a666ef75c4	Article	NA	Scopus	Â© 2017 American Association for Aerosol Research.A new experimental technique is reported to visualize agglomeration of submicron aerosol particles by laser-induced fluorescence (LIF). The basic idea is to produce or activate the fluorescent tracer material by a chemical reaction triggered by the agglomeration between two chemically different primary particles. Different types of chemical reacti…	Visualization of submicron aerosol agglomeration by laser-induced fluorescence <U+FFFD><U+FFFD> 2017 American Association for Aerosol Research.A new experimental technique is reported to visualize agglomeration of submicron aerosol particles by laser-induced fluorescence (LIF). The basic idea is to produce or activate the fluorescent tracer material by a chemical reaction triggered by the agglome…	A new experimental technique is reported to visualize agglomeration of submicron aerosol particles by laser-induced fluorescence (LIF).	2-s2.0-85021828498	no		new identification method
135	7696	LeÅ›niewska, B., Kisielewska, K., Wiater, J., Godlewska-Å»yÅ‚kiewicz, B.	Fast and simple procedure for fractionation of zinc in soil using an ultrasound probe and FAAS detection. Validation of the analytical method and evaluation of the uncertainty budget	2016	Environmental Monitoring and Assessment	188	1	29	1	13	NA	5	10.1007/s10661-015-5020-6	https://www.scopus.com/inward/record.url?eid=2-s2.0-84949768188&partnerID=40&md5=84952a956af5c72bc608fe6e1fedaac7	Article	NA	Scopus	Â© 2015, The Author(s). A new fast method for determination of mobile zinc fractions in soil is proposed in this work. The three-stage modified BCR procedure used for fractionation of zinc in soil was accelerated by using ultrasounds. The working parameters of an ultrasound probe, a power and a time of sonication, were optimized in order to acquire the content of analyte in soil extracts obtained…	Fast and simple procedure for fractionation of zinc in soil using an ultrasound probe and FAAS detection. Validation of the analytical method and evaluation of the uncertainty budget <U+FFFD><U+FFFD> 2015, The Author(s). A new fast method for determination of mobile zinc fractions in soil is proposed in this work. The three-stage modified BCR procedure used for fractionation of zinc in soil was a…	A new fast method for determination of mobile zinc fractions in soil is proposed in this work.	2-s2.0-84949768188	no		new identification method
3074	2132	Kushniruk, I., Schirmer, T., Bensby, T.	Kinematic structures of the solar neighbourhood revealed by Gaia DR1/TGAS and RAVE	2017	Astronomy and Astrophysics	608	NA	A73	NA	NA	NA	1	10.1051/0004-6361/201731147	https://www.scopus.com/inward/record.url?eid=2-s2.0-85038213694&partnerID=40&md5=e5e445ce8e5592ad3a22ad6aa377e39b	Article	NA	Scopus	Â© ESO 2017.Context. The velocity distribution of stars in the solar neighbourhood is inhomogeneous and rich with stellar streams and kinematic structures. These may retain important clues regarding the formation and dynamical history of the Milky Way. However, the nature and origin of many of the streams and structures is unclear, hindering our understanding of how the Milky Way formed and evolv…	Kinematic structures of the solar neighbourhood revealed by Gaia DR1/TGAS and RAVE <U+FFFD><U+FFFD> ESO 2017.Context. The velocity distribution of stars in the solar neighbourhood is inhomogeneous and rich with stellar streams and kinematic structures. These may retain important clues regarding the formation and dynamical history of the Milky Way. However, the nature and origin of many of the str…	A new feature is discovered and three recently detected groups are confirmed at high confidence level.	2-s2.0-85038213694	no		new identification method
785	4946	Dupont, B., Datry, A., PoirÃ©e, S., Canestri, A., Boucheneb, S., Fourniols, E.	Role of a NSAID in the apparent cure of a fungal mycetoma	2016	Journal de Mycologie Medicale	26	2	NA	86	93	NA	4	10.1016/j.mycmed.2016.03.003	https://www.scopus.com/inward/record.url?eid=2-s2.0-84971657416&partnerID=40&md5=3fcc8139169dac3c3dca5079dc389a70	Article	NA	Scopus	Â© 2016 Elsevier Masson SAS.We report the case of a fungal mycetoma due to Madurella mycetomatis that failed to respond to surgery and antifungal treatment but responded strongly to the addition of a non-steroidal anti-inflammatory drug (NSAID). This African patient was born in Mauritania in 1972. He was a herdsman, living close to the Senegal River. The first nodules appeared on the left foot at…	Role of a NSAID in the apparent cure of a fungal mycetoma <U+FFFD><U+FFFD> 2016 Elsevier Masson SAS.We report the case of a fungal mycetoma due to Madurella mycetomatis that failed to respond to surgery and antifungal treatment but responded strongly to the addition of a non-steroidal anti-inflammatory drug (NSAID). This African patient was born in Mauritania in 1972. He was a herdsman, living cl…	A new flare-up occurred in February, 2006.	2-s2.0-84971657416	no		not about detections in aquatic environment
455	4631	Thomas, I.A., Jordan, P., Mellander, P.-E., Fenton, O., Shine, O., Ã“ hUallachÃ¡in, D., Creamer, R., McDonald, N.T., Dunlop, P., Murphy, P.N.C.	Improving the identification of hydrologically sensitive areas using LiDAR DEMs for the delineation and mitigation of critical source areas of diffuse pollution	2016	Science of the Total Environment	556	NA	NA	276	290	NA	15	10.1016/j.scitotenv.2016.02.183	https://www.scopus.com/inward/record.url?eid=2-s2.0-84960342394&partnerID=40&md5=2367c74303676567f68e1cd5e28c0a8f	Article	Open Access	Scopus	Â© 2016 The Authors. Identifying critical source areas (CSAs) of diffuse pollution in agricultural catchments requires the accurate identification of hydrologically sensitive areas (HSAs) at highest propensity for generating surface runoff and transporting pollutants. A new GIS-based HSA Index is presented that improves the identification of HSAs at the sub-field scale by accounting for microtopo…	Improving the identification of hydrologically sensitive areas using LiDAR DEMs for the delineation and mitigation of critical source areas of diffuse pollution <U+FFFD><U+FFFD> 2016 The Authors. Identifying critical source areas (CSAs) of diffuse pollution in agricultural catchments requires the accurate identification of hydrologically sensitive areas (HSAs) at highest propensity for generating…	A new GIS-based HSA Index is presented that improves the identification of HSAs at the sub-field scale by accounting for microtopographic controls.	2-s2.0-84960342394	no		not about detections in aquatic environment
825	19539	GaloviÄ‡, O., SamardÅ¾iÄ‡, M., HajdukoviÄ‡, M., Sak-Bosnar, M.	A new graphene-based surfactant sensor for the determination of anionic surfactants in real samples	2016	Sensors and Actuators, B: Chemical	236	NA	NA	257	267	NA	6	10.1016/j.snb.2016.05.166	https://www.scopus.com/inward/record.url?eid=2-s2.0-84974674473&partnerID=40&md5=4d2d786a7a3286ac30a0c67bd511f932	Article	NA	Scopus	Â© 2016 Elsevier B.V. A new high-sensitivity potentiometric all-solid-state sensor for the determination of anionic surfactants is constructed based on the dimethyldioctadecylammonium-tetraphenylborate (DDA-TPB) ion pair as a sensing material and graphene. Graphene nanoparticles are used for immobilization of the sensing material in the membrane, preventing the leaching of electroactive material …	A new graphene-based surfactant sensor for the determination of anionic surfactants in real samples <U+FFFD><U+FFFD> 2016 Elsevier B.V. A new high-sensitivity potentiometric all-solid-state sensor for the determination of anionic surfactants is constructed based on the dimethyldioctadecylammonium-tetraphenylborate (DDA-TPB) ion pair as a sensing material and graphene. Graphene nanoparticles are u…	A new graphene-based surfactant sensor for the determination of anionic surfactants in real samples <U+FFFD><U+FFFD> 2016 Elsevier B.V.	2-s2.0-84974674473	no		new identification method
2036	17223	Shah, K., Ain, N.U., Ahmed, F., Anis, I., Shah, M.R.	A new highly selective chemosensor for the detection of iron ion in aqueous medium based on click generated triazole	2017	Sensors and Actuators, B: Chemical	249	NA	NA	515	522	NA	5	10.1016/j.snb.2017.04.120	https://www.scopus.com/inward/record.url?eid=2-s2.0-85018302737&partnerID=40&md5=6020dfadbfa7055189aec8360d7f76c4	Article	NA	Scopus	Â© 2017 Elsevier B.V. A new click generated triazole based chemosensor 5 was designed and synthesized, that exhibits excellent selectivity for Fe+3 ion over a wide range of tested metal ions e.g. NH4 +, Li+, Na+, K+, Cu+, Ag+, Ca+2, Ni+2, Co+2, Cd+2, Mg+2, Cu+2, Zn+2, Pb+2, Hg+2, In+3, La+3and Y+3 in an aqueous medium without any remarkable interference. With Fe+3, the sensor 5 showed enhancement…	A new highly selective chemosensor for the detection of iron ion in aqueous medium based on click generated triazole <U+FFFD><U+FFFD> 2017 Elsevier B.V. A new click generated triazole based chemosensor 5 was designed and synthesized, that exhibits excellent selectivity for Fe+3 ion over a wide range of tested metal ions e.g. NH4 +, Li+, Na+, K+, Cu+, Ag+, Ca+2, Ni+2, Co+2, Cd+2, Mg+2, Cu+2, Zn+2,…	A new highly selective chemosensor for the detection of iron ion in aqueous medium based on click generated triazole <U+FFFD><U+FFFD> 2017 Elsevier B.V.	2-s2.0-85018302737	no		new identification method
826	19539	GaloviÄ‡, O., SamardÅ¾iÄ‡, M., HajdukoviÄ‡, M., Sak-Bosnar, M.	A new graphene-based surfactant sensor for the determination of anionic surfactants in real samples	2016	Sensors and Actuators, B: Chemical	236	NA	NA	257	267	NA	6	10.1016/j.snb.2016.05.166	https://www.scopus.com/inward/record.url?eid=2-s2.0-84974674473&partnerID=40&md5=4d2d786a7a3286ac30a0c67bd511f932	Article	NA	Scopus	Â© 2016 Elsevier B.V. A new high-sensitivity potentiometric all-solid-state sensor for the determination of anionic surfactants is constructed based on the dimethyldioctadecylammonium-tetraphenylborate (DDA-TPB) ion pair as a sensing material and graphene. Graphene nanoparticles are used for immobilization of the sensing material in the membrane, preventing the leaching of electroactive material …	A new graphene-based surfactant sensor for the determination of anionic surfactants in real samples <U+FFFD><U+FFFD> 2016 Elsevier B.V. A new high-sensitivity potentiometric all-solid-state sensor for the determination of anionic surfactants is constructed based on the dimethyldioctadecylammonium-tetraphenylborate (DDA-TPB) ion pair as a sensing material and graphene. Graphene nanoparticles are u…	A new high-sensitivity potentiometric all-solid-state sensor for the determination of anionic surfactants is constructed based on the dimethyldioctadecylammonium-tetraphenylborate (DDA-TPB) ion pair as a sensing material and graphene.	2-s2.0-84974674473	no		new identification method
2321	12625	Wang, X., Tan, W., Wang, C.	A new index for identifying different types of El NiÃ±o Modoki events	2018	Climate Dynamics	50	43319	NA	2753	2765	NA	1	10.1007/s00382-017-3769-8	https://www.scopus.com/inward/record.url?eid=2-s2.0-85021244770&partnerID=40&md5=b07a1dfc84f2611e0a4027801ce08eb5	Article	NA	Scopus	Â© 2017, Springer-Verlag GmbH Germany. El NiÃ±o Modoki events can be further classified into El NiÃ±o Modoki I and II in terms of their opposite impacts on southern China rainfall (Wang and Wang, J Clim 26:1322â€“1338, 2013) and the Indian Ocean dipole mode (Wang and Wang, Clim Dyn 42:991â€“1005, 2014). The present paper develops an index to identify the types of El NiÃ±o events. The El NiÃ±o Mod…	A new index for identifying different types of El Ni<U+FFFD><U+FFFD>o Modoki events <U+FFFD><U+FFFD> 2017, Springer-Verlag GmbH Germany. El Ni<U+FFFD><U+FFFD>o Modoki events can be further classified into El Ni<U+FFFD><U+FFFD>o Modoki I and II in terms of their opposite impacts on southern China rainfall (Wang and Wang, J Clim 26:1322<U+FFFD><U+FFFD><U+FFFD>1338, 2013) and the Indian Ocean dipole…	A new index for identifying different types of El Ni<U+FFFD><U+FFFD>o Modoki events <U+FFFD><U+FFFD> 2017, Springer-Verlag GmbH Germany.	2-s2.0-85021244770	no		new identification method
1581	21388	Meeravali, N.N., Madhavi, K., Kumar, S.J.	A new ion pair-based surfactant-assisted dispersive liquid-liquid microextraction of ultratrace levels of beryllium from natural and effluent samples followed by ETAAS determination	2016	Atomic Spectroscopy	37	5	NA	202	209	NA	1	NA	https://www.scopus.com/inward/record.url?eid=2-s2.0-85008239750&partnerID=40&md5=a5165e170351ea21d8bc0cc514276df6	Article	NA	Scopus	A new ion pair-based surfactant-assisted dispersive liquid-liquid microextraction (IP-SA-DLLME) procedure was developed for the separation and pre-concentration of ultratrace levels of beryllium from effluents and natural water samples. A cetylpyridinium ammonium bromide (CPAB) cationic surfactant was used as both ion pairing and dispersing solvent. The method is based on the formation of extract…	A new ion pair-based surfactant-assisted dispersive liquid-liquid microextraction of ultratrace levels of beryllium from natural and effluent samples followed by ETAAS determination A new ion pair-based surfactant-assisted dispersive liquid-liquid microextraction (IP-SA-DLLME) procedure was developed for the separation and pre-concentration of ultratrace levels of beryllium from effluents and nat…	A new ion pair-based surfactant-assisted dispersive liquid-liquid microextraction of ultratrace levels of beryllium from natural and effluent samples followed by ETAAS determination A new ion pair-based surfactant-assisted dispersive liquid-liquid microextraction (IP-SA-DLLME) procedure was developed for the separation and pre-concentration of ultratrace levels of beryllium from effluents and nat…	2-s2.0-85008239750	no		new identification method
2203	16857	EscolÃ Casas, M., Nielsen, T.K., Kot, W., Hansen, L.H., Johansen, A., Bester, K.	Degradation of mecoprop in polluted landfill leachate and waste water in a moving bed biofilm reactor	2017	Water Research	121	NA	NA	213	220	NA	2	10.1016/j.watres.2017.05.031	https://www.scopus.com/inward/record.url?eid=2-s2.0-85019898567&partnerID=40&md5=328c5aaa1621128042c6a2c9fa10eeef	Article	NA	Scopus	Â© 2017 Mecoprop is a common pollutant in effluent-, storm- and groundwater as well as in leachates from derelict dumpsites. Thus, bioremediation approaches may be considered. We conducted batch experiments with moving bed biofilm (MBBR)-carriers to understand the degradation of mecoprop. As a model, the carriers were incubated in effluent from a conventional wastewater treatment plant which was …	Degradation of mecoprop in polluted landfill leachate and waste water in a moving bed biofilm reactor <U+FFFD><U+FFFD> 2017 Mecoprop is a common pollutant in effluent-, storm- and groundwater as well as in leachates from derelict dumpsites. Thus, bioremediation approaches may be considered. We conducted batch experiments with moving bed biofilm (MBBR)-carriers to understand the degradation of mec…	A new metabolite (4-chloro-2-methylphenol sulfate) was identified and quantified.	2-s2.0-85019898567	Yes	CH	new metabolite of mecoprop
2570	2614	Szulc, J., Ruman, T., Gutarowska, B.	Metabolome profiles of moulds on carton-gypsum board and malt extract agar medium obtained using an AuNPET SALDI-ToF-MS method	2017	International Biodeterioration and Biodegradation	125	NA	NA	13	23	NA	3	10.1016/j.ibiod.2017.08.002	https://www.scopus.com/inward/record.url?eid=2-s2.0-85027844283&partnerID=40&md5=88b07e64ab79a49b445096cada349394	Article	NA	Scopus	Â© 2017 Elsevier Ltd The aim of this study was to compare the metabolite profile of the moulds Alternaria, Aspergillus, Cladosporium, Penicillium, Stachybotrys, and Trichoderma under model conditions on MEA (malt extract agar) medium and carton-gypsum board (CGB). This was followed by comparison of the metabolite profile of each particular strain and of a mixed culture of all moulds together. Met…	Metabolome profiles of moulds on carton-gypsum board and malt extract agar medium obtained using an AuNPET SALDI-ToF-MS method <U+FFFD><U+FFFD> 2017 Elsevier Ltd The aim of this study was to compare the metabolite profile of the moulds Alternaria, Aspergillus, Cladosporium, Penicillium, Stachybotrys, and Trichoderma under model conditions on MEA (malt extract agar) medium and carton-gypsum board …	A new metabolomic methodology allowed the identification of 89 metabolites belonging to 48 metabolomic pathways.	2-s2.0-85027844283	no		new identification method
3959	1382	Yang, F., Zhu, N., Liu, G., Ma, H., Wei, X., Hu, C., Wang, Z., Huang, J.	A new method for determining the connection resistance of the compression connector in cable joint	2018	Energies	11	7	1667	NA	NA	NA	NA	10.3390/en11071667	https://www.scopus.com/inward/record.url?eid=2-s2.0-85051196886&partnerID=40&md5=65e10954888091bad38a5e3ab5449f0b	Article	Open Access	Scopus	Â© 2018 by the authors. Licensee MDPI, Basel, Switzerland. The compression connector of a cable joint is one of the major components causing joint overheating. This paper proposed a new model to determine the connection resistance of the compression connector. It innovatively integrated electrical contacts model analysis (ECMA) with finite element analysis (FEA) in the modeling. The compacted str…	A new method for determining the connection resistance of the compression connector in cable joint <U+FFFD><U+FFFD> 2018 by the authors. Licensee MDPI, Basel, Switzerland. The compression connector of a cable joint is one of the major components causing joint overheating. This paper proposed a new model to determine the connection resistance of the compression connector. It innovatively integrate…	A new method for determining the connection resistance of the compression connector in cable joint <U+FFFD><U+FFFD> 2018 by the authors.	2-s2.0-85051196886	no		not about detections in aquatic environment
2571	17126	Prchal, V., Vyskocil, V., Barek, J.	Determination of 2,4,6-trinitrophenol by differential pulse voltammetry at a bismuth bulk working electrode	2017	Journal of the Electrochemical Society	164	6	NA	H316	H320	NA	1	10.1149/2.0861706jes	https://www.scopus.com/inward/record.url?eid=2-s2.0-85027854897&partnerID=40&md5=63f074a29c8aefc3a58628440867f411	Article	NA	Scopus	Â© 2017 The Electrochemical Society. All rights reserved.A new method for differential pulse voltammetric determination of the priority pollutant 2,4,6-trinitrophenol (picric acid) on a bismuth bulk electrode using evaluation of the signal based on polynomial baseline fitting and subtraction is reported. Linear calibration curves were obtained in an acetate buffer (pH 4.0) solution from 2 Ã— 10âˆ…	Determination of 2,4,6-trinitrophenol by differential pulse voltammetry at a bismuth bulk working electrode <U+FFFD><U+FFFD> 2017 The Electrochemical Society. All rights reserved.A new method for differential pulse voltammetric determination of the priority pollutant 2,4,6-trinitrophenol (picric acid) on a bismuth bulk electrode using evaluation of the signal based on polynomial baseline fitting …	A new method for differential pulse voltammetric determination of the priority pollutant 2,4,6-trinitrophenol (picric acid) on a bismuth bulk electrode using evaluation of the signal based on polynomial baseline fitting and subtraction is reported.	2-s2.0-85027854897	no		not about detections in aquatic environment
1247	21449	Qiu, J., Wang, Y., Zhou, X., Kang, X.	Determination of phthalate esters in fat-containing foods by packed nanofiber solid-phase extraction column and gas chromatography	2016	Journal of Southeast University (English Edition)	32	3	NA	322	326	NA	NA	10.3969/j.issn.1003-7985.2016.03.011	https://www.scopus.com/inward/record.url?eid=2-s2.0-84991271824&partnerID=40&md5=61bf01827ce44d75c50244a198a2d0c7	Article	NA	Scopus	Â© 2016, Editorial Department of Journal of Southeast University. All right reserved. A new method for simultaneous determination of four phthalate esters (PAEs) in commercial fat-containing foods was developed by the combination of a packed nanofibers column based on solid-phase extraction with gas chromatography-flame ionization detector (GC-FID). Conditions for obtaining optimum extraction eff…	Determination of phthalate esters in fat-containing foods by packed nanofiber solid-phase extraction column and gas chromatography <U+FFFD><U+FFFD> 2016, Editorial Department of Journal of Southeast University. All right reserved. A new method for simultaneous determination of four phthalate esters (PAEs) in commercial fat-containing foods was developed by the combination of a packed nanofibers c…	A new method for simultaneous determination of four phthalate esters (PAEs) in commercial fat-containing foods was developed by the combination of a packed nanofibers column based on solid-phase extraction with gas chromatography-flame ionization detector (GC-FID).	2-s2.0-84991271824	no		new identification method
2720	2784	Maxwell, S.L., Culligan, B., Hutchison, J.B., Sudowe, R., McAlister, D.R.	Rapid method to determine<sup>226</sup>Ra in steel samples	2017	Journal of Radioanalytical and Nuclear Chemistry	314	2	NA	1417	1423	NA	NA	10.1007/s10967-017-5491-8	https://www.scopus.com/inward/record.url?eid=2-s2.0-85029737136&partnerID=40&md5=8a9eccdfe4a2ab9d6b39b76fac54801e	Article	NA	Scopus	Â© 2017, AkadÃ©miai KiadÃ³, Budapest, Hungary.The rapid measurement of 226Ra in steel samples is very important in the event of a radiological emergency. 226Ra (T1/2 = 1600 y) is a natural radionuclide present in the environment and a highly toxic alpha-emitter. Due to its long life and tendency to concentrate in bones, 226Ra ingestion or inhalation can lead to significant committed dose to indiv…	Rapid method to determine<sup>226</sup>Ra in steel samples <U+FFFD><U+FFFD> 2017, Akad<U+FFFD><U+FFFD>miai Kiad<U+FFFD><U+FFFD>, Budapest, Hungary.The rapid measurement of 226Ra in steel samples is very important in the event of a radiological emergency. 226Ra (T1/2 = 1600 y) is a natural radionuclide present in the environment and a highly toxic alpha-emitter. Due to its long life and tendency t…	A new method for the determination of 226Ra in steel samples has been developed at the Savannah River Environmental Laboratory.	2-s2.0-85029737136	no		not about detections in aquatic environment
3020	2095	Akkaya, E., Aylin Kasa, N., Ã‡etin, G., Bakirdere, S.	A new method for the determination of cadmium at ultratrace levels using slotted quartz tube-flame atomic absorption spectrometry after preconcentration with stearic acid coated magnetite nanoparticles	2017	Journal of Analytical Atomic Spectrometry	32	12	NA	2433	2438	NA	3	10.1039/c7ja00303j	https://www.scopus.com/inward/record.url?eid=2-s2.0-85036477093&partnerID=40&md5=8397bf499071a93f328488aee9821285	Article	NA	Scopus	Â© 2017 The Royal Society of Chemistry.A combination of slotted quartz tube attached flame atomic absorption spectrometry (SQT-FAAS) and stearic acid coated magnetite nanoparticle based solid phase microextraction (SPME-MNP) was used for the determination of ultratrace amounts of cadmium. Coated magnetite nanoparticles were used for the extraction of cadmium from aqueous samples by providing a la…	A new method for the determination of cadmium at ultratrace levels using slotted quartz tube-flame atomic absorption spectrometry after preconcentration with stearic acid coated magnetite nanoparticles <U+FFFD><U+FFFD> 2017 The Royal Society of Chemistry.A combination of slotted quartz tube attached flame atomic absorption spectrometry (SQT-FAAS) and stearic acid coated magnetite nanoparticle bas…	A new method for the determination of cadmium at ultratrace levels using slotted quartz tube-flame atomic absorption spectrometry after preconcentration with stearic acid coated magnetite nanoparticles <U+FFFD><U+FFFD> 2017 The Royal Society of Chemistry.	2-s2.0-85036477093	no		new identification method
675	21854	Yang, C., Wang, L., Zhu, Z., Jin, L., Zheng, H., Belshaw, N.S., Hu, S.	Evaluation of flow injection-solution cathode glow discharge-atomic emission spectrometry for the determination of major elements in brines	2016	Talanta	155	NA	NA	314	320	NA	18	10.1016/j.talanta.2016.04.060	https://www.scopus.com/inward/record.url?eid=2-s2.0-84965155680&partnerID=40&md5=2239de089910a27290ba1398c4335bec	Article	NA	Scopus	Â© 2016 Elsevier B.V. All rights reserved.A new method for the determination of major metal elements in high salinity brines was developed by solution cathode glow discharge (SCGD) with flow injection analysis (FIA). The matrix interferences of major cations and anions in brines have been evaluated. It was found that high concentration of Na+ and K+ could interfere each other, K+ at a concentrati…	Evaluation of flow injection-solution cathode glow discharge-atomic emission spectrometry for the determination of major elements in brines <U+FFFD><U+FFFD> 2016 Elsevier B.V. All rights reserved.A new method for the determination of major metal elements in high salinity brines was developed by solution cathode glow discharge (SCGD) with flow injection analysis (FIA). The matrix interferences of …	A new method for the determination of major metal elements in high salinity brines was developed by solution cathode glow discharge (SCGD) with flow injection analysis (FIA).	2-s2.0-84965155680	no		new identification method
2539	3332	Maxwell, S.L., Culligan, B., Hutchison, J.B., Utsey, R.C., Sudowe, R., McAlister, D.R.	Rapid method to determine<sup>89/90</sup>Sr in steel samples	2017	Journal of Radioanalytical and Nuclear Chemistry	314	1	NA	439	450	NA	3	10.1007/s10967-017-5402-z	https://www.scopus.com/inward/record.url?eid=2-s2.0-85027326790&partnerID=40&md5=d53837a4845316e76b546ad528858011	Article	NA	Scopus	Â© 2017, AkadÃ©miai KiadÃ³, Budapest, Hungary. The rapid measurement of 89/90Sr in steel samples is important in the event of a radiological emergency as well as for the characterization of routine nuclear decommissioning samples. A new method for the determination of radiostrontium in 1â€“2 g steel samples has been developed at the Savannah River Environmental Laboratory. The new method employs …	Rapid method to determine<sup>89/90</sup>Sr in steel samples <U+FFFD><U+FFFD> 2017, Akad<U+FFFD><U+FFFD>miai Kiad<U+FFFD><U+FFFD>, Budapest, Hungary. The rapid measurement of 89/90Sr in steel samples is important in the event of a radiological emergency as well as for the characterization of routine nuclear decommissioning samples. A new method for the determination of radiostrontium in 1<U+FFFD>…	A new method for the determination of radiostrontium in 1<U+FFFD><U+FFFD><U+FFFD>2 g steel samples has been developed at the Savannah River Environmental Laboratory.	2-s2.0-85027326790	no		new identification method
811	21657	Ezoddin, M., Abdi, K.	Monitoring of antifungal drugs in biological samples using ultrasonic-assisted supramolecular dispersive liquid-liquid microextraction based on solidification of a floating organic droplet	2016	Journal of Chromatography B: Analytical Technologies in the Biomedical and Life Sciences	1027	NA	NA	74	80	NA	4	10.1016/j.jchromb.2016.05.025	https://www.scopus.com/inward/record.url?eid=2-s2.0-84973572855&partnerID=40&md5=07e27ede679c590db4ece30bdf134547	Article	NA	Scopus	Â© 2016 Elsevier B.V. A new method for the simultaneous determination of the three antifungal drugs using ultrasonic-assisted supramolecular dispersive liquid-liquid microextraction based on solidification of a floating organic droplet (UASMDLLME-SFO) was proposed. The supramolecular solvents produced from reversed micelles of 1-dodecanol (extraction solvent) in tetrahydrofuran (THF) were injecte…	Monitoring of antifungal drugs in biological samples using ultrasonic-assisted supramolecular dispersive liquid-liquid microextraction based on solidification of a floating organic droplet <U+FFFD><U+FFFD> 2016 Elsevier B.V. A new method for the simultaneous determination of the three antifungal drugs using ultrasonic-assisted supramolecular dispersive liquid-liquid microextraction based on solid…	A new method for the simultaneous determination of the three antifungal drugs using ultrasonic-assisted supramolecular dispersive liquid-liquid microextraction based on solidification of a floating organic droplet (UASMDLLME-SFO) was proposed.	2-s2.0-84973572855	no		new identification method
1620	16606	Yao, T., Yao, S.	Magnetic ionic liquid aqueous two-phase system coupled with high performance liquid chromatography: A rapid approach for determination of chloramphenicol in water environment	2017	Journal of Chromatography A	1481	NA	NA	12	22	NA	7	10.1016/j.chroma.2016.12.039	https://www.scopus.com/inward/record.url?eid=2-s2.0-85009851694&partnerID=40&md5=f808d6f4ec4fbd259cd695d053b2311d	Article	NA	Scopus	Â© 2016 Elsevier B.V.A novel organic magnetic ionic liquid based on guanidinium cation was synthesized and characterized. A new method of magnetic ionic liquid aqueous two-phase system (MILATPs) coupled with high-performance liquid chromatography (HPLC) was established to preconcentrate and determine trace amount of chloramphenicol (CAP) in water environment for the first time. In the absence of …	Magnetic ionic liquid aqueous two-phase system coupled with high performance liquid chromatography: A rapid approach for determination of chloramphenicol in water environment <U+FFFD><U+FFFD> 2016 Elsevier B.V.A novel organic magnetic ionic liquid based on guanidinium cation was synthesized and characterized. A new method of magnetic ionic liquid aqueous two-phase system (MILATPs) coupled with hi…	A new method of magnetic ionic liquid aqueous two-phase system (MILATPs) coupled with high-performance liquid chromatography (HPLC) was established to preconcentrate and determine trace amount of chloramphenicol (CAP) in water environment for the first time.	2-s2.0-85009851694	Yes	CH	chloramphenicol (CAP) in water environment for the first time
2242	18534	Sanemasa, M., Saiki, K., Kaneko, K., Ohba, T., Kusakabe, M., Ntchantcho, R., Fouepe, A., Tanyileke, G., Hell, J.V.	A new method to determine dissolved CO<inf>2</inf>concentration of lakes Nyos and Monoun using the sound speed and electrical conductivity of lake water	2017	Geological Society Special Publication	437	1	NA	193	203	NA	NA	10.1144/SP437.5	https://www.scopus.com/inward/record.url?eid=2-s2.0-85020232526&partnerID=40&md5=39bc25c3dcd7af5850151c81c89c3e39	Article	NA	Scopus	Â© 2017 The Author(s).A new method to measure the CO2 concentration in lakes Nyos and Monoun using sound speed (SS) and electrical conductivity (EC) of the lake water was developed. Limnic eruptions at lakes Monoun and Nyos in Cameroon, characterized by a risk related to possible sudden release of magmatic CO2 gas dissolved in the lake water, occurred in 1984 and 1986 respectively, killing about …	A new method to determine dissolved CO<inf>2</inf>concentration of lakes Nyos and Monoun using the sound speed and electrical conductivity of lake water <U+FFFD><U+FFFD> 2017 The Author(s).A new method to measure the CO2 concentration in lakes Nyos and Monoun using sound speed (SS) and electrical conductivity (EC) of the lake water was developed. Limnic eruptions at lakes Monoun and Nyos in Camer…	A new method to determine dissolved CO<inf>2</inf>concentration of lakes Nyos and Monoun using the sound speed and electrical conductivity of lake water <U+FFFD><U+FFFD> 2017 The Author(s).	2-s2.0-85020232526	no		not about detections in aquatic environment
2608	2970	GuÃ©rin, N., Riopel, R., Kramer-Tremblay, S., de Silva, N., Cornett, J., Dai, X.	Determination of<sup>99</sup>Tc in fresh water using TRU resin by ICP-MS	2017	Analytica Chimica Acta	988	NA	NA	114	120	NA	1	10.1016/j.aca.2017.08.013	https://www.scopus.com/inward/record.url?eid=2-s2.0-85028303237&partnerID=40&md5=f4bcdf3562876d6e67068c566479c9d5	Article	NA	Scopus	Â© 2017 Technetium-99 (99Tc) determination at trace level by inductively coupled plasma mass spectrometry (ICP-MS) is challenging because there is no readily available appropriate Tc isotopic tracer. A new method using Re as a recovery tracer to determine 99Tc in fresh water samples, which does not require any evaporation step, was developed. Tc(VII) and Re(VII) were pre-concentrated on a small a…	Determination of<sup>99</sup>Tc in fresh water using TRU resin by ICP-MS <U+FFFD><U+FFFD> 2017 Technetium-99 (99Tc) determination at trace level by inductively coupled plasma mass spectrometry (ICP-MS) is challenging because there is no readily available appropriate Tc isotopic tracer. A new method using Re as a recovery tracer to determine 99Tc in fresh water samples, which does not require any …	A new method using Re as a recovery tracer to determine 99Tc in fresh water samples, which does not require any evaporation step, was developed.	2-s2.0-85028303237	no		new identification method
665	6772	Lu, J., Wu, Z.-P., Che, W.-J., Xian, Y.-P., Guo, X.-D., Lv, J.-X., Li, H.	Determination of earthy-musty odorous compounds in drinking water by vortex assisted dispersive liquid-liquid microextraction combined with gas chromatography tandem mass spectrometry	2016	Analytical Sciences	32	4	NA	407	411	NA	3	10.2116/analsci.32.407	https://www.scopus.com/inward/record.url?eid=2-s2.0-84964988469&partnerID=40&md5=2f751bfe8abce9e83a2eca81248444a1	Article	NA	Scopus	Â© The Japan Society for Analytical Chemistry.A new method was developed for the determination of eight earthy-musty compounds in drinking water by gas chromatography tandem mass spectrometry (GC-MS/MS) combined with dispersive liquid-liquid microextraction (DLLME). In this work, the type and volume of extraction solvent and dispersion agent, and the amount of NaCl were optimized; the linearity, …	Determination of earthy-musty odorous compounds in drinking water by vortex assisted dispersive liquid-liquid microextraction combined with gas chromatography tandem mass spectrometry <U+FFFD><U+FFFD> The Japan Society for Analytical Chemistry.A new method was developed for the determination of eight earthy-musty compounds in drinking water by gas chromatography tandem mass spectrometry (GC-MS/MS…	A new method was developed for the determination of eight earthy-musty compounds in drinking water by gas chromatography tandem mass spectrometry (GC-MS/MS) combined with dispersive liquid-liquid microextraction (DLLME).	2-s2.0-84964988469	no		new identification method
777	6650	Bahadoran, M., Noorden, A.F.A., Mohajer, F.S., Abd Mubin, M.H., Chaudhary, K., Jalil, M.A., Ali, J., Yupapin, P.	Detection of Salmonella bacterium in drinking water using microring resonator	2016	Artificial Cells, Nanomedicine and Biotechnology	44	1	NA	315	321	NA	2	10.3109/21691401.2014.948549	https://www.scopus.com/inward/record.url?eid=2-s2.0-84971632124&partnerID=40&md5=10f5574a639c4979834ee7008d360449	Article	NA	Scopus	Â© Copyright 2014 Informa Healthcare USA, Inc.A new microring resonator system is proposed for the detection of the Salmonella bacterium in drinking water, which is made up of SiO2-TiO2 waveguide embedded inside thin film layer of the flagellin. The change in refractive index due to the binding of the Salmonella bacterium with flagellin layer causes a shift in the output signal wavelength and the…	Detection of Salmonella bacterium in drinking water using microring resonator <U+FFFD><U+FFFD> Copyright 2014 Informa Healthcare USA, Inc.A new microring resonator system is proposed for the detection of the Salmonella bacterium in drinking water, which is made up of SiO2-TiO2 waveguide embedded inside thin film layer of the flagellin. The change in refractive index due to the binding of the Salm…	A new microring resonator system is proposed for the detection of the Salmonella bacterium in drinking water, which is made up of SiO2-TiO2 waveguide embedded inside thin film layer of the flagellin.	2-s2.0-84971632124	no		new identification method
2685	9988	Pesquero, M.D., Bell, L.S., FernÃ¡ndez-Jalvo, Y.	Skeletal modification by microorganisms and their environments	2018	Historical Biology	30	6	NA	882	893	NA	NA	10.1080/08912963.2017.1371713	https://www.scopus.com/inward/record.url?eid=2-s2.0-85029427198&partnerID=40&md5=5ab9ab2cc9b03e9be4a3b4490fe532df	Article	NA	Scopus	Â© 2017, Â© 2017 Informa UK Limited, trading as Taylor & Francis Group.Microstructural post mortem changes to skeletal tissues by microorganisms are driven by several factors including the death history of an animal, its decomposition trajectory, and the depositing environment itself. The study we describe here brings together material from recent and fossil contexts that are depositionally disti…	Skeletal modification by microorganisms and their environments <U+FFFD><U+FFFD> 2017, <U+FFFD><U+FFFD> 2017 Informa UK Limited, trading as Taylor & Francis Group.Microstructural post mortem changes to skeletal tissues by microorganisms are driven by several factors including the death history of an animal, its decomposition trajectory, and the depositing environment itself. The study we describe …	A new microstructural change identified in material from terrestrial sites is also described relating to rootlet damage.	2-s2.0-85029427198	no		not about detections in aquatic environment
2429	3196	Kanishka, G., Eldho, T.I.	Watershed classification using Isomap technique and hydrometeorological attributes	2017	Journal of Hydrologic Engineering	22	10	4017040	NA	NA	NA	NA	10.1061/(ASCE)HE.1943-5584.0001562	https://www.scopus.com/inward/record.url?eid=2-s2.0-85024374775&partnerID=40&md5=6ee9b1257c5afbe67d932a641b95c108	Article	NA	Scopus	Â© 2017 American Society of Civil Engineers.Classification of watersheds into hydrologically similar groups prior to regionalization is essential for predicting streamflow in ungauged basins. The objective of this study was to improve the efficiency of classification for finding hydrologically similar watersheds by applying dimensionality reduction techniques. A new nonlinear dimensionality reduc…	Watershed classification using Isomap technique and hydrometeorological attributes <U+FFFD><U+FFFD> 2017 American Society of Civil Engineers.Classification of watersheds into hydrologically similar groups prior to regionalization is essential for predicting streamflow in ungauged basins. The objective of this study was to improve the efficiency of classification for finding hydrologically similar…	A new nonlinear dimensionality reduction technique called Isomap is applied for the first time along with nonlinear principal component analysis (NLPCA) and principal component analysis (PCA) to improve the efficiency of watershed classification.	2-s2.0-85024374775	no		not about detections in aquatic environment
1149	7038	Ormsby, M.J., Caws, T., Burchmore, R., Wallis, T., Verner-Jeffreys, D.W., Davies, R.L.	Yersinia ruckeri isolates recovered from diseased Atlantic Salmon (Salmo salar) in Scotland are more diverse than those from rainbow trout (Oncorhynchus mykiss) and represent distinct subpopulations	2016	Applied and Environmental Microbiology	82	19	NA	5785	5794	NA	4	10.1128/AEM.01173-16	https://www.scopus.com/inward/record.url?eid=2-s2.0-84987914570&partnerID=40&md5=995845b5582f4079ec25440f6217775c	Article	NA	Scopus	Yersinia ruckeri is the etiological agent of enteric redmouth (ERM) disease of farmed salmonids. Enteric redmouth disease is traditionally associated with rainbow trout (Oncorhynchus mykiss, Walbaum), but its incidence in Atlantic salmon (Salmo salar) is increasing. Yersinia ruckeri isolates recovered from diseased Atlantic salmon have been poorly characterized, and very little is known about the…	Yersinia ruckeri isolates recovered from diseased Atlantic Salmon (Salmo salar) in Scotland are more diverse than those from rainbow trout (Oncorhynchus mykiss) and represent distinct subpopulations Yersinia ruckeri is the etiological agent of enteric redmouth (ERM) disease of farmed salmonids. Enteric redmouth disease is traditionally associated with rainbow trout (Oncorhynchus mykiss, Walbaum),…	A new O serotype (designated O8) was identified in 56 biotype 1 Atlantic salmon isolates and was the most common serotype identified from 2006 to 2011 and in 2014, suggesting an increased prevalence during the time period sampled.	2-s2.0-84987914570	no		new serotype in atlanic salmon
2600	21348	Wacey, D., Saunders, M., Kong, C., Kilburn, M.R.	A new occurrence of ambient inclusion trails from the ~1900-million-year-old Gunflint Formation, Ontario: nanocharacterization and testing of potential formation mechanisms	2016	Geobiology	14	5	NA	440	456	NA	2	10.1111/gbi.12186	https://www.scopus.com/inward/record.url?eid=2-s2.0-85028250793&partnerID=40&md5=0832dfc77b1c9c73818ad2e72bcb64fa	Article	NA	Scopus	Â© 2016 John Wiley & Sons Ltd.Ambient inclusion trails (AITs) are tubular microstructures thought to form when a microscopic mineral crystal is propelled through a fine-grained rock matrix. Here, we report a new occurrence of AITs from a fossilized microbial mat within the 1878-Ma Gunflint Formation, at Current River, Ontario. The AITs are 1-15 Î¼m in diameter, have pyrite as the propelled crysta…	A new occurrence of ambient inclusion trails from the ~1900-million-year-old Gunflint Formation, Ontario: nanocharacterization and testing of potential formation mechanisms <U+FFFD><U+FFFD> 2016 John Wiley & Sons Ltd.Ambient inclusion trails (AITs) are tubular microstructures thought to form when a microscopic mineral crystal is propelled through a fine-grained rock matrix. Here, we report a new …	A new occurrence of ambient inclusion trails from the ~1900-million-year-old Gunflint Formation, Ontario: nanocharacterization and testing of potential formation mechanisms <U+FFFD><U+FFFD> 2016 John Wiley & Sons Ltd.	2-s2.0-85028250793	no		not about detections in aquatic environment
3255	18616	PÃ¡lfy, J., KovÃ¡cs, Z., Price, G.D., VÃ¶rÃ¶s, A., Johannson, G.G.	A new occurrence of the early jurassic brachiopod anarhynchia from the canadian cordillera confirms its membership in chemosynthesis-based ecosystems	2017	Canadian Journal of Earth Sciences	54	12	NA	1179	1193	NA	NA	10.1139/cjes-2017-0179	https://www.scopus.com/inward/record.url?eid=2-s2.0-85041739963&partnerID=40&md5=378cbd214b417caed470877313591299	Article	NA	Scopus	Â© 2017, Canadian Science Publishing. All rights reserved. Cold seeps, where seepage of hydrocarbon-rich fluids occurs in the sea floor, are sites that harbor highly specialized ecosystems associated with distinctive carbonate sediments. Although their Mesozoic record is scarce and patchy, it commonly includes dimerelloid rhynchonellide brachiopods. Here we report a monospecific assemblage of Ana…	A new occurrence of the early jurassic brachiopod anarhynchia from the canadian cordillera confirms its membership in chemosynthesis-based ecosystems <U+FFFD><U+FFFD> 2017, Canadian Science Publishing. All rights reserved. Cold seeps, where seepage of hydrocarbon-rich fluids occurs in the sea floor, are sites that harbor highly specialized ecosystems associated with distinctive carbonate sediment…	A new occurrence of the early jurassic brachiopod anarhynchia from the canadian cordillera confirms its membership in chemosynthesis-based ecosystems <U+FFFD><U+FFFD> 2017, Canadian Science Publishing.	2-s2.0-85041739963	No		not about first detection
635	6848	Ã–zcan, H.M., Aydin, T.	A new PANI biosensor based on catalase for cyanide determination	2016	Artificial Cells, Nanomedicine and Biotechnology	44	2	NA	664	671	NA	NA	10.3109/21691401.2014.978979	https://www.scopus.com/inward/record.url?eid=2-s2.0-84964388762&partnerID=40&md5=d585eef4530c1ebab7d34b4b7d831a4d	Article	NA	Scopus	Copyright Â© 2014 Informa Healthcare USA, Inc.Cyanide is one of the most widespread of compounds measured in environmental analysis due to their toxic effects on environment and health. We report a highly sensitive, reliable, selective amperometric sensor for determination of cyanide, using a polyaniline conductive polymer. The enzyme catalase was immobilized by electropolymerization. The steps d…	A new PANI biosensor based on catalase for cyanide determination Copyright <U+FFFD><U+FFFD> 2014 Informa Healthcare USA, Inc.Cyanide is one of the most widespread of compounds measured in environmental analysis due to their toxic effects on environment and health. We report a highly sensitive, reliable, selective amperometric sensor for determination of cyanide, using a polyaniline conductive pol…	A new PANI biosensor based on catalase for cyanide determination Copyright <U+FFFD><U+FFFD> 2014 Informa Healthcare USA, Inc.	2-s2.0-84964388762	no		new identificaiton method
398	9121	Jayaprakash, K.S., Banerjee, U., Sen, A.K.	Dynamics of Aqueous Droplets at the Interface of Coflowing Immiscible Oils in a Microchannel	2016	Langmuir	32	8	NA	2136	2143	NA	6	10.1021/acs.langmuir.5b04116	https://www.scopus.com/inward/record.url?eid=2-s2.0-84959275783&partnerID=40&md5=0936f5142e7f6bbb6bbc5f0812bd8e80	Article	NA	Scopus	Â© 2016 American Chemical Society. We report the dynamics of aqueous droplets of different size and viscosity at the interface of a coflowing stream of immiscible oils (i.e., primary and secondary continuous phases) in a microchannel, at low Re. The lateral migration of droplets introduced into the primary continuous phase toward the interface and subsequent selective migration of droplets across…	Dynamics of Aqueous Droplets at the Interface of Coflowing Immiscible Oils in a Microchannel <U+FFFD><U+FFFD> 2016 American Chemical Society. We report the dynamics of aqueous droplets of different size and viscosity at the interface of a coflowing stream of immiscible oils (i.e., primary and secondary continuous phases) in a microchannel, at low Re. The lateral migration of droplets introduced i…	A new paradigm of migration and sorting of droplets is reported, which could find importance in chemical and biological applications.	2-s2.0-84959275783	no		not about detections in aquatic environment
2164	3594	Li, S.-W., Wang, Y.-H., Lin, A.Y.-C.	Ecotoxicological effect of ketamine: Evidence of acute, chronic and photolysis toxicity to Daphnia magna	2017	Ecotoxicology and Environmental Safety	143	NA	NA	173	179	NA	1	10.1016/j.ecoenv.2017.05.040	https://www.scopus.com/inward/record.url?eid=2-s2.0-85019629962&partnerID=40&md5=7d33951993c5eb3ed6913a0387216af5	Article	NA	Scopus	Â© 2017 Elsevier Inc. Ketamine has been increasingly used in medicine and has the potential for abuse or illicit use around the world. Ketamine cannot be removed by conventional wastewater treatment plants. Although ketamine and its metabolite norketamine have been detected to a significant degree in effluents and aquatic environments, their ecotoxicity effects in aquatic organisms remain undefin…	Ecotoxicological effect of ketamine: Evidence of acute, chronic and photolysis toxicity to Daphnia magna <U+FFFD><U+FFFD> 2017 Elsevier Inc. Ketamine has been increasingly used in medicine and has the potential for abuse or illicit use around the world. Ketamine cannot be removed by conventional wastewater treatment plants. Although ketamine and its metabolite norketamine have been detected to a …	A new photolysis byproduct (M.W. 241) of norketamine that accumulates during irradiation was identified for the first time.	2-s2.0-85019629962	no		new toxicity results
1869	18037	Luan, J., Shen, Y., Wang, S., Guo, N.	Synthesis, property characterization and photocatalytic activity of the polyaniline/BiYTi<inf>2</inf>O<inf>7</inf>polymer composite	2017	Polymers	9	3	69	NA	NA	NA	1	10.3390/polym9030069	https://www.scopus.com/inward/record.url?eid=2-s2.0-85015001300&partnerID=40&md5=a5c5905f218129c202270da49349101a	Article	Open Access	Scopus	Â© 2017 by the authors.A new polyaniline/BiYTi2O7 polymer composite was synthesized by chemical oxidation in-situ polymerization method for the first time. The effect of polyaniline doping on structural and catalytic properties of BiYTi2O7 was reported. The structural properties of novel polyaniline/BiYTi2O7 have been characterized by X-ray diffraction, scanning electron microscopy, X-ray photoel…	Synthesis, property characterization and photocatalytic activity of the polyaniline/BiYTi<inf>2</inf>O<inf>7</inf>polymer composite <U+FFFD><U+FFFD> 2017 by the authors.A new polyaniline/BiYTi2O7 polymer composite was synthesized by chemical oxidation in-situ polymerization method for the first time. The effect of polyaniline doping on structural and catalytic properties of BiYTi2O7 was reported.…	A new polyaniline/BiYTi2O7 polymer composite was synthesized by chemical oxidation in-situ polymerization method for the first time.	2-s2.0-85015001300	no		not about detections in aquatic environment
2737	2564	SaÃ§macÄ±, Åž., SaÃ§macÄ±, M.	A new procedure for determination of nickel in some fake jewelry and cosmetics samples after dispersive liquidâ€“liquid microextraction by FAAS	2017	Applied Organometallic Chemistry	31	11	NA	2381	2388	NA	NA	10.1002/aoc.4081	https://www.scopus.com/inward/record.url?eid=2-s2.0-85030148381&partnerID=40&md5=2f613b456071a6a83d2d139ab5b3a1d0	Article	NA	Scopus	Copyright Â© 2017 John Wiley & Sons, Ltd. A new, simple and cheap dispersive liquidâ€“liquid microextraction (DLLME) procedure was optimized for the preconcentration of trace amounts of Ni(II) as a prior step to its determination by flame atomic absorption spectrometry (FAAS). It is based on the microextraction of nickel, where appropriate amounts of the extraction solvent (CHCl3), disperser solv…	A new procedure for determination of nickel in some fake jewelry and cosmetics samples after dispersive liquid<U+FFFD><U+FFFD><U+FFFD>liquid microextraction by FAAS Copyright <U+FFFD><U+FFFD> 2017 John Wiley & Sons, Ltd. A new, simple and cheap dispersive liquid<U+FFFD><U+FFFD><U+FFFD>liquid microextraction (DLLME) procedure was optimized for the preconcentration of trace amounts of Ni(II) as a p…	A new procedure for determination of nickel in some fake jewelry and cosmetics samples after dispersive liquid<U+FFFD><U+FFFD><U+FFFD>liquid microextraction by FAAS Copyright <U+FFFD><U+FFFD> 2017 John Wiley & Sons, Ltd.	2-s2.0-85030148381	no		not about detections in aquatic environment
990	21701	LeÅ›niewska, B., Jeglikowska, A., Godlewska-Å»yÅ‚kiewicz, B.	Chromium Speciation in Wastewater and Sewage by Solid-Phase Extraction Using a New Diphenylcarbazone-Incorporated Resin	2016	Water, Air, and Soil Pollution	227	8	291	NA	NA	NA	3	10.1007/s11270-016-2974-0	https://www.scopus.com/inward/record.url?eid=2-s2.0-84979752435&partnerID=40&md5=b9ae80abcebd9379cec7c011d052cb97	Article	Open Access	Scopus	Â© 2016, The Author(s). A new procedure for the determination of chromium species in polluted environmental samples by flame atomic absorption spectrometry was developed in this work. A new material containing 1,5-diphenylcarbazone included in a polymeric matrix was prepared and employed as a solid-phase extraction material for selective separation of Cr(III) ions under dynamic conditions. Chromi…	Chromium Speciation in Wastewater and Sewage by Solid-Phase Extraction Using a New Diphenylcarbazone-Incorporated Resin <U+FFFD><U+FFFD> 2016, The Author(s). A new procedure for the determination of chromium species in polluted environmental samples by flame atomic absorption spectrometry was developed in this work. A new material containing 1,5-diphenylcarbazone included in a polymeric matrix wa…	A new procedure for the determination of chromium species in polluted environmental samples by flame atomic absorption spectrometry was developed in this work.	2-s2.0-84979752435	no		new identificaiton method
633	20672	Habibi, A., Vivien, C., Boulet, B., Cossonnet, C., Gurriaran, R., Gleizes, M., Cote, G., LariviÃ¨re, D.	A rapid sequential separation of actinides and radiostrontium coupled to ICP-MS and gas proportional counting	2016	Journal of Radioanalytical and Nuclear Chemistry	310	1	NA	217	227	NA	3	10.1007/s10967-016-4834-1	https://www.scopus.com/inward/record.url?eid=2-s2.0-84964331108&partnerID=40&md5=b1b0e4d16e92dea500e9345dd68d99e8	Article	NA	Scopus	Â© 2016, AkadÃ©miai KiadÃ³, Budapest, Hungary.A new protocol designed for the rapid determination of U, Th, Pu, Np, Am and Sr in up to 500 mL of river water samples has been developed. The new method employs chromatographic separation, using TEVA, TRU and Sr resins, coupled to an inductively coupled plasma mass spectrometry and to a gas proportional counting (GPC). Excellent figures of merit char…	A rapid sequential separation of actinides and radiostrontium coupled to ICP-MS and gas proportional counting <U+FFFD><U+FFFD> 2016, Akad<U+FFFD><U+FFFD>miai Kiad<U+FFFD><U+FFFD>, Budapest, Hungary.A new protocol designed for the rapid determination of U, Th, Pu, Np, Am and Sr in up to 500 mL of river water samples has been developed. The new method employs chromatographic separation, using TEVA,…	A new protocol designed for the rapid determination of U, Th, Pu, Np, Am and Sr in up to 500 mL of river water samples has been developed.	2-s2.0-84964331108	no		new identificaiton method
3109	1798	Villamizar-Gallardo, R.A., Osma, J.F., OrtÃ­z, O.O.	New technique for direct fluoroimmunomagnetic detection of rotavirus in water samples	2017	Journal of Water and Health	15	6	NA	932	941	NA	NA	10.2166/wh.2017.028	https://www.scopus.com/inward/record.url?eid=2-s2.0-85038966324&partnerID=40&md5=c6aad1d43da6b8e0dd1ecf00851dc18f	Article	NA	Scopus	Â© IWA Publishing 2017. A new rapid, sensitive and selective method for rotavirus detection in water samples is described in this paper. Amino pink magnetic microparticles were functionalized with monoclonal antibodies and used to capture, concentrate, separate and detect infectious rotavirus particles in distilled and drinking water samples. The fluorescence of the microparticles was used to det…	New technique for direct fluoroimmunomagnetic detection of rotavirus in water samples <U+FFFD><U+FFFD> IWA Publishing 2017. A new rapid, sensitive and selective method for rotavirus detection in water samples is described in this paper. Amino pink magnetic microparticles were functionalized with monoclonal antibodies and used to capture, concentrate, separate and detect infectious rotavirus parti…	A new rapid, sensitive and selective method for rotavirus detection in water samples is described in this paper.	2-s2.0-85038966324	no		new identificaiton method
2718	3436	FuÄÃ­k, P., ZajÃ­Äek, A., KaplickÃ¡, M., DuffkovÃ¡, R., PeterkovÃ¡, J., MaxovÃ¡, J., TakÃ¡covÃ¡, Å .	Incorporating rainfall-runoff events into nitrate-nitrogen and phosphorus load assessments for small tile-drained catchments	2017	Water (Switzerland)	9	9	712	NA	NA	NA	1	10.3390/w9090712	https://www.scopus.com/inward/record.url?eid=2-s2.0-85029718746&partnerID=40&md5=fbb38392163fceca1194cf2e7c0d377c	Article	Open Access	Scopus	Â© 2017 by the authors. Rainfall-runoff events significantly influence water runoff and the loss of pollutants from tile-drained agricultural land. We monitored ten small (4 to 38 ha) tile-drained catchments in Czechia for three to five years (2012 to 2016). The discharge was measured continuously; a regular 14-day scheme of water quality monitoring was accompanied with event sampling provided by…	Incorporating rainfall-runoff events into nitrate-nitrogen and phosphorus load assessments for small tile-drained catchments <U+FFFD><U+FFFD> 2017 by the authors. Rainfall-runoff events significantly influence water runoff and the loss of pollutants from tile-drained agricultural land. We monitored ten small (4 to 38 ha) tile-drained catchments in Czechia for three to five years (2012 to 2016). T…	A new semi-automated algorithm was developed for the identification of runoff events (RE) based on discharge and water temperature changes.	2-s2.0-85029718746	no		not about detections in aquatic environment
1011	19911	Ma, M., Huang, M., Leng, P.	Abundance and distribution of immature mosquitoes in urban rivers proximate to their larval habitats	2016	Acta Tropica	163	NA	NA	121	129	NA	2	10.1016/j.actatropica.2016.08.010	https://www.scopus.com/inward/record.url?eid=2-s2.0-84981188308&partnerID=40&md5=ea8e388d8c8b6e0e557ec4495af96356	Article	NA	Scopus	Â© 2016Whether ecological restoration of polluted urban rivers would provide suitable breeding habitats for some mosquitoes was not clear yet. It was therefore important to determine how altered river conditions influence mosquito ecology. Monthly data on water quality and larval density were obtained to determine the effects of river systems on the distribution and abundance of immature mosquito…	Abundance and distribution of immature mosquitoes in urban rivers proximate to their larval habitats <U+FFFD><U+FFFD> 2016Whether ecological restoration of polluted urban rivers would provide suitable breeding habitats for some mosquitoes was not clear yet. It was therefore important to determine how altered river conditions influence mosquito ecology. Monthly data on water quality and larval den…	A new species (Culex fuscanus) was reported in certain districts.	2-s2.0-84981188308	no		not about microorganisms (mosquitos)
2171	14487	Liu, W., Wang, Y., Bai, Z., Li, Y., Wang, Y., Chen, L., Xu, L., Diwu, J., Chai, Z., Wang, S.	Hydrolytically Stable Luminescent Cationic Metal Organic Framework for Highly Sensitive and Selective Sensing of Chromate Anions in Natural Water Systems	2017	ACS Applied Materials and Interfaces	9	19	NA	16448	16457	NA	38	10.1021/acsami.7b03914	https://www.scopus.com/inward/record.url?eid=2-s2.0-85019657808&partnerID=40&md5=f59a74c2090442ed6c802f546ade89bd	Article	NA	Scopus	Â© 2017 American Chemical Society.Effective detection of chromate anions in aqueous solution is highly desirable because of their high solubility, environmental mobility, carcinogenicity, and bioaccumulation effect. A new strategy for precise detection of chromate anions in the presence of a large excess of other anions, such as Cl-, NO3-, and HCO3-, in drinking water and natural water systems re…	Hydrolytically Stable Luminescent Cationic Metal Organic Framework for Highly Sensitive and Selective Sensing of Chromate Anions in Natural Water Systems <U+FFFD><U+FFFD> 2017 American Chemical Society.Effective detection of chromate anions in aqueous solution is highly desirable because of their high solubility, environmental mobility, carcinogenicity, and bioaccumulation effect. A new strategy …	A new strategy for precise detection of chromate anions in the presence of a large excess of other anions, such as Cl-, NO3-, and HCO3-, in drinking water and natural water systems remains a challenge.	2-s2.0-85019657808	No		new identificaiton method
548	19875	Li, W., Yao, W., Zhu, W., Xi, C., Duan, T.	In situ preparation of mycelium/bayberry tannin for the removal of strontium from aqueous solution	2016	Journal of Radioanalytical and Nuclear Chemistry	310	2	NA	495	504	NA	1	10.1007/s10967-016-4808-3	https://www.scopus.com/inward/record.url?eid=2-s2.0-84962040676&partnerID=40&md5=67eb3470936864ac56f224c55049c073	Article	NA	Scopus	Â© 2016, AkadÃ©miai KiadÃ³, Budapest, Hungary.A new sustainable filamentous fungi-based process is reported to synthesize mycelium/bayberry tannin (BT) hybrid materials. The hybrid materials are produced with fungi growing in solution, where the cell wall interacted with BT by hydrogen-bond from the phenolic hydroxyl and amino in protein. In the adsorption experiment, This hybrid biologic materia…	In situ preparation of mycelium/bayberry tannin for the removal of strontium from aqueous solution <U+FFFD><U+FFFD> 2016, Akad<U+FFFD><U+FFFD>miai Kiad<U+FFFD><U+FFFD>, Budapest, Hungary.A new sustainable filamentous fungi-based process is reported to synthesize mycelium/bayberry tannin (BT) hybrid materials. The hybrid materials are produced with fungi growing in solution, where the cell wall in…	A new sustainable filamentous fungi-based process is reported to synthesize mycelium/bayberry tannin (BT) hybrid materials.	2-s2.0-84962040676	No		not about detections in aquatic environment
704	21060	Marone, A., Carmona-MartÃ­nez, A.A., Sire, Y., Meudec, E., Steyer, J.P., Bernet, N., Trably, E.	Bioelectrochemical treatment of table olive brine processing wastewater for biogas production and phenolic compounds removal	2016	Water Research	100	NA	NA	316	325	NA	14	10.1016/j.watres.2016.05.008	https://www.scopus.com/inward/record.url?eid=2-s2.0-84968764982&partnerID=40&md5=cbaa0ab198d46828e5dbd4f02cbc0457	Article	NA	Scopus	Â© 2016 Elsevier Ltd. Industry of table olives is widely distributed over the Mediterranean countries and generates large volumes of processing wastewaters (TOPWs). TOPWs contain high levels of organic matter, salt, and phenolic compounds that are recalcitrant to microbial degradation. This work aims to evaluate the potential of bioelectrochemical systems to simultaneously treat real TOPWs and re…	Bioelectrochemical treatment of table olive brine processing wastewater for biogas production and phenolic compounds removal <U+FFFD><U+FFFD> 2016 Elsevier Ltd. Industry of table olives is widely distributed over the Mediterranean countries and generates large volumes of processing wastewaters (TOPWs). TOPWs contain high levels of organic matter, salt, and phenolic compounds that are recalcitrant…	A new theoretical degradation pathway was proposed after identification of the metabolic by-products.	2-s2.0-84968764982	No		not about detections in aquatic environment
2752	2523	SaÃ§maci, Åž., SaÃ§maci, M., Ãœlgen, A.	A New Turn-On Fluorometric Detection Method for the Determination of Ag(I) in Some Food and Water Samples	2017	Journal of AOAC International	100	6	NA	1854	1860	NA	2	10.5740/jaoacint.17-0090	https://www.scopus.com/inward/record.url?eid=2-s2.0-85030316055&partnerID=40&md5=4154ff5195b2a40747812e2a6625a660	Article	NA	Scopus	A new sensitive and selective turn-on fluorometry procedure for the determination of silver using a laboratory-built fluorometry system is described herein. After synthesis and characterization, a [2-((E)-{[3',6'-bis(ethylamino)-2',7'-dimethyl-3-oxospiro[isoindole-1,9'-xanthen]-2(3H)-yl]imino}methyl)cyclopenta-2,4-dien-1-yl] (cyclopenta-2,4-dien-1-yl)iron (DKMS) fluorescent reagent was used for t…	A New Turn-On Fluorometric Detection Method for the Determination of Ag(I) in Some Food and Water Samples A new sensitive and selective turn-on fluorometry procedure for the determination of silver using a laboratory-built fluorometry system is described herein. After synthesis and characterization, a [2-((E)-{[3',6'-bis(ethylamino)-2',7'-dimethyl-3-oxospiro[isoindole-1,9'-xanthen]-2(3H)-yl]imino…	A New Turn-On Fluorometric Detection Method for the Determination of Ag(I) in Some Food and Water Samples A new sensitive and selective turn-on fluorometry procedure for the determination of silver using a laboratory-built fluorometry system is described herein.	2-s2.0-85030316055	no		new identificaiton method
3053	10723	Xu, J., Jie, X., Xie, F., Yang, H., Wei, W., Xia, Z.	Flavonoid moiety-incorporated carbon dots for ultrasensitive and highly selective fluorescence detection and removal of Pb<sup>2+</sup>	2018	Nano Research	11	7	NA	3648	3657	NA	NA	10.1007/s12274-017-1931-6	https://www.scopus.com/inward/record.url?eid=2-s2.0-85037719556&partnerID=40&md5=31f2ad616a658652f47a019f694f7de3	Article	NA	Scopus	Â© 2017, Tsinghua University Press and Springer-Verlag GmbH Germany, part of Springer Nature. A new type of self-targeting carbon dot (CD-Fla) for the detection of the toxic heavy metal ion Pb2+ was synthesized via a one-pot hydrothermal route using flavonoid extracts of Ginkgo biloba leaves as the starting material. As-prepared CD-Fla exhibited excellent biocompatibility and strong blue emission…	Flavonoid moiety-incorporated carbon dots for ultrasensitive and highly selective fluorescence detection and removal of Pb<sup>2+</sup> <U+FFFD><U+FFFD> 2017, Tsinghua University Press and Springer-Verlag GmbH Germany, part of Springer Nature. A new type of self-targeting carbon dot (CD-Fla) for the detection of the toxic heavy metal ion Pb2+ was synthesized via a one-pot hydrothermal route using…	A new type of self-targeting carbon dot (CD-Fla) for the detection of the toxic heavy metal ion Pb2+ was synthesized via a one-pot hydrothermal route using flavonoid extracts of Ginkgo biloba leaves as the starting material.	2-s2.0-85037719556	no		new identificaiton method
1290	4703	Li, Q.-L., Wang, L.-L., Wang, X., Wang, M.-L., Zhao, R.-S.	Magnetic metal-organic nanotubes: An adsorbent for magnetic solid-phase extraction of polychlorinated biphenyls from environmental and biological samples	2016	Journal of Chromatography A	1449	NA	NA	39	47	NA	16	10.1016/j.chroma.2016.04.060	https://www.scopus.com/inward/record.url?eid=2-s2.0-84992303266&partnerID=40&md5=bb0689c9164f9aca5e1f2c5d489c7d26	Article	NA	Scopus	Â© 2016 Elsevier B.V. A new type of three-dimensional, echinus-like magnetic Fe3O4 @ cobalt(II)-based metal-organic nanotube (Fe3O4 @ Co-MONT) yolk-shell microspheres, have been designed and synthesized for the first time. Fe3O4 @ Co-MONTs yolk-shell microspheres were characterized by scanning electron micrographs, transmission electron microscopy, Fourier transform infrared spectra, X-ray diffra…	Magnetic metal-organic nanotubes: An adsorbent for magnetic solid-phase extraction of polychlorinated biphenyls from environmental and biological samples <U+FFFD><U+FFFD> 2016 Elsevier B.V. A new type of three-dimensional, echinus-like magnetic Fe3O4 @ cobalt(II)-based metal-organic nanotube (Fe3O4 @ Co-MONT) yolk-shell microspheres, have been designed and synthesized for the first time. Fe3O4 @ …	A new type of three-dimensional, echinus-like magnetic Fe3O4 @ cobalt(II)-based metal-organic nanotube (Fe3O4 @ Co-MONT) yolk-shell microspheres, have been designed and synthesized for the first time.	2-s2.0-84992303266	No		not about detections in aquatic environment
54	8125	Derayea, S.M., Ahmed, H.M., Abdelmageed, O.H., Haredy, A.M.	New valid spectrofluorimetric method for determination of selected cephalosporins in different pharmaceutical formulations using safranin as fluorophore	2016	Spectrochimica Acta - Part A: Molecular and Biomolecular Spectroscopy	153	NA	NA	655	660	NA	3	10.1016/j.saa.2015.10.001	https://www.scopus.com/inward/record.url?eid=2-s2.0-84943514912&partnerID=40&md5=c02a019c032f26fb66d91f2590eeeca2	Article	NA	Scopus	Â© 2015 Published by Elsevier B.V. A new validated spectrofluorimetric method has been developed for the determination of some cephalosporins namely; cefepime, cefaclor, cefadroxil, cefpodoxime and cefexime. The method was based on the reaction of these drugs with safranin in slightly alkaline medium (pH 8.0), to form ion-association complexes. The fluorescent products were extracted into chlorof…	New valid spectrofluorimetric method for determination of selected cephalosporins in different pharmaceutical formulations using safranin as fluorophore <U+FFFD><U+FFFD> 2015 Published by Elsevier B.V. A new validated spectrofluorimetric method has been developed for the determination of some cephalosporins namely; cefepime, cefaclor, cefadroxil, cefpodoxime and cefexime. The method was based on …	A new validated spectrofluorimetric method has been developed for the determination of some cephalosporins namely; cefepime, cefaclor, cefadroxil, cefpodoxime and cefexime.	2-s2.0-84943514912	No		not about detections in aquatic environment
1004	19437	Tuzen, M., Bagda, E., Hazer, B.	Solid phase extraction of uranium on a new brush type graft copolymer and spectrophotometric determination of its in water samples	2016	Journal of Radioanalytical and Nuclear Chemistry	310	3	NA	1255	1263	NA	1	10.1007/s10967-016-4949-4	https://www.scopus.com/inward/record.url?eid=2-s2.0-84980025267&partnerID=40&md5=c03c72011b6b764f0d24b42bff3bb823	Article	NA	Scopus	Â© 2016, AkadÃ©miai KiadÃ³, Budapest, Hungary.A new versatile solid phase extraction and spectrophotometric determination of uranium (VI) was proposed with using poly(caprolactone-b-vinyl benzyl chloride-g-dimethyl amino ethyl methacrylate), poly(CL-b-VB-g-DMAEMA), amphiphilic brush type block/graft copolymer. The method is based on the adsorption of uranium(VI)-pyrocatechol violet complex on sur…	Solid phase extraction of uranium on a new brush type graft copolymer and spectrophotometric determination of its in water samples <U+FFFD><U+FFFD> 2016, Akad<U+FFFD><U+FFFD>miai Kiad<U+FFFD><U+FFFD>, Budapest, Hungary.A new versatile solid phase extraction and spectrophotometric determination of uranium (VI) was proposed with using poly(caprolactone-b-vinyl benzyl chloride-g-dimethyl amino ethyl…	A new versatile solid phase extraction and spectrophotometric determination of uranium (VI) was proposed with using poly(caprolactone-b-vinyl benzyl chloride-g-dimethyl amino ethyl methacrylate), poly(CL-b-VB-g-DMAEMA), amphiphilic brush type block/graft copolymer.	2-s2.0-84980025267	No		not about detections in aquatic environment
2489	4163	Brainina, K.Z., Tarasov, A.V., Khodos, M.Y.	Determination of the oxidant activity of chlorinated water by chronoamperometry	2017	Journal of Analytical Chemistry	72	8	NA	911	916	NA	NA	10.1134/S1061934817080056	https://www.scopus.com/inward/record.url?eid=2-s2.0-85026671941&partnerID=40&md5=0ee0e5f8cd3f6ec1e0c7cc02941068ea	Article	NA	Scopus	Â© 2017, Pleiades Publishing, Ltd. A new version of the chronoamperometric method, adapted to the determination of the oxidative (oxidant) activity of a medium on an example of chlorinated water, was proposed. The supporting solution contained K4Fe(CN)6. By its oxidation with oxidants present in the sample, K3Fe(CN)6 formed; its reduction current served as an analytical signal. The current of K3F…	Determination of the oxidant activity of chlorinated water by chronoamperometry <U+FFFD><U+FFFD> 2017, Pleiades Publishing, Ltd. A new version of the chronoamperometric method, adapted to the determination of the oxidative (oxidant) activity of a medium on an example of chlorinated water, was proposed. The supporting solution contained K4Fe(CN)6. By its oxidation with oxidants present in the samp…	A new version of the chronoamperometric method, adapted to the determination of the oxidative (oxidant) activity of a medium on an example of chlorinated water, was proposed.	2-s2.0-85026671941	No		new identificaiton method
2684	207	Wong, A., Santos, A.M., Fatibello-Filho, O.	Simultaneous determination of paracetamol and levofloxacin using a glassy carbon electrode modified with carbon black, silver nanoparticles and PEDOT:PSS film	2018	Sensors and Actuators, B: Chemical	255	NA	NA	2264	2273	NA	3	10.1016/j.snb.2017.09.020	https://www.scopus.com/inward/record.url?eid=2-s2.0-85029419083&partnerID=40&md5=8d3ef6fd00b1cd83df632a62124b02f3	Article	NA	Scopus	Â© 2017 Elsevier B.V. A new voltammetric sensor is proposed for the simultaneous determination of paracetamol (PAR) and levofloxacin (LEV), using a glassy carbon electrode (GCE) modified with silver nanoparticles (AgNPs), carbon black (CB), and poly(3,4-ethylenedioxythiophene)-poly(styrenesulfonate) (PEDOT:PSS). The modification of the electrode surface was performed by drop-casting dispersion. M…	Simultaneous determination of paracetamol and levofloxacin using a glassy carbon electrode modified with carbon black, silver nanoparticles and PEDOT:PSS film <U+FFFD><U+FFFD> 2017 Elsevier B.V. A new voltammetric sensor is proposed for the simultaneous determination of paracetamol (PAR) and levofloxacin (LEV), using a glassy carbon electrode (GCE) modified with silver nanoparticles (AgNPs), carb…	A new voltammetric sensor is proposed for the simultaneous determination of paracetamol (PAR) and levofloxacin (LEV), using a glassy carbon electrode (GCE) modified with silver nanoparticles (AgNPs), carbon black (CB), and poly(3,4-ethylenedioxythiophene)-poly(styrenesulfonate) (PEDOT:PSS).	2-s2.0-85029419083	no		new identificaiton method
1968	15953	Podesta, J.J.	The most intense current sheets in the high-speed solar wind near 1Â AU	2017	Journal of Geophysical Research: Space Physics	122	3	NA	2795	2823	NA	5	10.1002/2016JA023629	https://www.scopus.com/inward/record.url?eid=2-s2.0-85017024680&partnerID=40&md5=09fa282a9361cd8928f845975c5f6b83	Article	NA	Scopus	Â©2017. American Geophysical Union. All Rights Reserved.Electric currents in the solar wind plasma are investigated using 92 ms fluxgate magnetometer data acquired in a high-speed stream near 1 AU. The minimum resolvable scale is roughly 0.18 s in the spacecraft frame or, using Taylor's â€œfrozen turbulenceâ€ approximation, one proton inertial length di in the plasma frame. A new way of identify…	The most intense current sheets in the high-speed solar wind near 1<U+FFFD><U+FFFD>AU <U+FFFD><U+FFFD>2017. American Geophysical Union. All Rights Reserved.Electric currents in the solar wind plasma are investigated using 92 ms fluxgate magnetometer data acquired in a high-speed stream near 1 AU. The minimum resolvable scale is roughly 0.18 s in the spacecraft frame or, using Taylor's <U+FFFD><U+…	A new way of identifying current sheets is developed that utilizes a proxy for the current density J obtained from the derivatives of the three orthogonal components of the observed magnetic field B.	2-s2.0-85017024680	No		not about detections in aquatic environment
617	22273	Pouyan, M., Bagherian, G., Goudarzi, N.	Determination of ultra-trace palladium (II) in water, soil, and food samples by dispersive liquid-liquid microextraction-atomic absorption spectrometry using 2-mercaptobenzimidazole as a complexing agent	2016	Microchemical Journal	127	NA	NA	46	51	NA	16	10.1016/j.microc.2016.02.003	https://www.scopus.com/inward/record.url?eid=2-s2.0-84963801211&partnerID=40&md5=620e38a0c6ade8a4fbae937d6f755284	Article	NA	Scopus	Â© 2016 Elsevier B.V. A new, simple, and rapid method was developed for selective extraction and determination of trace levels of Pd(II) by dispersive liquid-liquid microextraction (DLLME) preconcentration and flame atomic absorption spectrometry detection. In the developed method, 2-mercaptobenzimidazole (MBI) was used as a Pd(II) complexing agent. Chloroform and acetone were selected as the ext…	Determination of ultra-trace palladium (II) in water, soil, and food samples by dispersive liquid-liquid microextraction-atomic absorption spectrometry using 2-mercaptobenzimidazole as a complexing agent <U+FFFD><U+FFFD> 2016 Elsevier B.V. A new, simple, and rapid method was developed for selective extraction and determination of trace levels of Pd(II) by dispersive liquid-liquid microextraction …	A new, simple, and rapid method was developed for selective extraction and determination of trace levels of Pd(II) by dispersive liquid-liquid microextraction (DLLME) preconcentration and flame atomic absorption spectrometry detection.	2-s2.0-84963801211	No		new identificaiton method
2134	4227	Wang, S., Liu, Y., Liu, G., Huang, Y., Zhou, Y.	A New Primer to Amplify pmoA Gene From NC10 Bacteria in the Sediments of Dongchang Lake and Dongping Lake	2017	Current Microbiology	74	8	NA	908	914	NA	NA	10.1007/s00284-017-1260-8	https://www.scopus.com/inward/record.url?eid=2-s2.0-85019230501&partnerID=40&md5=306501672c10283394ee4c6950c245ff	Article	NA	Scopus	Â© 2017, Springer Science+Business Media New York. Nitrite-dependent anaerobic methane oxidation (n-damo) is catalyzed by the NC10 phylum bacterium â€œCandidatus Methylomirabilis oxyferaâ€ (M. oxyfera). Generally, the pmoA gene is applied as a functional marker to test and identify NC10-like bacteria. However, it is difficult to detect the NC10 bacteria from sediments of freshwater lake (Dongcha…	A New Primer to Amplify pmoA Gene From NC10 Bacteria in the Sediments of Dongchang Lake and Dongping Lake <U+FFFD><U+FFFD> 2017, Springer Science+Business Media New York. Nitrite-dependent anaerobic methane oxidation (n-damo) is catalyzed by the NC10 phylum bacterium <U+FFFD><U+FFFD><U+FFFD>Candidatus Methylomirabilis oxyfera<U+FFFD><U+FFFD><U+FFFD> (M. oxyfera). Generally, the pmoA gene is appli…	A newly nested PCR approach was performed using the new primer cmo208 and the previous primers cmo182, cmo682, and cmo568 to detect the NC10 bacteria.	2-s2.0-85019230501	No		new identificaiton method
2023	17592	Tian, X., Chen, L., Li, Y., Yang, C., Nie, Y., Zhou, C., Wang, Y.	Design and synthesis of a molecule with aggregation-induced emission effects and its application in the detection of arsenite in groundwater	2017	Journal of Materials Chemistry C	5	15	NA	3669	3672	NA	3	10.1039/C7TC00363C	https://www.scopus.com/inward/record.url?eid=2-s2.0-85017633183&partnerID=40&md5=0191e1ba32bb0b34dad5f0ebb08740b7	Article	NA	Scopus	Â© The Royal Society of Chemistry.A novel aggregation-induced emission (AIE) active molecule, compound 1, was synthesized for the first time. Simultaneously, an ultra-sensitive and selective chemosensor 2 for the â€œturn-onâ€ sensing of As3+ based on the AIE mechanism has been developed by combining cysteine with compound 1.	Design and synthesis of a molecule with aggregation-induced emission effects and its application in the detection of arsenite in groundwater <U+FFFD><U+FFFD> The Royal Society of Chemistry.A novel aggregation-induced emission (AIE) active molecule, compound 1, was synthesized for the first time. Simultaneously, an ultra-sensitive and selective chemosensor 2 for the <U+FFFD><U+FFFD><U+FFFD>turn-on…	A novel aggregation-induced emission (AIE) active molecule, compound 1, was synthesized for the first time.	2-s2.0-85017633183	No		not about detections in aquatic environment
3943	9326	Yuan, L., Qiu, Z., Lu, Y., Tariq, M., Yuan, L., Yang, J., Li, Z., Lyu, S.	Development of lanthanum hydroxide loaded on molecular sieve adsorbent and mechanistic study for phosphate removal	2018	Journal of Alloys and Compounds	768	NA	NA	953	961	NA	NA	10.1016/j.jallcom.2018.07.230	https://www.scopus.com/inward/record.url?eid=2-s2.0-85050865043&partnerID=40&md5=e89c99b096ece39535a7f22d1020d8fb	Article	NA	Scopus	Â© 2018 Elsevier B.V. A novel and highly effective adsorbent LHMS (lanthanum hydroxide loaded on molecular sieve) for phosphate (PO4) removal was investigated for the first time, possessing huge surface area (582.9836 m2 gâˆ’1) and adsorption capacity (12.2158 mg gâˆ’1) under the circumstance of pH = 5 and 5 mg Lâˆ’1 phosphorus solution. Adsorption capacity of the adsorbent showed up the increasi…	Development of lanthanum hydroxide loaded on molecular sieve adsorbent and mechanistic study for phosphate removal <U+FFFD><U+FFFD> 2018 Elsevier B.V. A novel and highly effective adsorbent LHMS (lanthanum hydroxide loaded on molecular sieve) for phosphate (PO4) removal was investigated for the first time, possessing huge surface area (582.9836 m2 g<U+FFFD><U+FFFD><U+FFFD>1) and adsorption capaci…	A novel and highly effective adsorbent LHMS (lanthanum hydroxide loaded on molecular sieve) for phosphate (PO4) removal was investigated for the first time, possessing huge surface area (582.9836 m2 g<U+FFFD><U+FFFD><U+FFFD>1) and adsorption capacity (12.2158 mg g<U+FFFD><U+FFFD><U+FFFD>1) under the circumstance of pH = 5 and 5 mg L<U+FFFD><U+FFFD><U+FFFD>1 phosphorus solution.	2-s2.0-85050865043	No		not about detections in aquatic environment
1759	16930	Yang, X., Deng, S., Peng, F., Luo, T.	A new adsorbent of a Ce ion-implanted metal-organic framework (MIL-96) with high-efficiency Ce utilization for removing fluoride from water	2017	Dalton Transactions	46	6	NA	1996	2006	NA	3	10.1039/c6dt03934k	https://www.scopus.com/inward/record.url?eid=2-s2.0-85013054730&partnerID=40&md5=d3183e075eff80f373f52c8278fc82dd	Article	NA	Scopus	Â© The Royal Society of Chemistry.A novel Ce(iii) ion-implanted aluminum-trimesic metal-organic framework (Ce-MIL-96) was synthesized for the first time via alcohol-solvent incipient wetness impregnation. Compared to previously reported Ce-contained adsorbents, the fluoride adsorption performance of the new ion-implanted metal-organic framework demonstrated much higher adsorption capacity and mor…	A new adsorbent of a Ce ion-implanted metal-organic framework (MIL-96) with high-efficiency Ce utilization for removing fluoride from water <U+FFFD><U+FFFD> The Royal Society of Chemistry.A novel Ce(iii) ion-implanted aluminum-trimesic metal-organic framework (Ce-MIL-96) was synthesized for the first time via alcohol-solvent incipient wetness impregnation. Compared to previously reported Ce-conta…	A novel Ce(iii) ion-implanted aluminum-trimesic metal-organic framework (Ce-MIL-96) was synthesized for the first time via alcohol-solvent incipient wetness impregnation.	2-s2.0-85013054730	No		not about detections in aquatic environment
3545	10257	Worawit, C., Cocovi-Solberg, D.J., Varanusupakul, P., MirÃ³, M.	In-line carbon nanofiber reinforced hollow fiber-mediated liquid phase microextraction using a 3D printed extraction platform as a front end to liquid chromatography for automatic sample preparation and analysis: A proof of concept study	2018	Talanta	185	NA	NA	611	619	NA	1	10.1016/j.talanta.2018.04.007	https://www.scopus.com/inward/record.url?eid=2-s2.0-85045737563&partnerID=40&md5=886c1d97bd28b81c0f34d41ec40b192f	Article	NA	Scopus	Â© 2018 Elsevier B.V. A novel concept for automation of nanostructured hollow-fiber supported microextraction, combining the principles of liquid-phase microextraction (LPME) and sorbent microextraction synergically, using mesofluidic platforms is proposed herein for the first time, and demonstrated with the determination of acidic drugs (namely, ketoprofen, ibuprofen, diclofenac and naproxen) in…	In-line carbon nanofiber reinforced hollow fiber-mediated liquid phase microextraction using a 3D printed extraction platform as a front end to liquid chromatography for automatic sample preparation and analysis: A proof of concept study <U+FFFD><U+FFFD> 2018 Elsevier B.V. A novel concept for automation of nanostructured hollow-fiber supported microextraction, combining the principles of liquid-p…	A novel concept for automation of nanostructured hollow-fiber supported microextraction, combining the principles of liquid-phase microextraction (LPME) and sorbent microextraction synergically, using mesofluidic platforms is proposed herein for the first time, and demonstrated with the determination of acidic drugs (namely, ketoprofen, ibuprofen, diclofenac and naproxen) in urine as a proof-of-c…	2-s2.0-85045737563	No		not about detections in aquatic environment
132	6265	Zhang, Z., Fu, X., Li, K., Liu, R., Peng, D., He, L., Wang, M., Zhang, H., Zhou, L.	One-step fabrication of electrochemical biosensor based on DNA-modified three-dimensional reduced graphene oxide and chitosan nanocomposite for highly sensitive detection of Hg(II)	2016	Sensors and Actuators, B: Chemical	225	NA	NA	453	462	NA	26	10.1016/j.snb.2015.11.091	https://www.scopus.com/inward/record.url?eid=2-s2.0-84949591018&partnerID=40&md5=3acc9d338e9fc234d2600eb3a731714f	Article	NA	Scopus	Â© 2015 Elsevier B.V. All rights reserved. A novel DNA-modified nanocomposite of three-dimensional reduced graphene oxide and chitosan particles (CS@3D-rGO@DNA) was prepared by one-step method and used as a new electrochemical biosensing strategy to detect Hg2+ in drinking water. This biosensor was fabricated by the chemical coordination of T-Hg2+-T between the T-rich oligonucleotide strands cont…	One-step fabrication of electrochemical biosensor based on DNA-modified three-dimensional reduced graphene oxide and chitosan nanocomposite for highly sensitive detection of Hg(II) <U+FFFD><U+FFFD> 2015 Elsevier B.V. All rights reserved. A novel DNA-modified nanocomposite of three-dimensional reduced graphene oxide and chitosan particles (CS@3D-rGO@DNA) was prepared by one-step method and used as…	A novel DNA-modified nanocomposite of three-dimensional reduced graphene oxide and chitosan particles (CS@3D-rGO@DNA) was prepared by one-step method and used as a new electrochemical biosensing strategy to detect Hg2+ in drinking water.	2-s2.0-84949591018	No		new identificaiton method
3018	12974	Vaghela, C., Kulkarni, M., Haram, S., Aiyer, R., Karve, M.	A novel inhibition based biosensor using urease nanoconjugate entrapped biocomposite membrane for potentiometric glyphosate detection	2018	International Journal of Biological Macromolecules	108	NA	NA	32	40	NA	1	10.1016/j.ijbiomac.2017.11.136	https://www.scopus.com/inward/record.url?eid=2-s2.0-85035815765&partnerID=40&md5=3ee48cdb281ac1b9a1fed018e89dd3b1	Article	NA	Scopus	Â© 2017 A potentiometric biosensor based on agarose-guar gum (A-G) entrapped bio-nanoconjugate of urease with gold nanoparticles (AUNps), has been reported for the first time for glyphosate detection. The biosensor is based on inhibition of urease activity by glyphosate, which was measured by direct potentiometry using ammonium ion selective electrode covered with A-G-urease nanoconjugate membran…	A novel inhibition based biosensor using urease nanoconjugate entrapped biocomposite membrane for potentiometric glyphosate detection <U+FFFD><U+FFFD> 2017 A potentiometric biosensor based on agarose-guar gum (A-G) entrapped bio-nanoconjugate of urease with gold nanoparticles (AUNps), has been reported for the first time for glyphosate detection. The biosensor is based on inhibition of urease act…	A novel inhibition based biosensor using urease nanoconjugate entrapped biocomposite membrane for potentiometric glyphosate detection <U+FFFD><U+FFFD> 2017 A potentiometric biosensor based on agarose-guar gum (A-G) entrapped bio-nanoconjugate of urease with gold nanoparticles (AUNps), has been reported for the first time for glyphosate detection.	2-s2.0-85035815765	No		new identificaiton method
1625	7075	LeÅ›niewska, B., Jakubowska, I., Zambrzycka, E., Godlewska-ZyÅ‚kiewicz, B.	A novel ion-imprinted polymeric sorbent for separation and determination of chromium(III) species in wastewater	2016	Turkish Journal of Chemistry	40	6	NA	933	943	NA	3	10.3906/kim-1606-34	https://www.scopus.com/inward/record.url?eid=2-s2.0-85009910351&partnerID=40&md5=498c45114fa51cf8c0d170517ba62493	Article	NA	Scopus	A new chromium(III) ion-imprinted polymer (IIP) was prepared from a Cr(III)-nicotinate complex (template), acrylamide (functional monomer), and ethylene glycol dimethacrylate (cross-linking agent) using 2,2'-azobisisobutyronitrile as the radical initiator. IIP was characterised and used as a selective sorbent for the solid-phase extraction of Cr(III) ions. The conditions for dynamic separation of…	A novel ion-imprinted polymeric sorbent for separation and determination of chromium(III) species in wastewater A new chromium(III) ion-imprinted polymer (IIP) was prepared from a Cr(III)-nicotinate complex (template), acrylamide (functional monomer), and ethylene glycol dimethacrylate (cross-linking agent) using 2,2'-azobisisobutyronitrile as the radical initiator. IIP was characterised and used…	A novel ion-imprinted polymeric sorbent for separation and determination of chromium(III) species in wastewater A new chromium(III) ion-imprinted polymer (IIP) was prepared from a Cr(III)-nicotinate complex (template), acrylamide (functional monomer), and ethylene glycol dimethacrylate (cross-linking agent) using 2,2'-azobisisobutyronitrile as the radical initiator.	2-s2.0-85009910351	No		new identificaiton method
3532	12075	Chen, J., Yan, D., Xu, Z., Chen, X., Chen, X., Xu, W., Jia, H., Chen, J.	A Novel Redox Precipitation to Synthesize Au-Doped Î±-MnO<inf>2</inf>with High Dispersion toward Low-Temperature Oxidation of Formaldehyde	2018	Environmental Science and Technology	52	8	NA	4728	4737	NA	1	10.1021/acs.est.7b06039	https://www.scopus.com/inward/record.url?eid=2-s2.0-85045553444&partnerID=40&md5=a53e457e9279cc0335b1ccaf2b7f17f6	Article	NA	Scopus	Â© 2018 American Chemical Society. A novel method of redox precipitation was applied for the first time to synthesize a Au-doped Î±-MnO2 catalyst with high dispersion of the Au species. Au nanoparticles (NPs) can be downsized into approximate single atoms by this method, thereby realizing highly efficient utilization of Au element as well as satisfying low-temperature oxidation of formaldehyde (H…	A Novel Redox Precipitation to Synthesize Au-Doped <U+FFFD><U+FFFD>-MnO<inf>2</inf>with High Dispersion toward Low-Temperature Oxidation of Formaldehyde <U+FFFD><U+FFFD> 2018 American Chemical Society. A novel method of redox precipitation was applied for the first time to synthesize a Au-doped <U+FFFD><U+FFFD>-MnO2 catalyst with high dispersion of the Au species. Au nanoparticles (NPs) can be do…	A novel method of redox precipitation was applied for the first time to synthesize a Au-doped <U+FFFD><U+FFFD>-MnO2 catalyst with high dispersion of the Au species.	2-s2.0-85045553444	No		not about detections in aquatic environment
3019	2786	Marensi, E., Ricco, P.	Growth and wall-transpiration control of nonlinear unsteady GÃ¶rtler vortices forced by free-stream vortical disturbances	2017	Physics of Fluids	29	11	114106	NA	NA	NA	NA	10.1063/1.4999993	https://www.scopus.com/inward/record.url?eid=2-s2.0-85036456428&partnerID=40&md5=e23102119cba7347482fd53ff0965263	Article	NA	Scopus	The generation, nonlinear evolution, and wall-transpiration control of unsteady GÃ¶rtler vortices in an incompressible boundary layer over a concave plate is studied theoretically and numerically. GÃ¶rtler rolls are initiated and driven by free-stream vortical perturbations of which only the lowfrequency components are considered because they penetrate the most into the boundary layer. The format…	Growth and wall-transpiration control of nonlinear unsteady G<U+FFFD><U+FFFD>rtler vortices forced by free-stream vortical disturbances The generation, nonlinear evolution, and wall-transpiration control of unsteady G<U+FFFD><U+FFFD>rtler vortices in an incompressible boundary layer over a concave plate is studied theoretically and numerically. G<U+FFFD><U+FFFD>rtler rolls are initiated and drive…	A novel modified version of the Fukagata- Iwamoto-Kasagi identity, used for the first time to study a transitional flow, reveals which terms in the streamwise momentum balance are mostly affected by the wall transpiration, thus offering insight into the increased nonlinear growth of the wall-shear stress.	2-s2.0-85036456428	no		not about detections in aquatic environment
3619	1008	Ahmad, Z.U., Lian, Q., Zappi, M.E., Buchireddy, P.R., Gang, D.D.	Adsorptive removal of resorcinol on a novel ordered mesoporous carbon (OMC) employing COK-19 silica scaffold: Kinetics and equilibrium study	2018	Journal of Environmental Sciences (China)	NA	NA	NA	NA	NA	NA	1	10.1016/j.jes.2018.04.014	https://www.scopus.com/inward/record.url?eid=2-s2.0-85046677839&partnerID=40&md5=67018aa5a2b51315dda846a4d1b5e976	Article in Press	NA	Scopus	Â© 2018 Phenolic compounds and their derivatives have been found in industrial wastewater, which pose threats to the natural environment. Ordered mesoporous carbon (OMC) has been identified as an ideal adsorbent possessing high specific surface area and large pore volume to alleviate these pollutants. A novel ordered mesoporous carbon was prepared using COK-19 template with the cubic Fm3m structu…	Adsorptive removal of resorcinol on a novel ordered mesoporous carbon (OMC) employing COK-19 silica scaffold: Kinetics and equilibrium study <U+FFFD><U+FFFD> 2018 Phenolic compounds and their derivatives have been found in industrial wastewater, which pose threats to the natural environment. Ordered mesoporous carbon (OMC) has been identified as an ideal adsorbent possessing high specific surface…	A novel ordered mesoporous carbon was prepared using COK-19 template with the cubic Fm3m structure for the first time.	2-s2.0-85046677839	No		not about detections in aquatic environment
44	8096	Hu, Y., Li, D., Sun, F., Weng, Y., You, S., Shao, Y.	Temperature-induced phase changes in bismuth oxides and efficient photodegradation of phenol and p-chlorophenol	2016	Journal of Hazardous Materials	301	NA	NA	362	370	NA	24	10.1016/j.jhazmat.2015.09.008	https://www.scopus.com/inward/record.url?eid=2-s2.0-84942154895&partnerID=40&md5=238595ea1ccf094e3fafa05aa70ebd8d	Article	NA	Scopus	Â© 2015 Elsevier B.V. A novel, simple and efficient approach for photodegrading phenol and p-chlorophenol, based on BixOy, was reported for the first time. Monoclinic Bi2O4 was prepared by the hydrothermal treatment of NaBiO3Â·2H2O. A series of interesting phase transitions happened and various bismuth oxides (Bi4O7, Î²-Bi2O3 and Î±-Bi2O3) were obtained by sintering Bi2O4 at different temperature…	Temperature-induced phase changes in bismuth oxides and efficient photodegradation of phenol and p-chlorophenol <U+FFFD><U+FFFD> 2015 Elsevier B.V. A novel, simple and efficient approach for photodegrading phenol and p-chlorophenol, based on BixOy, was reported for the first time. Monoclinic Bi2O4 was prepared by the hydrothermal treatment of NaBiO3<U+FFFD><U+FFFD>2H2O. A series of interesting ph…	A novel, simple and efficient approach for photodegrading phenol and p-chlorophenol, based on BixOy, was reported for the first time.	2-s2.0-84942154895	No		not about detections in aquatic environment
1239	20320	Huys, R.	Harpacticoid copepods - Their symbiotic associations and biogenic substrata: A review	2016	Zootaxa	4174	1	NA	448	729	NA	8	10.11646/zootaxa.4174.1.28	https://www.scopus.com/inward/record.url?eid=2-s2.0-84991065643&partnerID=40&md5=e4d2e4d165fd93f5f62748be41bcd37d	Review	NA	Scopus	Ã¯Â¿Â½ 2016 Magnolia Press. Members of the order Harpacticoida are primarily free-living and benthic but some lineages have adopted alternative modes of life which involve a major habitat shift or dependence on a host. Since the first discovery of a harpacticoid as-sociated with an invertebrate host about 150 years ago, a total of 172 species, representing 84 genera and 17 families, have been sho…	Harpacticoid copepods - Their symbiotic associations and biogenic substrata: A review <U+FFFD><U+FFFD><U+FFFD><U+FFFD><U+FFFD><U+FFFD> 2016 Magnolia Press. Members of the order Harpacticoida are primarily free-living and benthic but some lineages have adopted alternative modes of life which involve a major habitat shift or dependence on a host. Since the first discovery of a harpacticoid as-socia…	A number of new names are proposed for species that had previously been misidentified: Diarthrodes septemtrionalis sp. nov. for D. roscoffensis (Monard, 1935b) sensu Kornev & Chertoprud (2008), Kioloaria jejuensis sp. nov. for Porcel-lidium brevicaudatum Thompson & Scott, 1903 sensu Kim & Kim (1996), Xouthous andamanensis sp. nov. for X. mal-divae [sic] Sewell, 1940 sensu Wells & Rao (1987), X. w…	2-s2.0-84991065643	No		not about detections in aquatic environment
276	8704	Tweed, S., Munksgaard, N., Marc, V., Rockett, N., Bass, A., Forsythe, A.J., Bird, M.I., Leblanc, M.	Continuous monitoring of stream Î´<sup>18</sup>O and Î´<sup>2</sup>H and stormflow hydrograph separation using laser spectrometry in an agricultural catchment	2016	Hydrological Processes	30	4	NA	648	660	NA	9	10.1002/hyp.10689	https://www.scopus.com/inward/record.url?eid=2-s2.0-84956572857&partnerID=40&md5=4bbe3407e511194ad6a9754c3f4f3584	Article	NA	Scopus	Â© 2016 John Wiley & Sons, Ltd. A portable Wavelength Scanned-Cavity Ring-Down Spectrometer (Picarro L2120) fitted with a diffusion sampler (DS-CRDS) was used for the first time to continuously measure Î´18O and Î´2H of stream water. The experiment took place during a storm event in a wet tropical agricultural catchment in north-eastern Australia. At a temporal resolution of one minute, the DS-CR…	Continuous monitoring of stream <U+FFFD><U+FFFD><sup>18</sup>O and <U+FFFD><U+FFFD><sup>2</sup>H and stormflow hydrograph separation using laser spectrometry in an agricultural catchment <U+FFFD><U+FFFD> 2016 John Wiley & Sons, Ltd. A portable Wavelength Scanned-Cavity Ring-Down Spectrometer (Picarro L2120) fitted with a diffusion sampler (DS-CRDS) was used for the first time to continuously meas…	A portable Wavelength Scanned-Cavity Ring-Down Spectrometer (Picarro L2120) fitted with a diffusion sampler (DS-CRDS) was used for the first time to continuously measure <U+FFFD><U+FFFD>18O and <U+FFFD><U+FFFD>2H of stream water.	2-s2.0-84956572857	No		new identificaiton method
2048	2353	Novillo, O., Pertusa, J.F., TomÃ¡s, J.	Exploring the presence of pollutants at sea: Monitoring heavy metals and pesticides in loggerhead turtles (Caretta caretta) from the western Mediterranean	2017	Science of the Total Environment	598	NA	NA	1130	1139	NA	6	10.1016/j.scitotenv.2017.04.090	https://www.scopus.com/inward/record.url?eid=2-s2.0-85018396379&partnerID=40&md5=ab9b244cdcf1844b34043c8e7b57dbcf	Article	NA	Scopus	Â© 2017 Elsevier B.V. Marine turtles are considered good sentinel species for environmental assessment because of their long lifespan, feeding ecology, habitat use and migratory nature. In the present study, we assessed presence of cadmium, lead and mercury, together with organic pollutants, both in fat and muscle tissue of 25 stranded loggerhead turtles (Caretta caretta) stranded along the Valen…	Exploring the presence of pollutants at sea: Monitoring heavy metals and pesticides in loggerhead turtles (Caretta caretta) from the western Mediterranean <U+FFFD><U+FFFD> 2017 Elsevier B.V. Marine turtles are considered good sentinel species for environmental assessment because of their long lifespan, feeding ecology, habitat use and migratory nature. In the present study, we assessed presence o…	A preliminary non-targeted analysis (using time-of-flight (TOF) technology), made for the first time in marine turtles, allowed to detect 39 different pesticides, most of them previously undetected in this species.	2-s2.0-85018396379	No	CH	new marine
1648	17117	Xu, L., Liang, G., Yin, M.	A promising electrode material modified by Nb-doped TiO<inf>2</inf>nanotubes for electrochemical degradation of AR 73	2017	Chemosphere	173	NA	NA	425	434	NA	5	10.1016/j.chemosphere.2017.01.077	https://www.scopus.com/inward/record.url?eid=2-s2.0-85010403608&partnerID=40&md5=f176e790eadec60107dce6bd63d9fd94	Article	NA	Scopus	Â© 2017 Elsevier Ltd A distinctive SnO2[sbnd]Sb electrode with highly ordered Nb doped TiO2nanotubes sheet as a new substrate, obtained by Nb[sbnd]Ti alloy anodization, is prepared by pulse electrochemical deposition for the first time as electrocatalytic oxidation anode for wastewater treatment. The novel electrode has a larger surface area and smaller crystallite particles than conventional SnO…	A promising electrode material modified by Nb-doped TiO<inf>2</inf>nanotubes for electrochemical degradation of AR 73 <U+FFFD><U+FFFD> 2017 Elsevier Ltd A distinctive SnO2[sbnd]Sb electrode with highly ordered Nb doped TiO2nanotubes sheet as a new substrate, obtained by Nb[sbnd]Ti alloy anodization, is prepared by pulse electrochemical deposition for the first time as electrocatalytic oxidation a…	A promising electrode material modified by Nb-doped TiO<inf>2</inf>nanotubes for electrochemical degradation of AR 73 <U+FFFD><U+FFFD> 2017 Elsevier Ltd A distinctive SnO2[sbnd]Sb electrode with highly ordered Nb doped TiO2nanotubes sheet as a new substrate, obtained by Nb[sbnd]Ti alloy anodization, is prepared by pulse electrochemical deposition for the first time as electrocatalytic oxidation a…	2-s2.0-85010403608	No		not about detections in aquatic environment
3256	11068	Lemons, B., Khaing, H., Ward, A., Thakur, P.	A rapid method for the sequential separation of polonium, plutonium, americium and uranium in drinking water	2018	Applied Radiation and Isotopes	136	NA	NA	10	17	NA	NA	10.1016/j.apradiso.2018.02.008	https://www.scopus.com/inward/record.url?eid=2-s2.0-85041799874&partnerID=40&md5=0b6f27217fc583e5c6d7ea206c80a9ab	Article	NA	Scopus	Â© 2018 Elsevier Ltd A new sequential separation method for the determination of polonium and actinides (Pu, Am and U) in drinking water samples has been developed that can be used for emergency response or routine water analyses. For the first time, the application of TEVA chromatography column in the sequential separation of polonium and plutonium has been studied. This method utilizes a rapid …	A rapid method for the sequential separation of polonium, plutonium, americium and uranium in drinking water <U+FFFD><U+FFFD> 2018 Elsevier Ltd A new sequential separation method for the determination of polonium and actinides (Pu, Am and U) in drinking water samples has been developed that can be used for emergency response or routine water analyses. For the first time, the application of TEVA c…	A rapid method for the sequential separation of polonium, plutonium, americium and uranium in drinking water <U+FFFD><U+FFFD> 2018 Elsevier Ltd A new sequential separation method for the determination of polonium and actinides (Pu, Am and U) in drinking water samples has been developed that can be used for emergency response or routine water analyses.	2-s2.0-85041799874	No		not about detections in aquatic environment
3338	12609	Li, R., Chen, Z., Dong, F., Xu, J., Liu, X., Wu, X., Pan, X., Tao, Y., Zheng, Y.	Supercritical fluid chromatographic-tandem mass spectrometry method for monitoring dissipation of thiacloprid in greenhouse vegetables and soil under different application modes	2018	Journal of Chromatography B: Analytical Technologies in the Biomedical and Life Sciences	1081-1082	NA	NA	25	32	NA	2	10.1016/j.jchromb.2018.02.021	https://www.scopus.com/inward/record.url?eid=2-s2.0-85042640921&partnerID=40&md5=c89a43677d56a07c6b6a1a53f37b6509	Article	NA	Scopus	Â© 2018 Elsevier B.V. A rapid, sensitive and effective supercritical fluid chromatographic-tandem mass spectrometry (SFC-MS/MS) method was developed to analyze thiacloprid for the first time. The SFC-MS/MS conditions were optimized with the ultra-performance convergence chromatography (UPC2) BEH column (100 mm Ã— 3.0 mm, 1.7 Î¼m particle size) and thiacloprid was eluted at 1.22 min in gradient mo…	Supercritical fluid chromatographic-tandem mass spectrometry method for monitoring dissipation of thiacloprid in greenhouse vegetables and soil under different application modes <U+FFFD><U+FFFD> 2018 Elsevier B.V. A rapid, sensitive and effective supercritical fluid chromatographic-tandem mass spectrometry (SFC-MS/MS) method was developed to analyze thiacloprid for the first time. The SFC-MS/MS c…	A rapid, sensitive and effective supercritical fluid chromatographic-tandem mass spectrometry (SFC-MS/MS) method was developed to analyze thiacloprid for the first time.	2-s2.0-85042640921	No		not about detections in aquatic environment
1331	19565	Wang, C., Wang, J., Li, M., Qu, X., Zhang, K., Rong, Z., Xiao, R., Wang, S.	A rapid SERS method for label-free bacteria detection using polyethylenimine-modified Au-coated magnetic microspheres and Au@Ag nanoparticles	2016	Analyst	141	22	NA	6226	6238	NA	17	10.1039/c6an01105e	https://www.scopus.com/inward/record.url?eid=2-s2.0-84994128665&partnerID=40&md5=f28ab607eea45bb558f4bb62526d73d6	Article	NA	Scopus	Â© The Royal Society of Chemistry 2016. A rapid, sensitive, and label-free SERS detection method for bacteria pathogens is reported for the first time. The method, which is based on the combination of polyethylenimine (PEI)-modified Au-coated magnetic microspheres (Fe3O4@Au@PEI) and concentrated Au@Ag nanoparticles (NPs), was named the capture-enrichment-enhancement (CEE) three-step method. A nov…	A rapid SERS method for label-free bacteria detection using polyethylenimine-modified Au-coated magnetic microspheres and Au@Ag nanoparticles <U+FFFD><U+FFFD> The Royal Society of Chemistry 2016. A rapid, sensitive, and label-free SERS detection method for bacteria pathogens is reported for the first time. The method, which is based on the combination of polyethylenimine (PEI)-modified Au-coated …	A rapid, sensitive, and label-free SERS detection method for bacteria pathogens is reported for the first time.	2-s2.0-84994128665	No		new identificaiton method
1480	14099	Cuellar-Bermudez, S.P., Aleman-Nava, G.S., Chandra, R., Garcia-Perez, J.S., Contreras-Angulo, J.R., Markou, G., Muylaert, K., Rittmann, B.E., Parra-Saldivar, R.	Nutrients utilization and contaminants removal. A review of two approaches of algae and cyanobacteria in wastewater	2017	Algal Research	24	NA	NA	438	449	NA	16	10.1016/j.algal.2016.08.018	https://www.scopus.com/inward/record.url?eid=2-s2.0-85003918731&partnerID=40&md5=0e64a0462197bc7e068b83784a10cd2f	Article	NA	Scopus	Â© 2016 Elsevier B.V.The detection of new pollutants, stricter environmental regulations, and advancements in treatment technologies are driving improvements in bioprocesses for treating wastewater. Specifically, special concern is being placed on phosphorus and nitrogen forms, which spur eutrophication of water bodies, and emerging micropollutants such as pharmaceuticals and person-care products…	Nutrients utilization and contaminants removal. A review of two approaches of algae and cyanobacteria in wastewater <U+FFFD><U+FFFD> 2016 Elsevier B.V.The detection of new pollutants, stricter environmental regulations, and advancements in treatment technologies are driving improvements in bioprocesses for treating wastewater. Specifically, special concern is being placed on phosphorus and nitrog…	A review of two approaches of algae and cyanobacteria in wastewater <U+FFFD><U+FFFD> 2016 Elsevier B.V.The detection of new pollutants, stricter environmental regulations, and advancements in treatment technologies are driving improvements in bioprocesses for treating wastewater.	2-s2.0-85003918731	No		not about detections in aquatic environment
1440	2769	Guzman-Zavaleta, Z.J., Feregrino-Uribe, C., Morales-Sandoval, M., Menendez-Ortiz, A.	A robust and low-cost video fingerprint extraction method for copy detection	2017	Multimedia Tools and Applications	76	22	NA	24143	24163	NA	NA	10.1007/s11042-016-4168-6	https://www.scopus.com/inward/record.url?eid=2-s2.0-85000786921&partnerID=40&md5=82c5334b71d6f1bab6a804e14963b4e1	Article	NA	Scopus	Â© 2016, Springer Science+Business Media New York.Video fingerprinting for content-based video identification is a very useful task for the management and monetization of copyrighted content distribution. The main challenges of monitoring and copy detection systems are: a) the effective identification of highly transformed videos (robustness) and b) computational efficiency which may be relevant …	A robust and low-cost video fingerprint extraction method for copy detection <U+FFFD><U+FFFD> 2016, Springer Science+Business Media New York.Video fingerprinting for content-based video identification is a very useful task for the management and monetization of copyrighted content distribution. The main challenges of monitoring and copy detection systems are: a) the effective identification of hi…	A robust and low-cost video fingerprint extraction method for copy detection <U+FFFD><U+FFFD> 2016, Springer Science+Business Media New York.	2-s2.0-85000786921	No		not about detections in aquatic environment
3395	10082	Gomes, I.B., Lemos, M., Mathieu, L., SimÃµes, M., SimÃµes, L.C.	The action of chemical and mechanical stresses on single and dual species biofilm removal of drinking water bacteria	2018	Science of the Total Environment	631-632	NA	NA	987	993	NA	1	10.1016/j.scitotenv.2018.03.042	https://www.scopus.com/inward/record.url?eid=2-s2.0-85043525260&partnerID=40&md5=9050316cb6bfa57e88430260cff1177b	Article	NA	Scopus	Â© 2018 Elsevier B.V. The presence of biofilms in drinking water distribution systems (DWDS) is a global public health concern as they can harbor pathogenic microorganisms. Sodium hypochlorite (NaOCl) is the most commonly used disinfectant for microbial growth control in DWDS. However, its effect on biofilm removal is still unclear. This work aims to evaluate the effects of the combination of che…	The action of chemical and mechanical stresses on single and dual species biofilm removal of drinking water bacteria <U+FFFD><U+FFFD> 2018 Elsevier B.V. The presence of biofilms in drinking water distribution systems (DWDS) is a global public health concern as they can harbor pathogenic microorganisms. Sodium hypochlorite (NaOCl) is the most commonly used disinfectant for microbial growth control…	A rotating cylinder reactor was successfully used for the first time in drinking water biofilm studies with polyvinyl chloride as substratum.	2-s2.0-85043525260	No		new identificaiton method
1009	16527	GonÃ§alves, A.C., Capelo, J.L., Lodeiro, C., Santos, A.A.D.	A seleno-pyrene selective probe for Hg<sup>2+</sup>detection in either aqueous or aprotic systems	2017	Sensors and Actuators, B: Chemical	239	NA	NA	311	318	NA	7	10.1016/j.snb.2016.08.014	https://www.scopus.com/inward/record.url?eid=2-s2.0-84980683078&partnerID=40&md5=76ecd5f8fc527fbbd6b2f86cc9ea5837	Article	NA	Scopus	Â© 2016 A new fluorescent molecular probe (compound 7) assembled from the amide bond between the 1-pyrenecarboxylic acid (6) and 2-(butylselenyl)ethanamine (5) was designed, synthesized and its structure accurately characterized. The photophysical properties of 7 were evaluated among a wide range of metallic cations (Na+, K+, Ca2+, Co2+, Ni2+, Cu2+, Zn2+, Cd2+, Pb2+, Hg2+, Ag+, Al3+, Fe3+, Ga3+an…	A seleno-pyrene selective probe for Hg<sup>2+</sup>detection in either aqueous or aprotic systems <U+FFFD><U+FFFD> 2016 A new fluorescent molecular probe (compound 7) assembled from the amide bond between the 1-pyrenecarboxylic acid (6) and 2-(butylselenyl)ethanamine (5) was designed, synthesized and its structure accurately characterized. The photophysical properties of 7 were evaluated among a …	A seleno-pyrene selective probe for Hg<sup>2+</sup>detection in either aqueous or aprotic systems <U+FFFD><U+FFFD> 2016 A new fluorescent molecular probe (compound 7) assembled from the amide bond between the 1-pyrenecarboxylic acid (6) and 2-(butylselenyl)ethanamine (5) was designed, synthesized and its structure accurately characterized.	2-s2.0-84980683078	No		not about detections in aquatic environment
2202	4374	Afsharikia, A., Dehghani, M.R., Rezaei, M.	Preparation of vanadium-based perovskite by the effective method of microemulsion on enhanced surface area and activity: Environmental applications	2017	Materials Chemistry and Physics	196	NA	NA	177	185	NA	NA	10.1016/j.matchemphys.2017.04.060	https://www.scopus.com/inward/record.url?eid=2-s2.0-85019897695&partnerID=40&md5=047ff0b70949f2f918764060b3c391e5	Article	NA	Scopus	Â© 2017 Elsevier B.V. A series of perovskite-type oxides LaMnxV1-xO3Â±Î´ was prepared via microemulsion method using conductivity experiment and triangular diagrams for the first time. The prepared nanoparticles were utilized in methane catalytic combustion. In order to check the structure of nanoparticles, they were characterized by XRD, SEM, BET and H2-TPR techniques. The results showed that th…	Preparation of vanadium-based perovskite by the effective method of microemulsion on enhanced surface area and activity: Environmental applications <U+FFFD><U+FFFD> 2017 Elsevier B.V. A series of perovskite-type oxides LaMnxV1-xO3<U+FFFD><U+FFFD><U+FFFD><U+FFFD> was prepared via microemulsion method using conductivity experiment and triangular diagrams for the first time. The prepared nanoparticl…	A series of perovskite-type oxides LaMnxV1-xO3<U+FFFD><U+FFFD><U+FFFD><U+FFFD> was prepared via microemulsion method using conductivity experiment and triangular diagrams for the first time.	2-s2.0-85019897695	No		not about detections in aquatic environment
584	8864	Tian, F., Zhu, R., Song, K., Ouyang, F., Cao, G.	Synergistic Photocatalytic Degradation of Phenol Using Precious Metal Supported Titanium Dioxide with Hydrogen Peroxide	2016	Environmental Engineering Science	33	3	NA	185	192	NA	4	10.1089/ees.2014.0153	https://www.scopus.com/inward/record.url?eid=2-s2.0-84962613828&partnerID=40&md5=7551fc5a811486dd9789adc8f84e7d3b	Article	NA	Scopus	Â© Copyright 2016, Mary Ann Liebert, Inc. A series of precious metal catalysts (M/titanium dioxide [TiO 2 ], M = Ru, Rh, Pd, Ag, Ir, Pt, or Au) were prepared by a light deposition method, and for the first time, synergistic effects of photocatalytic degradation of phenol (20 mg/L) under UV irradiation (365 nm) by M/TiO 2 with electron capture agent hydrogen peroxide (H 2 O 2) have been investigat…	Synergistic Photocatalytic Degradation of Phenol Using Precious Metal Supported Titanium Dioxide with Hydrogen Peroxide <U+FFFD><U+FFFD> Copyright 2016, Mary Ann Liebert, Inc. A series of precious metal catalysts (M/titanium dioxide [TiO 2 ], M = Ru, Rh, Pd, Ag, Ir, Pt, or Au) were prepared by a light deposition method, and for the first time, synergistic effects of photocatalytic degradation of …	A series of precious metal catalysts (M/titanium dioxide [TiO 2 ], M = Ru, Rh, Pd, Ag, Ir, Pt, or Au) were prepared by a light deposition method, and for the first time, synergistic effects of photocatalytic degradation of phenol (20 mg/L) under UV irradiation (365 nm) by M/TiO 2 with electron capture agent hydrogen peroxide (H 2 O 2) have been investigated.	2-s2.0-84962613828	No		not about detections in aquatic environment
571	6775	Rumyantsev, V.A., Pozdnyakov, S.R., Kryukov, L.N.	The influence of solâ€“gel processes in the Lake Ladoga Basin on the medicalâ€“environmental situation in the territories of the catchment basin of the lake	2016	Herald of the Russian Academy of Sciences	86	1	NA	34	38	NA	NA	10.1134/S1019331616010032	https://www.scopus.com/inward/record.url?eid=2-s2.0-84962428246&partnerID=40&md5=923896b37f108a9dde4033e5e2c57024	Article	NA	Scopus	Â© 2016, Pleiades Publishing, Ltd. This article contains the experimental results of studying the dynamics of solâ€“gel processes in freshwater bodies of the Lake Ladoga basin. A set of specific profiles of the distribution of potentially hazardous nanoparticles and nanosized metal associates in water ecosystems of the Ladoga basin was obtained for the first time with account for standards on the…	The influence of sol<U+FFFD><U+FFFD><U+FFFD>gel processes in the Lake Ladoga Basin on the medical<U+FFFD><U+FFFD><U+FFFD>environmental situation in the territories of the catchment basin of the lake <U+FFFD><U+FFFD> 2016, Pleiades Publishing, Ltd. This article contains the experimental results of studying the dynamics of sol<U+FFFD><U+FFFD><U+FFFD>gel processes in freshwater bodies of the Lake La…	A set of specific profiles of the distribution of potentially hazardous nanoparticles and nanosized metal associates in water ecosystems of the Ladoga basin was obtained for the first time with account for standards on the content of metals in surface waters, the geochemical traits of the catchment basin territories, and hydrodynamic and seasonal changes.	2-s2.0-84962428246	No		not first detection
75	8536	Rinklebe, J., AntiÄ‡-MladenoviÄ‡, S., Frohne, T., StÃ¤rk, H.-J., TomiÄ‡, Z., LiÄina, V.	Nickel in a serpentine-enriched Fluvisol: Redox affected dynamics and binding forms	2016	Geoderma	263	NA	NA	203	214	NA	21	10.1016/j.geoderma.2015.09.004	https://www.scopus.com/inward/record.url?eid=2-s2.0-84945556555&partnerID=40&md5=8ec5ec2e171ca332837e5cfd22423a7e	Article	NA	Scopus	Â© 2015 Elsevier B.V..We determined redox-induced (im)mobilization of geogenic nickel (Ni) as well as binding forms of Ni in a Fluvisol at the River Velika Morava valley (Serbia), enriched with serpentine minerals. The selected site is representative for intensive agricultural land use in the area and susceptible to dynamic redox conditions due to periodical flooding. A seven-step sequential extr…	Nickel in a serpentine-enriched Fluvisol: Redox affected dynamics and binding forms <U+FFFD><U+FFFD> 2015 Elsevier B.V..We determined redox-induced (im)mobilization of geogenic nickel (Ni) as well as binding forms of Ni in a Fluvisol at the River Velika Morava valley (Serbia), enriched with serpentine minerals. The selected site is representative for intensive agricultural land use in the area an…	A seven-step sequential extraction, grain-size and light-liquid separation as well as mineralogical analyses were used, first, to assess binding forms of Ni and second, to determine relationships between grain-size fractions, abundance of heavy density minerals, and Ni concentration in the bulk soil.	2-s2.0-84945556555	No		not about detections in aquatic environment
387	6579	Chang, C.-H., Wei, C.-C., Lin, L.-H., Tu, T.-H., Liao, V.H.-C.	Humic acids enhance the microbially mediated release of sedimentary ferrous iron	2016	Environmental Science and Pollution Research	23	5	NA	4176	4184	NA	2	10.1007/s11356-015-4703-4	https://www.scopus.com/inward/record.url?eid=2-s2.0-84959136120&partnerID=40&md5=270b4cbb3868284c96e5b21e2161a44c	Article	NA	Scopus	Â© 2015, Springer-Verlag Berlin Heidelberg. Iron (Fe) is an essential element for many organisms, but high concentrations of iron can be toxic. The complex relation between iron, arsenic (As), bacteria, and organic matter in sediments and groundwater is still an issue of environmental concern. The present study addresses the effects of humic acids and microorganisms on the mobilization of iron in…	Humic acids enhance the microbially mediated release of sedimentary ferrous iron <U+FFFD><U+FFFD> 2015, Springer-Verlag Berlin Heidelberg. Iron (Fe) is an essential element for many organisms, but high concentrations of iron can be toxic. The complex relation between iron, arsenic (As), bacteria, and organic matter in sediments and groundwater is still an issue of environmental concern. The prese…	A significant increase in the soluble Fe(II) concentrations occurred in the aqueous phases of the samples during the first 2 weeks, and aqueous Fe(II) reached its maximum concentrations after 8 weeks at the following Fe(II) concentrations: 28.95 <U+FFFD><U+FFFD> 1.16 mg/L (original non-sterilized sediments), 32.50 <U+FFFD><U+FFFD> 0.71 mg/L (50 mg/L humic acid-amended, non-sterilized sediments), …	2-s2.0-84959136120	No		not about detections in aquatic environment
171	5911	Chen, Y., Cheng, X., Mo, F., Huang, L., Wu, Z., Wu, Y., Xu, L., Fu, F.	Ultra-sensitive speciation analysis of mercury by CE-ICP-MS together with field-amplified sample stacking injection and dispersive solid-phase extraction	2016	Electrophoresis	37	43319	NA	1055	1062	NA	9	10.1002/elps.201500460	https://www.scopus.com/inward/record.url?eid=2-s2.0-84952674004&partnerID=40&md5=ee06f4b43ea71445565780e65cafc36b	Article	NA	Scopus	Â© 2016 WILEY-VCH Verlag GmbH & Co. KGaA, Weinheim. A simple dispersive solid-phase extraction (DSPE) used to extract and preconcentrate ultra-trace MeHg, EtHg and Hg2+ from water sample, and a sensitive method for the simultaneous analysis of MeHg, EtHg and Hg2+ by using capillary electrophoresis-inductively coupled plasma mass spectrometry (CE-ICP-MS) with field-amplified sample stacking inject…	Ultra-sensitive speciation analysis of mercury by CE-ICP-MS together with field-amplified sample stacking injection and dispersive solid-phase extraction <U+FFFD><U+FFFD> 2016 WILEY-VCH Verlag GmbH & Co. KGaA, Weinheim. A simple dispersive solid-phase extraction (DSPE) used to extract and preconcentrate ultra-trace MeHg, EtHg and Hg2+ from water sample, and a sensitive method for the simultaneous…	A simple dispersive solid-phase extraction (DSPE) used to extract and preconcentrate ultra-trace MeHg, EtHg and Hg2+ from water sample, and a sensitive method for the simultaneous analysis of MeHg, EtHg and Hg2+ by using capillary electrophoresis-inductively coupled plasma mass spectrometry (CE-ICP-MS) with field-amplified sample stacking injection (FASI) were first reported in this study.	2-s2.0-84952674004	no		new identificaiton method
1397	6708	Konkayan, M., Limchoowong, N., Sricharoen, P., Chanthai, S.	A highly sensitive and selective method for the determination of an iodate in table-salt samples using malachite green-based spectrophotometry	2016	Analytical Sciences	32	11	NA	1231	1236	NA	3	10.2116/analsci.32.1231	https://www.scopus.com/inward/record.url?eid=2-s2.0-84995921506&partnerID=40&md5=0aed5f3c9f2fa4b74a8223c9074482fd	Article	NA	Scopus	Â© Japan Society for Analytical Chemistry. A simple, rapid, and sensitive malachite green-based spectrophotometric method for the selective trace determination of an iodate has been developed and presented for the first time. The reaction mixture was specifically involved in the liberation of iodine in the presence of an excess of iodide in an acidic condition following an instantaneous reaction …	A highly sensitive and selective method for the determination of an iodate in table-salt samples using malachite green-based spectrophotometry <U+FFFD><U+FFFD> Japan Society for Analytical Chemistry. A simple, rapid, and sensitive malachite green-based spectrophotometric method for the selective trace determination of an iodate has been developed and presented for the first time. The reaction mix…	A simple, rapid, and sensitive malachite green-based spectrophotometric method for the selective trace determination of an iodate has been developed and presented for the first time.	2-s2.0-84995921506	No		new identificaiton method
3720	9696	Escuder-Gilabert, L., MartÃ­n-Biosca, Y., Perez-Baeza, M., Sagrado, S., Medina-HernÃ¡ndez, M.J.	Trimeprazine is enantioselectively degraded by an activated sludge in ready biodegradability test conditions	2018	Water Research	141	NA	NA	57	64	NA	NA	10.1016/j.watres.2018.05.008	https://www.scopus.com/inward/record.url?eid=2-s2.0-85047978678&partnerID=40&md5=ee8a16ea1c13d666bdcca71e5cef98a3	Article	NA	Scopus	Â© 2018 Elsevier Ltd A great number of available pharmaceuticals are chiral compounds. Although they are usually manufactured as racemic mixtures, they can be enantioselectively biodegraded as a result of microbial processes. In this paper, a biodegradability assay in similar conditions to those recommended in OECD tests of enantiomers of trimeprazine (a phenothiazine employed as a racemate) is c…	Trimeprazine is enantioselectively degraded by an activated sludge in ready biodegradability test conditions <U+FFFD><U+FFFD> 2018 Elsevier Ltd A great number of available pharmaceuticals are chiral compounds. Although they are usually manufactured as racemic mixtures, they can be enantioselectively biodegraded as a result of microbial processes. In this paper, a biodegradability assay in similar…	A simplified Monod equation was used as a curve fitting approach for concentration (S), biodegradation (BD), and for the first time, EF experimental data in order to expand the usefulness of the results.	2-s2.0-85047978678	No		not about detections in aquatic environment
127	5218	Wang, L., Li, B., Xu, F., Shi, X., Feng, D., Wei, D., Li, Y., Feng, Y., Wang, Y., Jia, D., Zhou, Y.	High-yield synthesis of strong photoluminescent N-doped carbon nanodots derived from hydrosoluble chitosan for mercury ion sensing via smartphone APP	2016	Biosensors and Bioelectronics	79	NA	NA	1	8	NA	34	10.1016/j.bios.2015.11.085	https://www.scopus.com/inward/record.url?eid=2-s2.0-84949515593&partnerID=40&md5=46d7443feab8ba4a3f1e1a7ea8899d30	Article	NA	Scopus	Â© 2015 Elsevier B.V. Photoluminescent carbon nanodots (CNDs) have offered considerable potential to be used in biomedical and environmental fields including live cell imaging and heavy metal ion detection due to their superior quantum emission efficiencies, ability to be functionalized using a variety of chemistries and apparent absence of toxicity. However, to date, synthetic yield of CNDs deri…	High-yield synthesis of strong photoluminescent N-doped carbon nanodots derived from hydrosoluble chitosan for mercury ion sensing via smartphone APP <U+FFFD><U+FFFD> 2015 Elsevier B.V. Photoluminescent carbon nanodots (CNDs) have offered considerable potential to be used in biomedical and environmental fields including live cell imaging and heavy metal ion detection due to their superior quantum…	A smartphone application (APP) based on N-doped CNDs was developed for the first time providing a portable and low cost detection platform for detection of Hg2+ and alert of heavy metal ions contamination.	2-s2.0-84949515593	No		not about detections in aquatic environment
2802	555	Dellinger, M.J., Olson, J., Clark, R., Pingatore, N., Ripley, M.P.	Development and pilot testing of a model to translate risk assessment data for Great Lakes Native American communities using mobile technology	2018	Human and Ecological Risk Assessment	24	1	NA	242	255	NA	NA	10.1080/10807039.2017.1377596	https://www.scopus.com/inward/record.url?eid=2-s2.0-85030851425&partnerID=40&md5=f6530acb82a0f5008c7f1d0dcff48caf	Article	NA	Scopus	Â© 2018 Taylor & Francis Group, LLC. The Chippewa Ottowa Resource Authority monitors fish contaminants in Anishinaabe (Great Lake Native American) tribal fisheries. A software program (app) was programmed to translate and operationalize these data for the first time in an interactive, personalized, and culturally tailored format. This article reports the process for creation, and preliminary comm…	Development and pilot testing of a model to translate risk assessment data for Great Lakes Native American communities using mobile technology <U+FFFD><U+FFFD> 2018 Taylor & Francis Group, LLC. The Chippewa Ottowa Resource Authority monitors fish contaminants in Anishinaabe (Great Lake Native American) tribal fisheries. A software program (app) was programmed to translate and operationalize these…	A software program (app) was programmed to translate and operationalize these data for the first time in an interactive, personalized, and culturally tailored format.	2-s2.0-85030851425	no		not about detections in aquatic environment
789	4869	Obbels, D., Verleyen, E., Mano, M.-J., Namsaraev, Z., Sweetlove, M., Tytgat, B., Fernandez-Carazo, R., De Wever, A., D'hondt, S., Ertz, D., Elster, J., Sabbe, K., Willems, A., Wilmotte, A., Vyverman, W.	Bacterial and eukaryotic biodiversity patterns in terrestrial and aquatic habitats in the SÃ¸r Rondane Mountains, Dronning Maud Land, East Antarctica	2016	FEMS Microbiology Ecology	92	6	NA	1	13	NA	4	10.1093/femsec/fiw041	https://www.scopus.com/inward/record.url?eid=2-s2.0-84973121786&partnerID=40&md5=0e234e37e620be55650a648006451c9b	Article	NA	Scopus	Â© FEMS 2016. The bacterial and microeukaryotic biodiversity were studied using pyrosequencing analysis on a 454 GS FLX+ platform of partial SSU rRNA genes in terrestrial and aquatic habitats of the Sor Rondane Mountains, including soils, on mosses, endolithic communities, cryoconite holes and supraglacial and subglacial meltwater lenses. This inventory was complemented with Denaturing Gradient G…	Bacterial and eukaryotic biodiversity patterns in terrestrial and aquatic habitats in the S<U+FFFD><U+FFFD>r Rondane Mountains, Dronning Maud Land, East Antarctica <U+FFFD><U+FFFD> FEMS 2016. The bacterial and microeukaryotic biodiversity were studied using pyrosequencing analysis on a 454 GS FLX+ platform of partial SSU rRNA genes in terrestrial and aquatic habitats of the Sor Rondane Mountains,…	A striking feature in all datasets was the detection of a relatively large amount of sequences new to science, which underscores the need for additional biodiversity assessments in Antarctic inland locations.	2-s2.0-84973121786	No		not about detections in aquatic environment
1790	539	Khan, M.B., Nisar, H., Ng, C.A., Lo, P.K., Yap, V.V.	Generalized classification modeling of activated sludge process based on microscopic image analysis	2018	Environmental Technology (United Kingdom)	39	1	NA	24	34	NA	2	10.1080/09593330.2017.1293166	https://www.scopus.com/inward/record.url?eid=2-s2.0-85013782746&partnerID=40&md5=90f188ff9967560343d6d7d25baffed4	Article	NA	Scopus	Â© 2017 Informa UK Limited, trading as Taylor & Francis Group. The state of activated sludge wastewater treatment process (AS WWTP) is conventionally identified by physico-chemical measurements which are costly, time-consuming and have associated environmental hazards. Image processing and analysis-based linear regression modeling has been used to monitor the AS WWTP. But it is plant- and state-s…	Generalized classification modeling of activated sludge process based on microscopic image analysis <U+FFFD><U+FFFD> 2017 Informa UK Limited, trading as Taylor & Francis Group. The state of activated sludge wastewater treatment process (AS WWTP) is conventionally identified by physico-chemical measurements which are costly, time-consuming and have associated environmental hazards. Image processin…	A support vector machine (SVM)-based state identification strategy was proposed with a new agreement solver module for imbalanced data of the states of AS plants.	2-s2.0-85013782746	No		not about detections in aquatic environment
832	4983	Pardos De La Gandara, M., Curry, M., Berger, J., Burstein, D., Della-Latta, P., Kopetz, V., Quale, J., Spitzer, E., Tan, R., Urban, C., Wang, G., Whittier, S., De Lencastre, H., Tomasz, A.	MRSA causing infections in hospitals in Greater Metropolitan New York: Major shift in the dominant clonal type between 1996 and 2014	2016	PLoS ONE	11	6	e0156924	NA	NA	NA	4	10.1371/journal.pone.0156924	https://www.scopus.com/inward/record.url?eid=2-s2.0-84974845979&partnerID=40&md5=90d057e49791e2a7b01385a82948ffe7	Article	Open Access	Scopus	Ã¯Â¿Â½ 2016 Pardos de la Gandara et al. This is an open access article distributed under the terms of the Creative Commons Attribution License, which permits unrestricted use, distribution, and reproduction in any medium, provided the original author and source are credited. A surveillance study in 1996 identified the USA100 clone (ST5/SCCmecII)-also known as the \New York/Japan\\ clone - as the …	MRSA causing infections in hospitals in Greater Metropolitan New York: Major shift in the dominant clonal type between 1996 and 2014 <U+FFFD><U+FFFD><U+FFFD><U+FFFD><U+FFFD><U+FFFD> 2016 Pardos de la Gandara et al. This is an open access article distributed under the terms of the Creative Commons Attribution License, which permits unrestricted use, distribution, and reproduction in any medium, pr…	A surveillance study in 1996 identified the USA100 clone (ST5/SCCmecII)-also known as the \New York/Japan\\ clone - as the most prevalent MRSA causing infections in 12 New York City hospitals."	2-s2.0-84974845979	No		not about detections in aquatic environment
39	7857	Salama, W., Anand, R.R., Verrall, M.	Mineral exploration and basement mapping in areas of deep transported cover using indicator heavy minerals and paleoredox fronts, Yilgarn Craton, Western Australia	2016	Ore Geology Reviews	72	P1	NA	485	509	NA	6	10.1016/j.oregeorev.2015.07.014	https://www.scopus.com/inward/record.url?eid=2-s2.0-84941299517&partnerID=40&md5=550690275a3cb47b731b2a9cf6445d16	Article	NA	Scopus	Â© 2015.Glacial sediments have been thoroughly integrated into mineral exploration protocols in the Northern hemisphere (e.g., Canada and Fennoscandia), but have received less attention in Australia. In Western Australia (WA), Permo-Carboniferous diamictites, buried by younger Cenozoic sediments, cover scattered areas that have potential to host gold and nickel mineralization, in the NE of the Yi…	Mineral exploration and basement mapping in areas of deep transported cover using indicator heavy minerals and paleoredox fronts, Yilgarn Craton, Western Australia <U+FFFD><U+FFFD> 2015.Glacial sediments have been thoroughly integrated into mineral exploration protocols in the Northern hemisphere (e.g., Canada and Fennoscandia), but have received less attention in Australia. In Western Australia …	A systematic stratigraphic, mineralogical and geochemical study was undertaken to determine whether diamictites in the Agnew-Lawlers gold province have properties that may help target concealed mineralization.	2-s2.0-84941299517	No		not about detections in aquatic environment
2780	3279	CaÃ±abate, Ã., GarcÃ­a-Ruiz, E., Resano, M., TodolÃ­, J.-L.	Cerebrospinal fluid elemental analysis by using a total sample consumption system operated at high temperature adapted to inductively coupled plasma mass spectrometry	2017	Journal of Analytical Atomic Spectrometry	32	10	NA	1916	1924	NA	1	10.1039/c7ja00210f	https://www.scopus.com/inward/record.url?eid=2-s2.0-85030687640&partnerID=40&md5=e23b8d9026ecf6d739e7b6e31284afaf	Article	NA	Scopus	Â© 2017 The Royal Society of Chemistry. A total consumption low sample introduction system has been applied for the first time to the multielement analysis of non-diluted cerebrospinal fluids (CSFs) by means of inductively coupled plasma mass spectrometry (ICP-MS). A 2.5 Î¼L sample volume has been injected into an air carrier stream in agreement with the air-segmented injection principle. The sam…	Cerebrospinal fluid elemental analysis by using a total sample consumption system operated at high temperature adapted to inductively coupled plasma mass spectrometry <U+FFFD><U+FFFD> 2017 The Royal Society of Chemistry. A total consumption low sample introduction system has been applied for the first time to the multielement analysis of non-diluted cerebrospinal fluids (CSFs) by means of inducti…	A total consumption low sample introduction system has been applied for the first time to the multielement analysis of non-diluted cerebrospinal fluids (CSFs) by means of inductively coupled plasma mass spectrometry (ICP-MS).	2-s2.0-85030687640	no		not about detections in aquatic environment
2026	7444	Prabhakar, G., Srinivas, P.	Morphometric analysis and prioritization of sub-watersheds of brahmani and baitarni basins using remote sensing and GIS, Keonjhar and Sundargarh districts, Odisha, India	2016	International Journal of Earth Sciences and Engineering	9	6	#02090626	2512	2522	NA	NA	NA	https://www.scopus.com/inward/record.url?eid=2-s2.0-85018200655&partnerID=40&md5=c03bc4750895758b59657d2c099d05c7	Article	NA	Scopus	Â© 2016 CAFET-INNOVA TECHNICAL SOCIETY. All rights reserved.In this study, morphometric analysis and prioritization of 12 sub-watersheds of Brahmani and Baitarni Basins, which are located in Keonjhar and Sundargarh Districts of Odisha State, India is carried out using Remote Sensing and GIS techniques. The morphometric parameters considered for analysis are stream order, stream length, bifurcatio…	Morphometric analysis and prioritization of sub-watersheds of brahmani and baitarni basins using remote sensing and GIS, Keonjhar and Sundargarh districts, Odisha, India <U+FFFD><U+FFFD> 2016 CAFET-INNOVA TECHNICAL SOCIETY. All rights reserved.In this study, morphometric analysis and prioritization of 12 sub-watersheds of Brahmani and Baitarni Basins, which are located in Keonjhar and Sundargarh …	A total number of 1654 streams were identified of which 1223 are first order streams, 320 are 2nd order, 77 are 3rd order, 20 are 4th order, 6 are 5th order, 4 are 6th order and 4 are of 7th order.	2-s2.0-85018200655	No		not about detections in aquatic environment
1693	17560	Panteleit, J., Keller, N.S., Kokko, H., Jussila, J., Makkonen, J., Theissinger, K., Schrimpf, A.	Investigation of ornamental crayfish reveals new carrier species of the crayfish plague pathogen (Aphanomyces astaci)	2017	Aquatic Invasions	12	1	NA	77	83	NA	2	10.3391/ai.2017.12.1.08	https://www.scopus.com/inward/record.url?eid=2-s2.0-85011841005&partnerID=40&md5=aeda0cd98d586864c1a68f578bb45830	Article	NA	Scopus	Â© 2017 The Author(s). Several North American crayfish species have so far been identified as carriers of the crayfish plague agent Aphanomyces astaci. The pathogen is responsible for the declines of thousands of European crayfish populations. Currently, one of the introduction pathways of North American crayfish species is the aquarium trade which may sometimes be followed by intentional release…	Investigation of ornamental crayfish reveals new carrier species of the crayfish plague pathogen (Aphanomyces astaci) <U+FFFD><U+FFFD> 2017 The Author(s). Several North American crayfish species have so far been identified as carriers of the crayfish plague agent Aphanomyces astaci. The pathogen is responsible for the declines of thousands of European crayfish populations. Currently, one of the i…	A total of 11 of the 85 analyzed crayfish individuals tested positive for an A. astaci infection, of which nine species are for the first time identified as carriers of A. astaci.	2-s2.0-85011841005	Yes	MB	new detection in biota
3380	12820	Kimura, S., Uehara, M., Morimoto, D., Yamanaka, M., Sako, Y., Yoshida, T.	Incomplete selective sweeps of Microcystis population detected by the leader-end CRISPR fragment analysis in a natural pond	2018	Frontiers in Microbiology	9	MAR	425	NA	NA	NA	NA	10.3389/fmicb.2018.00425	https://www.scopus.com/inward/record.url?eid=2-s2.0-85043351864&partnerID=40&md5=1ba7ab7a0d7dea160db82e618de44346	Article	Open Access	Scopus	Â© 2018 Kimura, Uehara, Morimoto, Yamanaka, Sako and Yoshida. The freshwater cyanobacterium Microcystis aeruginosa frequently forms toxic massive blooms and exists in an arms race with its infectious phages in aquatic natural environments, and as a result, has evolved extremely diverse and elaborate antiviral defense systems, including the clustered regularly interspaced short palindromic repeats…	Incomplete selective sweeps of Microcystis population detected by the leader-end CRISPR fragment analysis in a natural pond <U+FFFD><U+FFFD> 2018 Kimura, Uehara, Morimoto, Yamanaka, Sako and Yoshida. The freshwater cyanobacterium Microcystis aeruginosa frequently forms toxic massive blooms and exists in an arms race with its infectious phages in aquatic natural environments, and as a result, has …	A total of 463,954 high-quality leader-end CRISPR sequences were obtained and the sequences containing spacers were classified into 31 previously reported CTs and 68 new CTs based on the shared order of the leader-end spacers.	2-s2.0-85043351864	no		not about detections in aquatic environment
3827	9520	Zhang, K., Yong, F., McCarthy, D.T., Deletic, A.	Predicting long term removal of heavy metals from porous pavements for stormwater treatment	2018	Water Research	142	NA	NA	236	245	NA	NA	10.1016/j.watres.2018.05.038	https://www.scopus.com/inward/record.url?eid=2-s2.0-85049323393&partnerID=40&md5=c9016be2ce911c423c115e8e31b7c7ad	Article	NA	Scopus	Â© 2018 Elsevier Ltd Porous pavements are commonly used stormwater management systems. However, the understanding of their long-term capacity to retain heavy metals is limited. This study aims to investigate the long-term removal of heavy metals in three different porous pavements â€“ Porous Asphalt (PA), Hydrapave (HP) and Permapave (PP) over accelerated laboratory experiments representing 26 ye…	Predicting long term removal of heavy metals from porous pavements for stormwater treatment <U+FFFD><U+FFFD> 2018 Elsevier Ltd Porous pavements are commonly used stormwater management systems. However, the understanding of their long-term capacity to retain heavy metals is limited. This study aims to investigate the long-term removal of heavy metals in three different porous pavements <U+FFFD><U+…	A treatment model that simulates adsorption and desorption processes was developed for the first time to predict the long-term heavy metal removal by porous pavements.	2-s2.0-85049323393	No		not about detections in aquatic environment
3175	273	Cooper, K.B., Monje, R.R., MillÃ¡n, L., Lebsock, M., Tanelli, S., Siles, J.V., Lee, C., Brown, A.	Atmospheric Humidity Sounding Using Differential Absorption Radar Near 183 GHz	2018	IEEE Geoscience and Remote Sensing Letters	15	2	8246732	163	167	NA	NA	10.1109/LGRS.2017.2776078	https://www.scopus.com/inward/record.url?eid=2-s2.0-85040637054&partnerID=40&md5=eba5627b395b09ec7d6e9ae3fadc92d3	Article	NA	Scopus	Â© 2017 IEEE. A tunable G-band frequency-modulated continuous-wave radar system has been developed and used to perform differential absorption atmospheric humidity measurements for the first time. The radar's transmitter uses high-power-handling GaAs Schottky diodes to generate between 15-23 dBm over a 10-GHz bandwidth near 183 GHz. By virtue of a high-isolation circular polarization duplexer, th…	Atmospheric Humidity Sounding Using Differential Absorption Radar Near 183 GHz <U+FFFD><U+FFFD> 2017 IEEE. A tunable G-band frequency-modulated continuous-wave radar system has been developed and used to perform differential absorption atmospheric humidity measurements for the first time. The radar's transmitter uses high-power-handling GaAs Schottky diodes to generate between 15-23 dBm over a 10…	A tunable G-band frequency-modulated continuous-wave radar system has been developed and used to perform differential absorption atmospheric humidity measurements for the first time.	2-s2.0-85040637054	No		not about detections in aquatic environment
184	7488	Ghazaghi, M., Mousavi, H.Z., Rashidi, A.M., Shirkhanloo, H., Rahighi, R.	Innovative separation and preconcentration technique of coagulating homogenous dispersive micro solid phase extraction exploiting graphene oxide nanosheets	2016	Analytica Chimica Acta	902	NA	NA	33	42	NA	17	10.1016/j.aca.2015.11.011	https://www.scopus.com/inward/record.url?eid=2-s2.0-84952918765&partnerID=40&md5=b686b674e1db14b58ed9002acc089352	Article	NA	Scopus	Â© 2015 Elsevier B.V. A uniquely novel, fast, and facile technique is introduced for the first time in which a scant amount of graphene oxide (GO), without modification, has been utilized in dispersive mode of solid phase extraction (SPE) for an efficient yet simple separation. The proposed method of coagulating homogenous dispersive micro solid phase extraction (CHD-Î¼SPE) is based on coagulatio…	Innovative separation and preconcentration technique of coagulating homogenous dispersive micro solid phase extraction exploiting graphene oxide nanosheets <U+FFFD><U+FFFD> 2015 Elsevier B.V. A uniquely novel, fast, and facile technique is introduced for the first time in which a scant amount of graphene oxide (GO), without modification, has been utilized in dispersive mode of solid phase extract…	A uniquely novel, fast, and facile technique is introduced for the first time in which a scant amount of graphene oxide (GO), without modification, has been utilized in dispersive mode of solid phase extraction (SPE) for an efficient yet simple separation.	2-s2.0-84952918765	No		not about detections in aquatic environment
309	5377	Pal, P., Thakura, R., Chakrabortty, S.	Performance analysis and optimization of an advanced pharmaceutical wastewater treatment plant through a visual basic software tool (PWWT.VB)	2016	Environmental Science and Pollution Research	23	10	NA	9901	9917	NA	3	10.1007/s11356-016-6238-8	https://www.scopus.com/inward/record.url?eid=2-s2.0-84957575314&partnerID=40&md5=98dac89c011b2c9c06d409eae6ce107f	Article	NA	Scopus	Â© 2016, Springer-Verlag Berlin Heidelberg. A user-friendly, menu-driven simulation software tool has been developed for the first time to optimize and analyze the system performance of an advanced continuous membrane-integrated pharmaceutical wastewater treatment plant. The software allows pre-analysis and manipulation of input data which helps in optimization and shows the software performance …	Performance analysis and optimization of an advanced pharmaceutical wastewater treatment plant through a visual basic software tool (PWWT.VB) <U+FFFD><U+FFFD> 2016, Springer-Verlag Berlin Heidelberg. A user-friendly, menu-driven simulation software tool has been developed for the first time to optimize and analyze the system performance of an advanced continuous membrane-integrated pharmaceutical…	A user-friendly, menu-driven simulation software tool has been developed for the first time to optimize and analyze the system performance of an advanced continuous membrane-integrated pharmaceutical wastewater treatment plant.	2-s2.0-84957575314	No		not about detections in aquatic environment
889	6803	Brogat, M., Baures, E., Sellier, A., Mercier, F., Doloy, M., Thomas, O., Roig, B.	Automatic and predictive fractionation of organic micropollutants in contaminated water	2016	Environmental Chemistry	13	4	NA	688	698	NA	2	10.1071/EN15135	https://www.scopus.com/inward/record.url?eid=2-s2.0-84977269844&partnerID=40&md5=e3bb69512c80adc2ee9b606c0e2b781b	Article	NA	Scopus	Â© CSIRO 2016. Environmental context The safeguarding of water supplies and drinking water is a major issue when considering human health risk management. In this context, an automatic and on-site fractionation system for the detection of organic contaminants has been developed. The main goal of this system is to establish an initial diagnosis by identifying a class of substances involved in a ca…	Automatic and predictive fractionation of organic micropollutants in contaminated water <U+FFFD><U+FFFD> CSIRO 2016. Environmental context The safeguarding of water supplies and drinking water is a major issue when considering human health risk management. In this context, an automatic and on-site fractionation system for the detection of organic contaminants has been developed. The main goal of …	Abstract This paper proposes a new approach for the preconcentration, fractionation, prediction and detection of organic micropollutants in water.	2-s2.0-84977269844	No		not about detections in aquatic environment
911	18101	Kalpana, K., Selvaraj, V.	ZnS/SnS/Ag<inf>2</inf>S photocatalyst with enhanced photocatalytic activity under visible light illumination towards wastewater treatment	2017	Research on Chemical Intermediates	43	1	NA	423	435	NA	3	10.1007/s11164-016-2632-6	https://www.scopus.com/inward/record.url?eid=2-s2.0-84978174574&partnerID=40&md5=e34703b1aaa02c170264ff2944eef742	Article	NA	Scopus	Â© 2016, Springer Science+Business Media Dordrecht.Abstract: In this study, various compositions of ternary ZnS/SnS/Ag2S nanocatalysts were prepared for the first time through a wet chemical method. The as-prepared samples were characterized by UVâ€“DRS, PL and SEM analysis. The photocatalytic activities of the ZnS/SnS/Ag2S nanocatalysts were optimized for the photodecomposition of an aqueous sol…	ZnS/SnS/Ag<inf>2</inf>S photocatalyst with enhanced photocatalytic activity under visible light illumination towards wastewater treatment <U+FFFD><U+FFFD> 2016, Springer Science+Business Media Dordrecht.Abstract: In this study, various compositions of ternary ZnS/SnS/Ag2S nanocatalysts were prepared for the first time through a wet chemical method. The as-prepared samples were characterized by UV…	Abstract: In this study, various compositions of ternary ZnS/SnS/Ag2S nanocatalysts were prepared for the first time through a wet chemical method.	2-s2.0-84978174574	No		not about detections in aquatic environment
2754	2611	Bordbar, M., Noori-Ahmadabadi, J., Yeganeh-Faal, A., Alizadeh, R.	Application of Amine and Phosphotungstic Acid Groups as a Novel Bifunctional Fiber Coating in SPME-HPLC of Volatile Phenols in Water	2017	Chromatographia	80	11	NA	1605	1613	NA	NA	10.1007/s10337-017-3402-3	https://www.scopus.com/inward/record.url?eid=2-s2.0-85030328415&partnerID=40&md5=73bcfa8c1a5ad7e9443d455ea547c3ac	Article	NA	Scopus	Â© 2017, Springer-Verlag GmbH Germany. Abstract: The utilization of a bifunctional amine and H3PW12O40 (PW12) as a direct solid-phase microextraction (D-SPME) coating was investigated for the first time. The fiber was synthesized using positively charged 3-aminopropyltriethoxysilane as the crosslinking agent, and provided sites for the immobilization of PW12. Fourier transform infrared spectrosco…	Application of Amine and Phosphotungstic Acid Groups as a Novel Bifunctional Fiber Coating in SPME-HPLC of Volatile Phenols in Water <U+FFFD><U+FFFD> 2017, Springer-Verlag GmbH Germany. Abstract: The utilization of a bifunctional amine and H3PW12O40 (PW12) as a direct solid-phase microextraction (D-SPME) coating was investigated for the first time. The fiber was synthesized using positively charg…	Abstract: The utilization of a bifunctional amine and H3PW12O40 (PW12) as a direct solid-phase microextraction (D-SPME) coating was investigated for the first time.	2-s2.0-85030328415	no		not about detections in aquatic environment
558	2425	Koukina, S.E., Lobus, N.V., Peresypkin, V.I., Dara, O.M., Smurov, A.V.	Abundance, distribution and bioavailability of major and trace elements in surface sediments from the Cai River estuary and Nha Trang Bay (South China Sea, Vietnam)	2017	Estuarine, Coastal and Shelf Science	198	NA	NA	450	460	NA	9	10.1016/j.ecss.2016.03.005	https://www.scopus.com/inward/record.url?eid=2-s2.0-84962222813&partnerID=40&md5=9b3323bd85bfb2586da788b2d6634998	Article	NA	Scopus	Â© 2016 Elsevier Ltd Major (Si, Al, Fe, Ti, Mg, Ca, Na, K, S, P), minor (Mn) and trace (Li, V, Cr, Co, Ni, Cu, Zn, As, Sr, Zr, Mo, Cd, Ag, Sn, Sb, Cs, Ba, Hg, Pb, Bi and U) elements, their chemical forms and the mineral composition, organic matter (TOC) and carbonates (TIC) in surface sediments from the Cai River estuary and Nha Trang Bay were first determined along the salinity gradient. The abu…	Abundance, distribution and bioavailability of major and trace elements in surface sediments from the Cai River estuary and Nha Trang Bay (South China Sea, Vietnam) <U+FFFD><U+FFFD> 2016 Elsevier Ltd Major (Si, Al, Fe, Ti, Mg, Ca, Na, K, S, P), minor (Mn) and trace (Li, V, Cr, Co, Ni, Cu, Zn, As, Sr, Zr, Mo, Cd, Ag, Sn, Sb, Cs, Ba, Hg, Pb, Bi and U) elements, their chemical forms and the mineral …	Abundance, distribution and bioavailability of major and trace elements in surface sediments from the Cai River estuary and Nha Trang Bay (South China Sea, Vietnam) <U+FFFD><U+FFFD> 2016 Elsevier Ltd Major (Si, Al, Fe, Ti, Mg, Ca, Na, K, S, P), minor (Mn) and trace (Li, V, Cr, Co, Ni, Cu, Zn, As, Sr, Zr, Mo, Cd, Ag, Sn, Sb, Cs, Ba, Hg, Pb, Bi and U) elements, their chemical forms and the mineral …	2-s2.0-84962222813	No		not about detections in aquatic environment
3564	10899	Leal, D.A.G., Souza, D.S.M., Caumo, K.S., Fongaro, G., Panatieri, L.F., Durigan, M., Rott, M.B., Barardi, C.R.M., Franco, R.M.B.	Genotypic characterization and assessment of infectivity of human waterborne pathogens recovered from oysters and estuarine waters in Brazil	2018	Water Research	137	NA	NA	273	280	NA	NA	10.1016/j.watres.2018.03.024	https://www.scopus.com/inward/record.url?eid=2-s2.0-85046014560&partnerID=40&md5=6cd15076a914bb065833494ff8eb2bfd	Article	NA	Scopus	Â© 2018 Elsevier Ltd Waterborne, food-borne and sewage-borne pathogens are a major global concern, with the annual recurrence, most notably during the summer, of outbreaks of gastroenteritis of unconfirmed etiology associated with recreational activities in marine environments. The consumption of contaminated water-based foodstuffs is also related to outbreaks of human illness. The main goals of …	Genotypic characterization and assessment of infectivity of human waterborne pathogens recovered from oysters and estuarine waters in Brazil <U+FFFD><U+FFFD> 2018 Elsevier Ltd Waterborne, food-borne and sewage-borne pathogens are a major global concern, with the annual recurrence, most notably during the summer, of outbreaks of gastroenteritis of unconfirmed etiology associated with recreational …	Acanthamoeba specific genotypes were also identified for the first time in a recreational estuarine area in Brazil, contributing to knowledge of their molecular and environmental epidemiology, which is considered scarce even in marine and estuarine areas of the world.	2-s2.0-85046014560	No	MB	new detection in marine
2940	7910	Kalyoncu, H., Dayioglu, H., Kilcik, F.	Using diatoms in water quality assessment in the andik stream (Isparta-Turkey)	2016	Fresenius Environmental Bulletin	25	12	NA	5237	5244	NA	NA	NA	https://www.scopus.com/inward/record.url?eid=2-s2.0-85034030434&partnerID=40&md5=8e309b4ee7bc114ceeec26f6e4918bb5	Article	NA	Scopus	In this study, water and epilithic diatom samples were collected from 6 stations selected between July 2010-June 2011 along the Andik Stream. The most dominant genus in station 1 was Navicula (36,42%), in station 2 Navicula (26,86%), in station 3 Ulnaria (24,98%), in station 4 Navicula (32,6%), in station 5 Cocconeis (15,41%), in station 6 Nitzschia (55,51%) at the Andik Stream. At the first thre…	Using diatoms in water quality assessment in the andik stream (Isparta-Turkey) In this study, water and epilithic diatom samples were collected from 6 stations selected between July 2010-June 2011 along the Andik Stream. The most dominant genus in station 1 was Navicula (36,42%), in station 2 Navicula (26,86%), in station 3 Ulnaria (24,98%), in station 4 Navicula (32,6%), in station 5 Cocconeis (…	According to Physicochemical parameters, the first five stations were determined as oligosaprop and station six as betamesosaprob.	2-s2.0-85034030434	no		not about detections in aquatic environment
1762	18521	Kozyaeva, V.V., Grouzdev, D.S., Dziuba, M.V., Kolganova, T.V., Kuznetsov, B.B.	Diversity of magnetotactic bacteria of the Moskva River	2017	Microbiology (Russian Federation)	86	1	NA	106	112	NA	NA	10.1134/S0026261717010088	https://www.scopus.com/inward/record.url?eid=2-s2.0-85013082893&partnerID=40&md5=be7b92b4bd3640fcb6fd9e3e93c2dabf	Article	NA	Scopus	Â© 2017, Pleiades Publishing, Ltd.Diversity of magnetotactic bacteria in the Moskva River at the Strogino area was studied using microscopy and phylogenetic analysis. Magnetotactic cocci were the predominant morphotype. Phylogenetic analysis of the 16S rRNA gene sequences revealed 13 OTUs of the orders Magnetococcales and Rhodospirillales, class Alphaproteobacteria. The shares of the relevant seq…	Diversity of magnetotactic bacteria of the Moskva River <U+FFFD><U+FFFD> 2017, Pleiades Publishing, Ltd.Diversity of magnetotactic bacteria in the Moskva River at the Strogino area was studied using microscopy and phylogenetic analysis. Magnetotactic cocci were the predominant morphotype. Phylogenetic analysis of the 16S rRNA gene sequences revealed 13 OTUs of the orders Magnetococcales and Rhodo…	According to the results of the 16S rRNA gene sequencing, the isolate was identified as a new Magnetospirillum species.	2-s2.0-85013082893	yes	MB
1417	7117	Dulger, G., Bircan, D., Dulger, B.	First report of Enterobacter ludwigii and Averyella dalhousiensis from well waters in Konya/Turkey	2016	Fresenius Environmental Bulletin	25	9	NA	3694	3699	NA	NA	NA	https://www.scopus.com/inward/record.url?eid=2-s2.0-84997496982&partnerID=40&md5=5684ae2d5cac801aef11abcee7f9c33e	Article	NA	Scopus	Copyright Â© by PSP and PRT. In this study, while doing research about the microbiological quality of 20 different well water samples which are used for drinking and domestic water by people in Kapakli (Ilgin-Konya/Turkey) between March-May 2015, it was aimed to determine the existence of motile Aeromonas in three well water samples which has the maximum total coliform number (>1100 MNP/100 mL). …	First report of Enterobacter ludwigii and Averyella dalhousiensis from well waters in Konya/Turkey Copyright <U+FFFD><U+FFFD> by PSP and PRT. In this study, while doing research about the microbiological quality of 20 different well water samples which are used for drinking and domestic water by people in Kapakli (Ilgin-Konya/Turkey) between March-May 2015, it was aimed to determine the existence…	According to the results, Enterobacter ludwigii and Averyella dalhousiensis were put on the record for the first time in Turkey via this study.	2-s2.0-84997496982	Yes	MB
1789	21287	Khorsandi, H., Mohammadi, A., Kariminejad, F., Haghighi, M., Karimzadeh, S., Khorsandi, J., Aghapour, A.A.	Optimizing linear alkyl benzene sulfonate removal using Fenton oxidation process in Taguchi Method	2016	Journal of Water Chemistry and Technology	38	5	NA	266	272	NA	2	10.3103/S1063455X16050040	https://www.scopus.com/inward/record.url?eid=2-s2.0-85013771371&partnerID=40&md5=0a35f8f2edbdd8be0fdf8eba2285a170	Article	NA	Scopus	Â© 2016, Allerton Press, Inc. Linear alkyl benzene sulfonate (LAS), which is the most common used anionic surfactant in detergents manufacturing, can discharge onto water resources through wastewater and causes change in taste and odor, disruption in water treatment processes, aquatics death, and oxygen transfer limitation. Accordingly, this article investigates to optimize LAS removal using Fent…	Optimizing linear alkyl benzene sulfonate removal using Fenton oxidation process in Taguchi Method <U+FFFD><U+FFFD> 2016, Allerton Press, Inc. Linear alkyl benzene sulfonate (LAS), which is the most common used anionic surfactant in detergents manufacturing, can discharge onto water resources through wastewater and causes change in taste and odor, disruption in water treatment processes, aquatics…	Accordingly, this article investigates to optimize LAS removal using Fenton oxidation process in Taguchi Method for the first time.	2-s2.0-85013771371	No		not about detections in aquatic environment
865	7387	Rocha, M.J., Cruzeiro, C., Reis, M., Pardal, M.Ã‚., Rocha, E.	Pollution by endocrine disruptors in a southwest european temperate coastal lagoon (ria de aveiro, Portugal)	2016	Environmental Monitoring and Assessment	188	2	101	NA	NA	NA	7	10.1007/s10661-016-5114-9	https://www.scopus.com/inward/record.url?eid=2-s2.0-84975906859&partnerID=40&md5=a88f6822e9e1dce719c359c9027bf364	Article	NA	Scopus	Â© Springer International Publishing Switzerland 2016. Ria de Aveiro is a Portuguese lagoon renowned for its ecological and economic importance. Nonetheless, in literature, few data exist about its organic pollution. Accordingly, this study chemically monitored for the first time a series of 17 endocrine disruptor compounds (EDCs). The target EDCs include natural (17Î²-oestradiol, oestrone) and p…	Pollution by endocrine disruptors in a southwest european temperate coastal lagoon (ria de aveiro, Portugal) <U+FFFD><U+FFFD> Springer International Publishing Switzerland 2016. Ria de Aveiro is a Portuguese lagoon renowned for its ecological and economic importance. Nonetheless, in literature, few data exist about its organic pollution. Accordingly, this study chemically monitored for the first …	Accordingly, this study chemically monitored for the first time a series of 17 endocrine disruptor compounds (EDCs).	2-s2.0-84975906859	yes	CH	first time a series of 17 endocrine disruptor compounds (EDCs).
3147	12205	KovÃ¡Äik, J., AntoÅ¡, V., Micalizzi, G., Dresler, S., HrabÃ¡k, P., Mondello, L.	Accumulation and toxicity of organochlorines in green microalgae	2018	Journal of Hazardous Materials	347	NA	NA	168	175	NA	NA	10.1016/j.jhazmat.2017.12.056	https://www.scopus.com/inward/record.url?eid=2-s2.0-85040090070&partnerID=40&md5=eff621025c2aa51ed67bb037b5d9b4ae	Article	NA	Scopus	Â© 2017 Elsevier B.V. Toxicity of mine dump effluent containing five hexachlorocyclohexane (Î± Î² Î³ Î´ and Îµ-HCH, sum 159.4 Î¼g/L) and two trichlorobenzene (TCB, sum 65.2 Î¼g/L) isomers to two microalgae (Scenedesmus quadricauda and Coccomyxa subellipsoidea) was studied over 24 h exposure and also with 2- and 10-fold diluted stock solution (i.e. 1Ã— 0.5Ã— and 0.1Ã— strength). Individual isomers…	Accumulation and toxicity of organochlorines in green microalgae <U+FFFD><U+FFFD> 2017 Elsevier B.V. Toxicity of mine dump effluent containing five hexachlorocyclohexane (<U+FFFD><U+FFFD> <U+FFFD><U+FFFD> <U+FFFD><U+FFFD> <U+FFFD><U+FFFD> and <U+FFFD><U+FFFD>-HCH, sum 159.4 <U+FFFD><U+FFFD>g/L) and two trichlorobenzene (TCB, sum 65.2 <U+FFFD><U+FFFD>g/L) isomers to two microalgae (Scenedesmus qua…	Accumulation of organochlorines and metabolic responses in algae are reported here for the first time.	2-s2.0-85040090070	yes	CH	new detection in biota
2646	2474	Zhao, Y., Huang, Z., Wei, C., Wang, Q., Xie, K., Chang, W., Wu, C., Wang, Y., Qi, X., Li, Z.	Accurate Determination of Tributyltin in Tannery Wastewater by a New Procedure Using ID-HPLCâ€“ICP-MS Combined with Low Temperature Extraction	2017	Chromatographia	80	11	NA	1623	1631	NA	NA	10.1007/s10337-017-3394-z	https://www.scopus.com/inward/record.url?eid=2-s2.0-85028830245&partnerID=40&md5=5453c093185eb12b8946f10367ce388d	Article	NA	Scopus	Â© 2017, Springer-Verlag GmbH Germany.Isotope dilution mass spectrometry is recognized as a primary method to obtain traceable values in the measurement of substances including trace elements and their organometallic compounds. This paper reports a novel method where isotope dilution high performance liquid chromatography inductively coupled plasma mass spectrometry (ID-HPLCâ€“ICP-MS) was combine…	Accurate Determination of Tributyltin in Tannery Wastewater by a New Procedure Using ID-HPLC<U+FFFD><U+FFFD><U+FFFD>ICP-MS Combined with Low Temperature Extraction <U+FFFD><U+FFFD> 2017, Springer-Verlag GmbH Germany.Isotope dilution mass spectrometry is recognized as a primary method to obtain traceable values in the measurement of substances including trace elements and their organometallic comp…	Accurate Determination of Tributyltin in Tannery Wastewater by a New Procedure Using ID-HPLC<U+FFFD><U+FFFD><U+FFFD>ICP-MS Combined with Low Temperature Extraction <U+FFFD><U+FFFD> 2017, Springer-Verlag GmbH Germany.	2-s2.0-85028830245	No		not about detections in aquatic environment
3936	9582	Sinninghe DamstÃ©, J.S., Rijpstra, W.I.C., Foesel, B.U., Huber, K.J., Overmann, J., Nakagawa, S., Kim, J.J., Dunfield, P.F., Dedysh, S.N., Villanueva, L.	An overview of the occurrence of ether- and ester-linked iso-diabolic acid membrane lipids in microbial cultures of the Acidobacteria: Implications for brGDGT paleoproxies for temperature and pH	2018	Organic Geochemistry	124	NA	NA	63	76	NA	NA	10.1016/j.orggeochem.2018.07.006	https://www.scopus.com/inward/record.url?eid=2-s2.0-85050735179&partnerID=40&md5=210461d16ba70b4868991ccdbd619e59	Article	Open Access	Scopus	Â© 2018 The Author(s) 13,16-Dimethyl octacosanedioic acid (iso-diabolic acid) is a major membrane-spanning lipid of subdivisions (SDs) 1, 3 and 4 of the Acidobacteria, a highly diverse phylum within the Bacteria. It has been suggested that these lipids are potential building blocks for the orphan bacterial glycerol dialkyl glycerol tetraethers (GDGT) that occur widely in a variety of environmenta…	An overview of the occurrence of ether- and ester-linked iso-diabolic acid membrane lipids in microbial cultures of the Acidobacteria: Implications for brGDGT paleoproxies for temperature and pH <U+FFFD><U+FFFD> 2018 The Author(s) 13,16-Dimethyl octacosanedioic acid (iso-diabolic acid) is a major membrane-spanning lipid of subdivisions (SDs) 1, 3 and 4 of the Acidobacteria, a highly diverse phylu…	Acid hydrolysis of total cell material released iso-diabolic acid in substantial quantities (25<U+FFFD><U+FFFD><U+FFFD>39% of all fatty acids) from the strains of SDs 1 and 3 (except <U+FFFD><U+FFFD><U+FFFD>Candidatus Solibacter usitatus<U+FFFD><U+FFFD><U+FFFD>), and, for the first time, strains of SD 6 (6<U+FFFD><U+FFFD><U+FFFD>25%), but not from SDs 8, 10, and 23.	2-s2.0-85050735179	No		not about detections in aquatic environment
2665	566	Han, Y., Ma, M., Li, N., Hou, R., Huang, C., Oda, Y., Wang, Z.	Chlorination, chloramination and ozonation of carbamazepine enhance cytotoxicity and genotoxicity: Multi-endpoint evaluation and identification of its genotoxic transformation products	2018	Journal of Hazardous Materials	342	NA	NA	679	688	NA	NA	10.1016/j.jhazmat.2017.08.076	https://www.scopus.com/inward/record.url?eid=2-s2.0-85028995683&partnerID=40&md5=4a1865daee4305c2163a4163fed7581e	Article	NA	Scopus	Â© 2017 Elsevier B.V. Investigations have focused on the removal and transformation of pharmaceuticals during drinking water and wastewater treatment. In the present study, we investigated for the first time the changes of the cytotoxicity and genotoxicity based on different modes of action (MoAs) during chlorination, chloramination and ozonation processes of the anti-epileptic drug carbamazepine…	Chlorination, chloramination and ozonation of carbamazepine enhance cytotoxicity and genotoxicity: Multi-endpoint evaluation and identification of its genotoxic transformation products <U+FFFD><U+FFFD> 2017 Elsevier B.V. Investigations have focused on the removal and transformation of pharmaceuticals during drinking water and wastewater treatment. In the present study, we investigated for the fir…	Acridine, 9 (10) H-acridone, chlorinated 9 (10) H-acridone and TP-237, which were first identified in the chlorination or chloramination processes, were predicted to be the DNA damaging agents.	2-s2.0-85028995683	yes	CH	Acridine, 9 (10) H-acridone, chlorinated 9 (10) H-acridone and TP-237, which were first identified in the chlorination or chloramination processes, were predicted to be the DNA damaging agents.
3311	13513	Burdet, C., GuÃ©gan, J.-F., Duval, X., Le Tyrant, M., Bergeron, H., Manuguerra, J.-C., Raude, J., Leport, C., Zylberman, P.	Need for integrative thinking to fight against emerging infectious diseases. Proceedings of the 5th seminar on emerging infectious diseases, March 22, 2016 â€“ current trends and proposals | La nÃ©cessitÃ© d'une approche intÃ©grative pour comprendre et lutter contre les maladies infectieuses Ã©mergentes. Actes du 5<sup>e</sup>sÃ©minaire maladies infectieuses Ã©mergentes, 22 mars 2016 â€“ actualit…	2018	Revue d'Epidemiologie et de Sante Publique	66	1	NA	81	90	NA	NA	10.1016/j.respe.2017.08.001	https://www.scopus.com/inward/record.url?eid=2-s2.0-85042402638&partnerID=40&md5=c7909731db26df96473e77d92cd99402	Article	NA	Scopus	Â© 2017 Elsevier Masson SAS We present here the proceedings of the 5th seminar on emerging infectious diseases, held in Paris on March 22nd, 2016, with seven priority proposals that can be outlined as follows: encourage research on the prediction, screening and early detection of new risks of infection; develop research and surveillance concerning transmission of pathogens between animals and hum…	Need for integrative thinking to fight against emerging infectious diseases. Proceedings of the 5th seminar on emerging infectious diseases, March 22, 2016 <U+FFFD><U+FFFD><U+FFFD> current trends and proposals | La n<U+FFFD><U+FFFD>cessit<U+FFFD><U+FFFD> d'une approche int<U+FFFD><U+FFFD>grative pour comprendre et lutter contre les maladies infectieuses <U+FFFD><U+FFFD>mergentes. Actes du 5<sup>e…	Actes du 5<sup>e</sup>s<U+FFFD><U+FFFD>minaire maladies infectieuses <U+FFFD><U+FFFD>mergentes, 22 mars 2016 <U+FFFD><U+FFFD><U+FFFD> actualit<U+FFFD><U+FFFD>s et propositions <U+FFFD><U+FFFD> 2017 Elsevier Masson SAS We present here the proceedings of the 5th seminar on emerging infectious diseases, held in Paris on March 22nd, 2016, with seven priority proposals that can be outlined as follows:…	2-s2.0-85042402638	no		not about detections in aquatic environment
475	5992	Seng, P., Boushab, B.M., Romain, F., Gouriet, F., Bruder, N., Martin, C., Paganelli, F., Bernit, E., Treut, Y.P.L., Thomas, P., Papazian, L., Raoult, D., Stein, A.	Emerging role of Raoultella ornithinolytica in human infections: A series of cases and review of the literature	2016	International Journal of Infectious Diseases	45	NA	NA	65	71	NA	15	10.1016/j.ijid.2016.02.014	https://www.scopus.com/inward/record.url?eid=2-s2.0-84960858085&partnerID=40&md5=c913ac7d287d40ccb11fa265d5e10f10	Article	Open Access	Scopus	Â© 2016 The Authors. Background: Raoultella ornithinolytica is known to inhabit aquatic environments. The clinical features and outcomes of human infections caused by R. ornithinolytica have been reported for only a limited number of cases. Methods: A retrospective study of cases of infection caused by R. ornithinolytica managed at four university hospital centres during the period before and aft…	Emerging role of Raoultella ornithinolytica in human infections: A series of cases and review of the literature <U+FFFD><U+FFFD> 2016 The Authors. Background: Raoultella ornithinolytica is known to inhabit aquatic environments. The clinical features and outcomes of human infections caused by R. ornithinolytica have been reported for only a limited number of cases. Methods: A retrospective study o…	Additional diseases reported here for the first time included osteomyelitis, meningitis, cerebral abscess, mediastinitis, pericarditis, conjunctivitis, and otitis.	2-s2.0-84960858085	No		not about detections in aquatic environment
3810	10190	Delile, H., Goiran, J.P., Blichert-Toft, J.	The contribution of geochemistry to ancient harbor geoarcheology: The example of Ostia Antica	2018	Quaternary Science Reviews	193	NA	NA	170	187	NA	NA	10.1016/j.quascirev.2018.06.019	https://www.scopus.com/inward/record.url?eid=2-s2.0-85048979672&partnerID=40&md5=85ec7293a81879f432df14f625587677	Article	NA	Scopus	Â© 2018 Elsevier Ltd Once trapped in ancient harbor basins, sediments form environmental archives that have been widely studied by geoarcheologists in recent decades, especially to help reconstruct fluvio-marine landscapes of the last millennia. In some cases, classic environmental markers cannot be used for this purpose either because of their scarcity in the sedimentary deposits, or because ana…	The contribution of geochemistry to ancient harbor geoarcheology: The example of Ostia Antica <U+FFFD><U+FFFD> 2018 Elsevier Ltd Once trapped in ancient harbor basins, sediments form environmental archives that have been widely studied by geoarcheologists in recent decades, especially to help reconstruct fluvio-marine landscapes of the last millennia. In some cases, classic environmental markers …	Additionally, and also for the first time in harbor geoarcheology, Pb isotope compositions measured specifically on uncontaminated sediments demonstrate their utility for both identifying the geological sources of the sediments of the Tiber delta and discriminating finer from larger particles.	2-s2.0-85048979672	No		not about detections in aquatic environment
2328	16778	Causanilles, A., Kinyua, J., Ruttkies, C., van Nuijs, A.L.N., Emke, E., Covaci, A., de Voogt, P.	Qualitative screening for new psychoactive substances in wastewater collected during a city festival using liquid chromatography coupled to high-resolution mass spectrometry	2017	Chemosphere	184	NA	NA	1186	1193	NA	5	10.1016/j.chemosphere.2017.06.101	https://www.scopus.com/inward/record.url?eid=2-s2.0-85021281637&partnerID=40&md5=ffe0a164dba538538e1ed1a968ff532f	Article	NA	Scopus	Â© 2017 Elsevier LtdThe inclusion of new psychoactive substances (NPS) in the wastewater-based epidemiology approach presents challenges, such as the reduced number of users that translates into low concentrations of residues and the limited pharmacokinetics information available, which renders the choice of target biomarker difficult. The sampling during special social settings, the analysis wit…	Qualitative screening for new psychoactive substances in wastewater collected during a city festival using liquid chromatography coupled to high-resolution mass spectrometry <U+FFFD><U+FFFD> 2017 Elsevier LtdThe inclusion of new psychoactive substances (NPS) in the wastewater-based epidemiology approach presents challenges, such as the reduced number of users that translates into low concentratio…	Additionally, meta-chlorophenylpiperazine (mCPP), 2,5-dimethoxy-4-bromophenethylamine (2C-B), and 4-fluoroamphetamine (FA) were identified in wastewater for the first time.	2-s2.0-85021281637	Yes	CH	meta-chlorophenylpiperazine (mCPP), 2,5-dimethoxy-4-bromophenethylamine (2C-B), and 4-fluoroamphetamine (FA) were identified in wastewater for the first time.
2105	14896	Fieberg, J.E., KnutÃ¥s, P., Hostettler, K., Smith, G.D.	\paintings Fade Like Flowers\\: Pigment Analysis and Digital Reconstruction of a Faded Pink Lake Pigment in Vincent van Gogh's Undergrowth with Two Figures\\\""	2017	Applied Spectroscopy	71	5	NA	794	808	NA	5	10.1177/0003702816685097	https://www.scopus.com/inward/record.url?eid=2-s2.0-85018994894&partnerID=40&md5=5bdb99b1ac5518e55be283f268084a15	Article	NA	Scopus	Â© Society for Applied Spectroscopy. Color fading in Vincent van Gogh's Undergrowth with Two Figures was studied chemically to facilitate the creation of a digital reconstruction of fugitive colors. The painting contains a field of white, green, orange, and yellow flowers under a canopy of poplar trees with two central figures - a man and a woman, arms entwined. From Van Gogh's letters, however, …	\paintings Fade Like Flowers\\: Pigment Analysis and Digital Reconstruction of a Faded Pink Lake Pigment in Vincent van Gogh's Undergrowth with Two Figures\\\" <U+FFFD><U+FFFD> Society for Applied Spectroscopy. Color fading in Vincent van Gogh's Undergrowth with Two Figures was studied chemically to facilitate the creation of a digital reconstruction of fugitive colors. The painting contains a fi…	Additionally, microfadeometry was undertaken for the first time on a painting cross-section sample to understand the actual fading kinetics of the underlying bright pink geranium lake used by Van Gogh.	2-s2.0-85018994894	No		not about detections in aquatic environment
2027	3447	Wang, L., Dong, Y., Xu, Z.	A synthesis of hydrochemistry with an integrated conceptual model for groundwater in the Hexi Corridor, northwestern China	2017	Journal of Asian Earth Sciences	146	NA	NA	20	29	NA	1	10.1016/j.jseaes.2017.04.023	https://www.scopus.com/inward/record.url?eid=2-s2.0-85018239331&partnerID=40&md5=7fe7955453a2c8f985e96d6758d6944e	Review	NA	Scopus	Â© 2017Although many studies have investigated the recharge and evolution of groundwater in the Hexi Corridor, northwestern (NW) China, they describe individual sites such as Jinchang, Jiuquan, Dunhuang, and others. Considering the similarity of these sites, a systematic review of the entire Hexi Corridor is lacking. This paper compares and summarizes previous studies in the Hexi Corridor to prov…	A synthesis of hydrochemistry with an integrated conceptual model for groundwater in the Hexi Corridor, northwestern China <U+FFFD><U+FFFD> 2017Although many studies have investigated the recharge and evolution of groundwater in the Hexi Corridor, northwestern (NW) China, they describe individual sites such as Jinchang, Jiuquan, Dunhuang, and others. Considering the similarity of these sites, a s…	Additionally, on the basis of the review and integration of previous research, the regional groundwater cycle patterns in the Hexi Corridor are illustrated in the present study, and new research questions are identified for future work.	2-s2.0-85018239331	No		not about detections in aquatic environment
1294	20213	Liu, X.-H., Batueva, M.-D., Zhao, Y.-L., Zhang, J.-Y., Zhang, Q.-Q., Li, T.-T., Li, A.-H.	Morphological and molecular characterisation of Myxobolus pronini n. sp. (Myxozoa: Myxobolidae) from the abdominal cavity and visceral serous membranes of the gibel carp Carassius auratus gibelio (Bloch) in Russia and China	2016	Parasites and Vectors	9	1	NA	1	11	NA	7	10.1186/s13071-016-1836-3	https://www.scopus.com/inward/record.url?eid=2-s2.0-84992420714&partnerID=40&md5=b007cd1b935b31b2bdc17c2a12959f7e	Article	NA	Scopus	Â© 2016 The Author(s).Background: Myxozoa is a well-known economically and ecologically important group of metazoan parasites, phylogenetically related to Cnidaria. High diversity of myxosporeans has been recorded in Russia and China; however, most of the species were solely morphologically characterised. Here, we identified a new gibel carp-infecting Myxobolus species and morphologically and mol…	Morphological and molecular characterisation of Myxobolus pronini n. sp. (Myxozoa: Myxobolidae) from the abdominal cavity and visceral serous membranes of the gibel carp Carassius auratus gibelio (Bloch) in Russia and China <U+FFFD><U+FFFD> 2016 The Author(s).Background: Myxozoa is a well-known economically and ecologically important group of metazoan parasites, phylogenetically related to Cnidar…	Additionally, phylogenetic analysis based on all obtained ITS sequences showed that distinct genetic geographical differentiation occurred for this new parasite.	2-s2.0-84992420714	No		not about detections in aquatic environment
782	22537	Ozsurekci, Y., Oktay ArÄ±kan, K., Bayhan, C., KaradaÄŸ-Ã–ncel, E., Emre Aycan, A., GÃ¼rbÃ¼z, V., HasÃ§elik, G., Ceyhan, M.	Can procalcitonin be a diagnostic marker for catheter-related blood stream infection in children? | A procalcitonina pode ser um marcador de diagnÃ³stico de infecÃ§Ãµes de corrente sanguÃ­nea relacionadas a cateter em crianÃ§as?	2016	Jornal de Pediatria	92	4	NA	414	420	NA	5	10.1016/j.jped.2015.11.004	https://www.scopus.com/inward/record.url?eid=2-s2.0-84971647367&partnerID=40&md5=644c3bc9f1eb6dca7535d090628c33c1	Article	Open Access	Scopus	Â© 2016 Sociedade Brasileira de Pediatria Objective The potential role of procalcitonin (PCT) in the diagnosis of catheter-related bloodstream infection (CRBSIs) is still unclear and requires further research. The diagnostic value of serum PCT for the diagnosis of CRBSI in children is evaluated here. Method This study was conducted between October 2013 and November 2014, and included patients wit…	Can procalcitonin be a diagnostic marker for catheter-related blood stream infection in children? | A procalcitonina pode ser um marcador de diagn<U+FFFD><U+FFFD>stico de infec<U+FFFD><U+FFFD><U+FFFD><U+FFFD>es de corrente sangu<U+FFFD><U+FFFD>nea relacionadas a cateter em crian<U+FFFD><U+FFFD>as? <U+FFFD><U+FFFD> 2016 Sociedade Brasileira de Pediatria Objective The potential role of procalcitoni…	Additionally, the clinical performance of a new, automated, rapid, and quantitative assay for the detection of PCT was tested.	2-s2.0-84971647367	No		not about detections in aquatic environment
1107	7205	Forrestal, C., Haeger, A., Dankovich, L., Cath, T.Y., Ren, Z.J.	A liter-scale microbial capacitive deionization system for the treatment of shale gas wastewater	2016	Environmental Science: Water Research and Technology	2	2	NA	353	361	NA	7	10.1039/c5ew00211g	https://www.scopus.com/inward/record.url?eid=2-s2.0-84984920711&partnerID=40&md5=082fdb37ecb4f69f6a7074b09698dda4	Article	NA	Scopus	Â© 2016 The Royal Society of Chemistry. Sustainable wastewater management is among the biggest challenges in shale oil and gas exploration and production. Here we present the first prototype microbial capacitive deionization (MCD) system for both organic carbon and total dissolved solids (TDS) removal from wastewater with simultaneous electricity production. The 2.2 liter spiral wound reactor was…	A liter-scale microbial capacitive deionization system for the treatment of shale gas wastewater <U+FFFD><U+FFFD> 2016 The Royal Society of Chemistry. Sustainable wastewater management is among the biggest challenges in shale oil and gas exploration and production. Here we present the first prototype microbial capacitive deionization (MCD) system for both organic carbon and total dissolved solids…	Additionally, the influence of electrical potential applied to a capacitive deionization assembly on microbial electron transfer was characterized for the first time.	2-s2.0-84984920711	No		not about detections in aquatic environment
2687	92	Crnkovic, C.M., May, D.S., Orjala, J.	The impact of culture conditions on growth and metabolomic profiles of freshwater cyanobacteria	2018	Journal of Applied Phycology	30	1	NA	375	384	NA	1	10.1007/s10811-017-1275-3	https://www.scopus.com/inward/record.url?eid=2-s2.0-85029478906&partnerID=40&md5=51cbe43d7c72216a4354158b2b6274ea	Article	NA	Scopus	Â© 2017, Springer Science+Business Media B.V.Cultured cyanobacteria produce secondary metabolites with a wide range of biological activities and are an important source of natural products. In the context of secondary metabolite discovery, microbial culture conditions are expected to support optimum growth, induce maximum chemical diversity, and be suitable for the majority of cyanobacterial stra…	The impact of culture conditions on growth and metabolomic profiles of freshwater cyanobacteria <U+FFFD><U+FFFD> 2017, Springer Science+Business Media B.V.Cultured cyanobacteria produce secondary metabolites with a wide range of biological activities and are an important source of natural products. In the context of secondary metabolite discovery, microbial culture conditions are expected to supp…	Additionally, these experiments led to the identification of a potentially new peptide produced by strain UIC 10036.	2-s2.0-85029478906	no		Not about first detection MB/CH (new peptide)
481	8543	Devoe, N.C., Corbett, I.J., Barker, L., Chang, R., Gudis, P., Mullen, N., Perez, K., Raposo, H., Scholz, J., May, M.	Differential evolutionary selection and natural evolvability observed in ALT proteins of human filarial parasites	2016	PLoS ONE	11	2	148611	NA	NA	NA	NA	10.1371/journal.pone.0148611	https://www.scopus.com/inward/record.url?eid=2-s2.0-84960912079&partnerID=40&md5=2d32157c461495a5ba2edcb6dca7bb86	Article	Open Access	Scopus	Â© 2016 Devoe et al. This is an open access article distributed under the terms of the Creative Commons Attribution License, which permits unrestricted use, distribution, and reproduction in any medium, provided the original author and source are credited.The abundant larval transcript (ALT-2) protein is present in all members of the Filarioidea, and has been reported as a potential candidate ant…	Differential evolutionary selection and natural evolvability observed in ALT proteins of human filarial parasites <U+FFFD><U+FFFD> 2016 Devoe et al. This is an open access article distributed under the terms of the Creative Commons Attribution License, which permits unrestricted use, distribution, and reproduction in any medium, provided the original author and source are credited.The abundant la…	Additionally, this represents the first mathematical description of evolvability in a naturally occurring setting.	2-s2.0-84960912079	No		not about detections in aquatic environment
476	5002	Karangwa, P., Blomme, G., Beed, F., Niyongere, C., Viljoen, A.	The distribution and incidence of banana Fusarium wilt in subsistence farming systems in east and central Africa	2016	Crop Protection	84	NA	NA	132	140	NA	3	10.1016/j.cropro.2016.03.003	https://www.scopus.com/inward/record.url?eid=2-s2.0-84960859460&partnerID=40&md5=5b097584f72136a1de8e60925be0e94f	Article	NA	Scopus	Â© 2016 Elsevier Ltd.Bananas (Musa spp.) are major staple and cash crops in the Great Lakes region of Africa. Yet, banana yields in this region are among the lowest in the world due to a wide range of abiotic, biotic and socio-economic causes. Cropping systems which could contribute to soil fertility replenishment, pest and disease suppression and climate change mitigation might improve banana yi…	The distribution and incidence of banana Fusarium wilt in subsistence farming systems in east and central Africa <U+FFFD><U+FFFD> 2016 Elsevier Ltd.Bananas (Musa spp.) are major staple and cash crops in the Great Lakes region of Africa. Yet, banana yields in this region are among the lowest in the world due to a wide range of abiotic, biotic and socio-economic causes. Cropping systems which could…	Additionally, this study reports for the first time the occurrence of Fusarium oxysporum f. sp. cubense race 2 in Rwanda and Burundi, and suggests that strategies for banana Fusarium wilt management in east and central Africa should include raising farmers' awareness on pathogen spread mechanisms and enhancing their access to disease-free planting materials.	2-s2.0-84960859460	No		not about detections in aquatic environment
770	21370	Cabello, M., Orza, J.A.G., DueÃ¯Â¿Â½as, C., Liger, E., Gordo, E., CaÃ¯Â¿Â½ete, S.	Back-trajectory analysis of African dust outbreaks at a coastal city in southern Spain: Selection of starting heights and assessment of African and concurrent Mediterranean contributions	2016	Atmospheric Environment	140	NA	NA	10	21	NA	4	10.1016/j.atmosenv.2016.05.047	https://www.scopus.com/inward/record.url?eid=2-s2.0-84971468315&partnerID=40&md5=27df108516b252065a5d1c25fed8b489	Article	NA	Scopus	Ã¯Â¿Â½ 2016 Elsevier Ltd.The present study uses a back-trajectory analysis at multiple heights for better interpretation of the impact of the African dust outbreaks in the coastal Mediterranean city of MÃ¯Â¿Â½laga (Spain), the southernmost large city in Europe. Throughout a 3-year period, 363 days were identified as dusty days by atmospheric transport models. During these events, PM10, SO2, O3, t…	Back-trajectory analysis of African dust outbreaks at a coastal city in southern Spain: Selection of starting heights and assessment of African and concurrent Mediterranean contributions <U+FFFD><U+FFFD><U+FFFD><U+FFFD><U+FFFD><U+FFFD> 2016 Elsevier Ltd.The present study uses a back-trajectory analysis at multiple heights for better interpretation of the impact of the African dust outbreaks in th…	Additionally, with the aim of studying the influence of the air mass origin and history on air quality, a new procedure based on Principal component analysis (PCA) is proposed to determine which altitudes are best suited as starting points for back-trajectory calculations, as they maximize the differences in residence time over different areas.	2-s2.0-84971468315	No		not about detections in aquatic environment
1875	14693	Raja, H.A., Paguigan, N.D., Fournier, J., Oberlies, N.H.	Additions to Lindgomyces (Lindgomycetaceae, Pleosporales, Dothideomycetes), including two new species occurring on submerged wood from North Carolina, USA, with notes on secondary metabolite profiles	2017	Mycological Progress	16	5	NA	535	552	NA	1	10.1007/s11557-017-1282-4	https://www.scopus.com/inward/record.url?eid=2-s2.0-85015199096&partnerID=40&md5=d9b60772c66b6d20c91b3819496975cc	Article	NA	Scopus	Â© 2017, German Mycological Society and Springer-Verlag Berlin Heidelberg. Two new species of freshwater ascomycetes belonging to the genus Lindgomyces (Pleosporales, Dothideomycetes) are described and illustrated from submerged wood in North Carolina, USA. Lindgomyces carolinensis is characterized by immersed to erumpent ascomata, fissitunicate broadly cylindrical to clavate asci, and fusiform a…	Additions to Lindgomyces (Lindgomycetaceae, Pleosporales, Dothideomycetes), including two new species occurring on submerged wood from North Carolina, USA, with notes on secondary metabolite profiles <U+FFFD><U+FFFD> 2017, German Mycological Society and Springer-Verlag Berlin Heidelberg. Two new species of freshwater ascomycetes belonging to the genus Lindgomyces (Pleosporales, Dothideomycetes) a…	Additions to Lindgomyces (Lindgomycetaceae, Pleosporales, Dothideomycetes), including two new species occurring on submerged wood from North Carolina, USA, with notes on secondary metabolite profiles <U+FFFD><U+FFFD> 2017, German Mycological Society and Springer-Verlag Berlin Heidelberg.	2-s2.0-85015199096	No		not about detections in aquatic environment
500	5358	Griffith, J.F., Weisberg, S.B., Arnold, B.F., Cao, Y., Schiff, K.C., Colford, J.M.	Epidemiologic evaluation of multiple alternate microbial water quality monitoring indicators at three California beaches	2016	Water Research	94	NA	NA	371	381	NA	13	10.1016/j.watres.2016.02.036	https://www.scopus.com/inward/record.url?eid=2-s2.0-84961194696&partnerID=40&md5=01bb58528362aac1e0f89aff06f8c718	Article	NA	Scopus	Â© 2016 Elsevier Ltd. Introduction: Advances in molecular methods provide new opportunities for directly measuring pathogens or host-associated markers of fecal pollution instead of relying on fecal indicator bacteria (FIB) alone for beach water quality monitoring. Adoption of new indicators depends on identifying relationships between either the presence or concentration of the indicators and il…	Epidemiologic evaluation of multiple alternate microbial water quality monitoring indicators at three California beaches <U+FFFD><U+FFFD> 2016 Elsevier Ltd. Introduction: Advances in molecular methods provide new opportunities for directly measuring pathogens or host-associated markers of fecal pollution instead of relying on fecal indicator bacteria (FIB) alone for beach water quality monitoring…	Adoption of new indicators depends on identifying relationships between either the presence or concentration of the indicators and illness among swimmers.	2-s2.0-84961194696	No		not about detections in aquatic environment
3085	2058	Baumsteiger, J., Moyle, P.B., Aguilar, A., O'Rourke, S.M., Miller, M.R.	Genomics clarifies taxonomic boundaries in a difficult species complex	2017	PLoS ONE	12	12	e0189417	NA	NA	NA	NA	10.1371/journal.pone.0189417	https://www.scopus.com/inward/record.url?eid=2-s2.0-85038414318&partnerID=40&md5=7daa618fe5bed080ddf0e85c2251f646	Article	Open Access	Scopus	Â© 2017 Baumsteiger et al. This is an open access article distributed under the terms of the Creative Commons Attribution License, which permits unrestricted use, distribution, and reproduction in any medium, provided the original author and source are credited. Efforts to taxonomically delineate species are often confounded with conflicting information and subjective interpretation. Advances in …	Genomics clarifies taxonomic boundaries in a difficult species complex <U+FFFD><U+FFFD> 2017 Baumsteiger et al. This is an open access article distributed under the terms of the Creative Commons Attribution License, which permits unrestricted use, distribution, and reproduction in any medium, provided the original author and source are credited. Efforts to taxonomically delineate species are ofte…	Advances in genomic methods have resulted in a new approach to taxonomic identification that stands to greatly reduce much of this conflict.	2-s2.0-85038414318	no		new identification method
2484	15570	Renaud, J.B., Sabourin, L., Topp, E., Sumarah, M.W.	Spectral Counting Approach to Measure Selectivity of High-Resolution LC-MS Methods for Environmental Analysis	2017	Analytical Chemistry	89	5	NA	2747	2754	NA	2	10.1021/acs.analchem.6b03475	https://www.scopus.com/inward/record.url?eid=2-s2.0-85026630928&partnerID=40&md5=89ed489c88e066eeb6dc19001928ac21	Article	NA	Scopus	Â© Published 2017 by the American Chemical Society.Advances in high-resolution mass spectrometers have allowed for the development of nontargeted screening methods, where data sets can be archived and retrospectively mined as new environmental contaminants are identified. We have developed a spectral counting approach to calculate the selectivities of LC-MS acquisition modes taking mass accuracy,…	Spectral Counting Approach to Measure Selectivity of High-Resolution LC-MS Methods for Environmental Analysis <U+FFFD><U+FFFD> Published 2017 by the American Chemical Society.Advances in high-resolution mass spectrometers have allowed for the development of nontargeted screening methods, where data sets can be archived and retrospectively mined as new environmental contaminants are identified. We…	Advances in high-resolution mass spectrometers have allowed for the development of nontargeted screening methods, where data sets can be archived and retrospectively mined as new environmental contaminants are identified.	2-s2.0-85026630928	No		new identification method
1578	16479	Sano, H., Hilinski, J.A., Applegate, K., Chiang, K.-Y., Haight, A., Qayed, M., Horan, J.	African American Race Is a Newly Identified Risk Factor for Postengraftment Blood Stream Infections in Pediatric Allogeneic Blood and Marrow Transplantation	2017	Biology of Blood and Marrow Transplantation	23	2	NA	357	360	NA	NA	10.1016/j.bbmt.2016.10.023	https://www.scopus.com/inward/record.url?eid=2-s2.0-85008227656&partnerID=40&md5=bec2bf9e5686a095c4af380191247979	Article	Open Access	Scopus	Â© 2017 The American Society for Blood and Marrow Transplantation Blood stream infections (BSI) are a major source of morbidity and mortality both in allogeneic blood and marrow transplant (BMT) recipients. Various risk factors for BSI in BMT have been identified. The impact of race and cytomegalovirus (CMV) viremia, a common complication after engraftment, however, has not been rigorously assess…	African American Race Is a Newly Identified Risk Factor for Postengraftment Blood Stream Infections in Pediatric Allogeneic Blood and Marrow Transplantation <U+FFFD><U+FFFD> 2017 The American Society for Blood and Marrow Transplantation Blood stream infections (BSI) are a major source of morbidity and mortality both in allogeneic blood and marrow transplant (BMT) recipients. Various risk factors …	African American Race Is a Newly Identified Risk Factor for Postengraftment Blood Stream Infections in Pediatric Allogeneic Blood and Marrow Transplantation <U+FFFD><U+FFFD> 2017 The American Society for Blood and Marrow Transplantation Blood stream infections (BSI) are a major source of morbidity and mortality both in allogeneic blood and marrow transplant (BMT) recipients.	2-s2.0-85008227656	No		not about detections in aquatic environment
2086	15487	Oyserman, B.O., Martirano, J.M., Wipperfurth, S., Owen, B.R., Noguera, D.R., McMahon, K.D.	Community Assembly and Ecology of Activated Sludge under Photosynthetic Feast-Famine Conditions	2017	Environmental Science and Technology	51	6	NA	3165	3175	NA	3	10.1021/acs.est.6b03976	https://www.scopus.com/inward/record.url?eid=2-s2.0-85018745113&partnerID=40&md5=f717e9bb6d38e73a33928eb52df5d582	Article	NA	Scopus	Â© 2017 American Chemical Society.Here, we demonstrate that photosynthetic oxygen production under light-dark and feast-famine cycles with no mechanical aeration and negligible oxygen diffusion is able to maintain phosphorus cycling activity associated with the enrichment of polyphosphate accumulating organisms (PAOs). We investigate the ecology of this novel system by conducting a time series an…	Community Assembly and Ecology of Activated Sludge under Photosynthetic Feast-Famine Conditions <U+FFFD><U+FFFD> 2017 American Chemical Society.Here, we demonstrate that photosynthetic oxygen production under light-dark and feast-famine cycles with no mechanical aeration and negligible oxygen diffusion is able to maintain phosphorus cycling activity associated with the enrichment of polyphosphate…	After a month of operation, the most-abundant prokaryote belonged to an uncharacterized clade of Chlorobi classified as Chlorobiales;SJA-28 Clade III, the first reported enrichment of this lineage.	2-s2.0-85018745113	no		not about detections in aquatic environment
783	4946	Dupont, B., Datry, A., PoirÃ©e, S., Canestri, A., Boucheneb, S., Fourniols, E.	Role of a NSAID in the apparent cure of a fungal mycetoma	2016	Journal de Mycologie Medicale	26	2	NA	86	93	NA	4	10.1016/j.mycmed.2016.03.003	https://www.scopus.com/inward/record.url?eid=2-s2.0-84971657416&partnerID=40&md5=3fcc8139169dac3c3dca5079dc389a70	Article	NA	Scopus	Â© 2016 Elsevier Masson SAS.We report the case of a fungal mycetoma due to Madurella mycetomatis that failed to respond to surgery and antifungal treatment but responded strongly to the addition of a non-steroidal anti-inflammatory drug (NSAID). This African patient was born in Mauritania in 1972. He was a herdsman, living close to the Senegal River. The first nodules appeared on the left foot at…	Role of a NSAID in the apparent cure of a fungal mycetoma <U+FFFD><U+FFFD> 2016 Elsevier Masson SAS.We report the case of a fungal mycetoma due to Madurella mycetomatis that failed to respond to surgery and antifungal treatment but responded strongly to the addition of a non-steroidal anti-inflammatory drug (NSAID). This African patient was born in Mauritania in 1972. He was a herdsman, living cl…	After remission for several months after surgery, new fistulae occurred.	2-s2.0-84971657416	No		not about detections in aquatic environment
2753	2523	SaÃ§maci, Åž., SaÃ§maci, M., Ãœlgen, A.	A New Turn-On Fluorometric Detection Method for the Determination of Ag(I) in Some Food and Water Samples	2017	Journal of AOAC International	100	6	NA	1854	1860	NA	2	10.5740/jaoacint.17-0090	https://www.scopus.com/inward/record.url?eid=2-s2.0-85030316055&partnerID=40&md5=4154ff5195b2a40747812e2a6625a660	Article	NA	Scopus	A new sensitive and selective turn-on fluorometry procedure for the determination of silver using a laboratory-built fluorometry system is described herein. After synthesis and characterization, a [2-((E)-{[3',6'-bis(ethylamino)-2',7'-dimethyl-3-oxospiro[isoindole-1,9'-xanthen]-2(3H)-yl]imino}methyl)cyclopenta-2,4-dien-1-yl] (cyclopenta-2,4-dien-1-yl)iron (DKMS) fluorescent reagent was used for t…	A New Turn-On Fluorometric Detection Method for the Determination of Ag(I) in Some Food and Water Samples A new sensitive and selective turn-on fluorometry procedure for the determination of silver using a laboratory-built fluorometry system is described herein. After synthesis and characterization, a [2-((E)-{[3',6'-bis(ethylamino)-2',7'-dimethyl-3-oxospiro[isoindole-1,9'-xanthen]-2(3H)-yl]imino…	After synthesis and characterization, a [2-((E)-{[3',6'-bis(ethylamino)-2',7'-dimethyl-3-oxospiro[isoindole-1,9'-xanthen]-2(3H)-yl]imino}methyl)cyclopenta-2,4-dien-1-yl] (cyclopenta-2,4-dien-1-yl)iron (DKMS) fluorescent reagent was used for the first time.	2-s2.0-85030316055	no		new identification method
507	4826	Zhu, X.W., Mao, S.Y., Wu, N.Y., Jia, G.D., Sun, Y.G., Guan, H.X., Wu, D.D.	Detection and indication of 1,3,4-C<inf>27â€“29</inf> triol in the sediment of northern South China Sea	2016	Science China Earth Sciences	59	6	NA	1187	1194	NA	1	10.1007/s11430-016-5270-3	https://www.scopus.com/inward/record.url?eid=2-s2.0-84961209297&partnerID=40&md5=a3a398d9cfbd33db8c08904e46064f21	Article	NA	Scopus	Ã‚Â© 2016, Science China Press and Springer-Verlag Berlin Heidelberg.After the detection of the 1,20,21-C29 long-chain triol in some sediments and freshwater pteridophytes, in this study, a new homologous long-chain triol, 1,3,4-C27â€“29, is detected for the first time in the Site4B core sediment in the northern South China Sea. The hydroxyl location and length of the carbon chain of this newly d…	Detection and indication of 1,3,4-C<inf>27<U+FFFD><U+FFFD><U+FFFD>29</inf> triol in the sediment of northern South China Sea <U+FFFD><U+FFFD><U+FFFD><U+FFFD> 2016, Science China Press and Springer-Verlag Berlin Heidelberg.After the detection of the 1,20,21-C29 long-chain triol in some sediments and freshwater pteridophytes, in this study, a new homologous long-chain triol, 1,3,4-C27<U+FFFD><U+FFF…	After the detection of the 1,20,21-C29 long-chain triol in some sediments and freshwater pteridophytes, in this study, a new homologous long-chain triol, 1,3,4-C27<U+FFFD><U+FFFD><U+FFFD>29, is detected for the first time in the Site4B core sediment in the northern South China Sea.	2-s2.0-84961209297	No		not about detections in aquatic environment
824	22356	Veru, F., Jordan, G., Joober, R., Malla, A., Iyer, S.	Adolescent vs. adult onset of a first episode psychosis: Impact on remission of positive and negative symptoms	2016	Schizophrenia Research	174	01-mrt	NA	183	188	NA	3	10.1016/j.schres.2016.03.035	https://www.scopus.com/inward/record.url?eid=2-s2.0-84974662370&partnerID=40&md5=de2da8a61afa5a0013b36d5bc56ed7c0	Article	NA	Scopus	Â© 2016 Elsevier B.V. Objective: Adolescent-onset psychosis has traditionally been characterized as a more severe form of psychosis with a poorer prognosis. However, it is still unclear if patients with an adolescent-onset have worse symptom remission outcomes. Symptom remission is the principal clinical outcome known to predict quality of life and social functioning in the long term. The goal of…	Adolescent vs. adult onset of a first episode psychosis: Impact on remission of positive and negative symptoms <U+FFFD><U+FFFD> 2016 Elsevier B.V. Objective: Adolescent-onset psychosis has traditionally been characterized as a more severe form of psychosis with a poorer prognosis. However, it is still unclear if patients with an adolescent-onset have worse symptom remission outcomes. Symptom remi…	Age of onset of psychosis (adolescence vs. adulthood) was used as the main predictor, and duration of untreated psychosis (DUP), baseline symptoms, baseline functioning, substance abuse diagnosis, medication adherence and gender were used as covariates in hierarchical regression models predicting the following positive and negative symptom remission outcomes: maximum continuous months in remissio…	2-s2.0-84974662370	No		not about detections in aquatic environment
1330	20680	Gaikwad, V., Gohel, T., Panickar, S., Chincholkar, V., Mangalkar, S.	In vitro activity of ceftaroline: A novel antibiotic against methicillin-resistant Staphylococcus aureus	2016	Indian Journal of Pathology and Microbiology	59	4	NA	496	498	NA	1	10.4103/0377-4929.191798	https://www.scopus.com/inward/record.url?eid=2-s2.0-84994113175&partnerID=40&md5=3842752381f2650c06c3c5580f059664	Article	NA	Scopus	Â© 2016 Indian Journal of Pathology and Microbiology. Introduction: Staphylococcus is one of the most common causes of nosocomial infection, especially pneumonia, surgical site infections, blood stream infections, and continues to be a major cause of community-acquired infections. The emergence of penicillin resistance followed by the development and spread of strains resistant to the semisynthet…	In vitro activity of ceftaroline: A novel antibiotic against methicillin-resistant Staphylococcus aureus <U+FFFD><U+FFFD> 2016 Indian Journal of Pathology and Microbiology. Introduction: Staphylococcus is one of the most common causes of nosocomial infection, especially pneumonia, surgical site infections, blood stream infections, and continues to be a major cause of community-acquired infections…	Aim: The aim of this study was to detect in vitro activity of new cephalosporin, ceftaroline, against MRSA.	2-s2.0-84994113175	No		not about detections in aquatic environment
1733	7541	Sharifinia, M., Ramezanpour, Z., Namin, J.I.	Distribution of benthic centric diatom pleurosira laevis (CompÃ¨re, 1982) in different substrate type and physical and chemical variables | DistribuiÃ§Ã£o da diatomÃ¡cea cÃªntrica bentÃ´nica Pleurosira laevis (CompÃ¨re, 1982) em diferentes tipos de substrato e variÃ¡veis fÃ­sicas e quÃ­micas	2016	Acta Limnologica Brasiliensia	28	NA	e18	NA	NA	NA	NA	10.1590/S2179-975X2416	https://www.scopus.com/inward/record.url?eid=2-s2.0-85012886527&partnerID=40&md5=8c9795ad16045b798152045ab7352ff8	Article	NA	Scopus	Â© 2016 Sociedade Brasileira de Limnologia. All rights reserved. Aim: This contribution reports the first regional occurrence of Pleurosira laevis in the Masuleh River, Iran and additionally describes the pattern of occurrence along the Masuleh River and among four substrate types. The aim of this study was to assess the effects of substrate type and physical and chemical variables on distributio…	Distribution of benthic centric diatom pleurosira laevis (Comp<U+FFFD><U+FFFD>re, 1982) in different substrate type and physical and chemical variables | Distribui<U+FFFD><U+FFFD><U+FFFD><U+FFFD>o da diatom<U+FFFD><U+FFFD>cea c<U+FFFD><U+FFFD>ntrica bent<U+FFFD><U+FFFD>nica Pleurosira laevis (Comp<U+FFFD><U+FFFD>re, 1982) em diferentes tipos de substrato e vari<U+FFFD><U+FFFD>veis f<U+FFFD><U+FFF…	Aim: This contribution reports the first regional occurrence of Pleurosira laevis in the Masuleh River, Iran and additionally describes the pattern of occurrence along the Masuleh River and among four substrate types.	2-s2.0-85012886527	yes	MB
1499	16299	Elsadek, B., Mansour, A., Saleem, T., Warnecke, A., Kratz, F.	The antitumor activity of a lactosaminated albumin conjugate of doxorubicin in a chemically induced hepatocellular carcinoma rat model compared to sorafenib	2017	Digestive and Liver Disease	49	2	NA	213	222	NA	2	10.1016/j.dld.2016.10.003	https://www.scopus.com/inward/record.url?eid=2-s2.0-85006150735&partnerID=40&md5=c13b4c1dc05b4a7422347511c935cef0	Article	NA	Scopus	Â© 2016 Editrice Gastroenterologica Italiana S.r.l. Background Worldwide, consistent survival benefit for chemotherapy in hepatocellular carcinoma (HCC) is a golden goal for concerned researchers. NexavarÂ® (sorafenib) is the only approved agent that achieved touchable successes in this regard. Thus, there is a pressing medical need for new promising drugs to improve HCC therapy. Aims our designe…	The antitumor activity of a lactosaminated albumin conjugate of doxorubicin in a chemically induced hepatocellular carcinoma rat model compared to sorafenib <U+FFFD><U+FFFD> 2016 Editrice Gastroenterologica Italiana S.r.l. Background Worldwide, consistent survival benefit for chemotherapy in hepatocellular carcinoma (HCC) is a golden goal for concerned researchers. Nexavar<U+FFFD><U+FFFD> (sorafe…	Aims our designed lactosaminated albumin conjugate of doxorubicin (L-HSA<U+FFFD><U+FFFD><U+FFFD>DOXO) that rapidly and preferentially accumulates in the liver is compared, for the first time at its MTD, with doxorubicin and sorafenib, not only for antitumor efficacy but also for overall survival.	2-s2.0-85006150735	No		not about detections in aquatic environment
68	7283	Thakur, P.	Source term estimation and the isotopic ratio of radioactive material released from the WIPP repository in New Mexico, USA	2016	Journal of Environmental Radioactivity	151	NA	NA	193	203	NA	1	10.1016/j.jenvrad.2015.10.009	https://www.scopus.com/inward/record.url?eid=2-s2.0-84945205528&partnerID=40&md5=b734d7c49dcb427691baf5cde229b2ca	Article	NA	Scopus	Â© 2015 Elsevier Ltd.After almost 15 years of operations, the Waste Isolation Pilot Plant (WIPP) had one of its waste drums breach underground as a result of a runaway chemical reaction in the waste it contained. This incident occurred on February 14, 2014. Moderate levels of radioactivity were released into the underground air. A small portion of the contaminated underground air also escaped to …	Source term estimation and the isotopic ratio of radioactive material released from the WIPP repository in New Mexico, USA <U+FFFD><U+FFFD> 2015 Elsevier Ltd.After almost 15 years of operations, the Waste Isolation Pilot Plant (WIPP) had one of its waste drums breach underground as a result of a runaway chemical reaction in the waste it contained. This incident occurred on February 14, 2014. Mode…	Air monitoring across the WIPP site intensified following the first reports of radiation detection underground to determine the extent of impact to WIPP personnel, the public, and the environment.	2-s2.0-84945205528	No		not about detections in aquatic environment
2122	14045	Hidy, G.M., Mueller, P.K., Altshuler, S.L., Chow, J.C., Watson, J.G.	Air quality measurementsâ€”From rubber bands to tapping the rainbow	2017	Journal of the Air and Waste Management Association	67	6	NA	637	668	NA	1	10.1080/10962247.2017.1308890	https://www.scopus.com/inward/record.url?eid=2-s2.0-85019123835&partnerID=40&md5=82eb9bcb98ca910c7f98cb1e5004a92f	Review	NA	Scopus	Â© 2017 A&WMA.It is axiomatic that good measurements are integral to good public policy for environmental protection. The generalized term for â€œmeasurementsâ€ includes sampling and quantitation, data integrity, documentation, network design, sponsorship, operations, archiving, and accessing for applications. Each of these components has evolved and advanced over the last 200 years as knowledge…	Air quality measurements<U+FFFD><U+FFFD><U+FFFD>From rubber bands to tapping the rainbow <U+FFFD><U+FFFD> 2017 A&WMA.It is axiomatic that good measurements are integral to good public policy for environmental protection. The generalized term for <U+FFFD><U+FFFD><U+FFFD>measurements<U+FFFD><U+FFFD><U+FFFD> includes sampling and quantitation, data integrity, documentation, network design, sponsorsh…	Air quality was first detected by what people could see and smell in contaminated air.	2-s2.0-85019123835	No		not about detections in aquatic environment
1621	11132	Li, Y., Li, W., Liu, Q., Meng, H., Lu, Y., Li, C.	Alkynyl carbon materials as novel and efficient sorbents for the adsorption of mercury(II) from wastewater	2018	Journal of Environmental Sciences (China)	68	NA	NA	169	176	NA	7	10.1016/j.jes.2016.12.016	https://www.scopus.com/inward/record.url?eid=2-s2.0-85009863264&partnerID=40&md5=6e845472528a96bea14ef8b7577bb13b	Article	NA	Scopus	Â© 2017 For the first time, a series of alkynyl carbon materials (ACMs) were prepared via the mechanochemical reaction of CaC2 with six polyhalogenated precursors, namely CCl4, C2Cl6, C2Cl4, C6Cl6, C6Br6, and C14H4Br10 (ACM-1, ACM-2, ACM-3, ACM-4, ACM-5, and ACM-6, respectively) and used for the adsorptive removal of mercury from aqueous solutions. Based on preliminary investigations, the adsorpt…	Alkynyl carbon materials as novel and efficient sorbents for the adsorption of mercury(II) from wastewater <U+FFFD><U+FFFD> 2017 For the first time, a series of alkynyl carbon materials (ACMs) were prepared via the mechanochemical reaction of CaC2 with six polyhalogenated precursors, namely CCl4, C2Cl6, C2Cl4, C6Cl6, C6Br6, and C14H4Br10 (ACM-1, ACM-2, ACM-3, ACM-4, ACM-5, and ACM-6, respectively…	Alkynyl carbon materials as novel and efficient sorbents for the adsorption of mercury(II) from wastewater <U+FFFD><U+FFFD> 2017 For the first time, a series of alkynyl carbon materials (ACMs) were prepared via the mechanochemical reaction of CaC2 with six polyhalogenated precursors, namely CCl4, C2Cl6, C2Cl4, C6Cl6, C6Br6, and C14H4Br10 (ACM-1, ACM-2, ACM-3, ACM-4, ACM-5, and ACM-6, respectively…	2-s2.0-85009863264	No		not about detections in aquatic environment
3933	1035	Elias, E., McVey, D.S., Peters, D., Derner, J.D., Pelzel-McCluskey, A., Schrader, T.S., Rodriguez, L.	Contributions of Hydrology to Vesicular Stomatitis Virus Emergence in the Western USA	2018	Ecosystems	NA	NA	NA	NA	NA	NA	NA	10.1007/s10021-018-0278-5	https://www.scopus.com/inward/record.url?eid=2-s2.0-85050690585&partnerID=40&md5=2d3391a1fdb12f3aa62289abaf623338	Article in Press	NA	Scopus	Â© 2018, Springer Science+Business Media, LLC, part of Springer Nature. Relationships between environmental variables associated with the spread of vector-borne pathogens, such as RNA viruses transmitted to humans and animals, remain poorly understood. Vesicular stomatitis (VS) is caused by a vector-borne, zoonotic RNA virus (VSV) and is the most common vesicular disease affecting livestock (dome…	Contributions of Hydrology to Vesicular Stomatitis Virus Emergence in the Western USA <U+FFFD><U+FFFD> 2018, Springer Science+Business Media, LLC, part of Springer Nature. Relationships between environmental variables associated with the spread of vector-borne pathogens, such as RNA viruses transmitted to humans and animals, remain poorly understood. Vesicular stomatitis (VS) is caused by a vecto…	All first incidents (n = 35) occurred following peak annual streamflow, with 89% (31 of 35) of these occurring after streams returned to baseflow.	2-s2.0-85050690585	No		not about detections in aquatic environment
3319	1947	Prokina, K.I., Mylnikov, A.P., Zelalem, W.	First Data on Heterotrophic Flagellates and Heliozoans of Ethiopia	2017	Biology Bulletin	44	8	NA	896	912	NA	NA	10.1134/S106235901708012X	https://www.scopus.com/inward/record.url?eid=2-s2.0-85042498167&partnerID=40&md5=a8f498c9bd100db1968e7b00556d54cc	Article	NA	Scopus	Â© 2017, Pleiades Publishing, Inc. The species composition and external morphology of heterotrophic flagellates and heliozoans were studied in the freshwater habitats of various types in Ethiopia: Lake Tana and the rivers discharging into Lake Tana; two lakes in the Rift Valley; puddles on the banks of rivers and lakes and in a rice field. Altogether, 21 species and 11 forms of flagellates and tw…	First Data on Heterotrophic Flagellates and Heliozoans of Ethiopia <U+FFFD><U+FFFD> 2017, Pleiades Publishing, Inc. The species composition and external morphology of heterotrophic flagellates and heliozoans were studied in the freshwater habitats of various types in Ethiopia: Lake Tana and the rivers discharging into Lake Tana; two lakes in the Rift Valley; puddles on the banks of rivers and lak…	All identified species are new to the fauna of Ethiopia.	2-s2.0-85042498167	No		new detection in plants
2081	19497	AliÅŸ, N.I., Saler, S.	Zooplankton Composition of KarkamiÅŸ Dam Lake (Gaziantep-Turkey)	2016	Biharean Biologist	10	2	e161202	86	89	NA	NA	NA	https://www.scopus.com/inward/record.url?eid=2-s2.0-85018736035&partnerID=40&md5=d5c1a62c7d90bf0411b2d43fc276f1c4	Article	NA	Scopus	Â© Biharean Biologist, Oradea, Romania, 2016. Zooplankton of KarkamiÅŸ Dam Lake was investigated seasonally between April 2011 and May 2012 period. During the study, a total of 43 species (28 belong to phylum Rotifera, 10 to Cladocera and 5 Copepoda) were found in KarkamiÅŸ Dam Lake. All of the zooplanktonic species have been identified for the first time in KarkamiÅŸ Dam Lake. Some chemical and …	Zooplankton Composition of Karkami<U+FFFD><U+FFFD> Dam Lake (Gaziantep-Turkey) <U+FFFD><U+FFFD> Biharean Biologist, Oradea, Romania, 2016. Zooplankton of Karkami<U+FFFD><U+FFFD> Dam Lake was investigated seasonally between April 2011 and May 2012 period. During the study, a total of 43 species (28 belong to phylum Rotifera, 10 to Cladocera and 5 Copepoda) were found in Karkami<U+FFFD><U+FFFD> Dam…	All of the zooplanktonic species have been identified for the first time in Karkami<U+FFFD><U+FFFD> Dam Lake.	2-s2.0-85018736035	No		new detection in plants
3069	1718	Fu, L., Du, B., Wang, F., Lam, J.C.W., Zeng, L., Zeng, E.Y.	Organophosphate Triesters and Diester Degradation Products in Municipal Sludge from Wastewater Treatment Plants in China: Spatial Patterns and Ecological Implications	2017	Environmental Science and Technology	51	23	NA	13614	13623	NA	1	10.1021/acs.est.7b04106	https://www.scopus.com/inward/record.url?eid=2-s2.0-85038208304&partnerID=40&md5=7847384d7f2b895cd246cb6e4b0cbfd9	Article	NA	Scopus	Â© 2017 American Chemical Society. Little is known about the occurrences, distributions, sources, and potential risks of organophosphate (OP) triesters and diester degradation products in municipal sludge from wastewater treatment plants (WWTPs). In this study, we conducted the first nationwide survey to simultaneously determine a suite of 11 OP triesters and six diester degradation products in s…	Organophosphate Triesters and Diester Degradation Products in Municipal Sludge from Wastewater Treatment Plants in China: Spatial Patterns and Ecological Implications <U+FFFD><U+FFFD> 2017 American Chemical Society. Little is known about the occurrences, distributions, sources, and potential risks of organophosphate (OP) triesters and diester degradation products in municipal sludge from wastewat…	All OP triesters were detected and three diesters were identified for the first time in sludge samples.	2-s2.0-85038208304	Yes	CH	new detection in sludge
1409	19557	Suaria, G., Avio, C.G., Mineo, A., Lattin, G.L., Magaldi, M.G., Belmonte, G., Moore, C.J., Regoli, F., Aliani, S.	The Mediterranean Plastic Soup: Synthetic polymers in Mediterranean surface waters	2016	Scientific Reports	6	NA	37551	NA	NA	NA	47	10.1038/srep37551	https://www.scopus.com/inward/record.url?eid=2-s2.0-84996921165&partnerID=40&md5=1bea225f726a85d58e51d739e7e4d5d1	Article	NA	Scopus	Ã¯Â¿Â½ The Author(s) 2016. The Mediterranean Sea has been recently proposed as one of the most impacted regions of the world with regards to microplastics, however the polymeric composition of these floating particles is still largely unknown. Here we present the results of a large-scale survey of neustonic micro- and meso-plastics floating in Mediterranean waters, providing the first extensive c…	The Mediterranean Plastic Soup: Synthetic polymers in Mediterranean surface waters <U+FFFD><U+FFFD><U+FFFD><U+FFFD><U+FFFD><U+FFFD> The Author(s) 2016. The Mediterranean Sea has been recently proposed as one of the most impacted regions of the world with regards to microplastics, however the polymeric composition of these floating particles is still largely unknown. Here we present the results of…	All particles >700 <U+FFFD><U+FFFD>m collected in our samples were identified through FT-IR analysis (n = 4050 particles), shedding for the first time light on the polymeric diversity of this emerging pollutant.	2-s2.0-84996921165	No		not about detections in aquatic environment
3931	11036	Revnic, C., Abu-Nada, E., Grosan, T., Pop, I.	Natural convection in a rectangular cavity filled with nanofluids: Effect of variable viscosity	2018	International Journal of Numerical Methods for Heat and Fluid Flow	28	6	NA	1410	1432	NA	NA	10.1108/HFF-06-2017-0244	https://www.scopus.com/inward/record.url?eid=2-s2.0-85050680487&partnerID=40&md5=2951d809e0fe3bb8130fb0edfa11fd44	Article	NA	Scopus	Â© 2018, Emerald Publishing Limited. Purpose: This paper aims to develop a numerical study of the steady natural convection in a rectangular cavity filled with the CuOâ€“water-based nanofluid. It is assumed that the viscosity of nanofluids depends on the temperature and on the nanofluids volume fraction. Design/methodology/approach: The mathematical nanofluid model has been formulated on the basi…	Natural convection in a rectangular cavity filled with nanofluids: Effect of variable viscosity <U+FFFD><U+FFFD> 2018, Emerald Publishing Limited. Purpose: This paper aims to develop a numerical study of the steady natural convection in a rectangular cavity filled with the CuO<U+FFFD><U+FFFD><U+FFFD>water-based nanofluid. It is assumed that the viscosity of nanofluids depends on the temperature a…	All plots presented in the paper are new and are not reported in any other study.	2-s2.0-85050680487	No		not about detections in aquatic environment
151	8028	Dinarvand, S., Hosseini, R., Pop, I.	Homotopy analysis method for unsteady mixed convective stagnation-point flow of a nanofluid using Tiwari-Das nanofluid model	2016	International Journal of Numerical Methods for Heat and Fluid Flow	26	1	NA	40	62	NA	13	10.1108/HFF-12-2014-0387	https://www.scopus.com/inward/record.url?eid=2-s2.0-84951114765&partnerID=40&md5=7d5240bd4a1ad19244c5f7450c580c56	Article	NA	Scopus	Â© Emerald Group Publishing Limited. Purpose - The current study is mainly motivated by the need to the development of the transient MHD mixed convection stagnation-point flow and heat transfer of an electrically conducting nanofluid over a vertical permeable stretching/shrinking sheet by means of Tiwari-Das nanofluid model. The purpose of this paper is to investigate the effects of the parameter…	Homotopy analysis method for unsteady mixed convective stagnation-point flow of a nanofluid using Tiwari-Das nanofluid model <U+FFFD><U+FFFD> Emerald Group Publishing Limited. Purpose - The current study is mainly motivated by the need to the development of the transient MHD mixed convection stagnation-point flow and heat transfer of an electrically conducting nanofluid over a vertical permeable …	All plots presented in the paper are new and did not report in any other study.	2-s2.0-84951114765	no		not about detections in aquatic environment
1367	16335	Bespalov, V.G., Alexandrov, V.A., Vysochina, G.I., Kostikova, V.Ð., Baranenko, D.A.	The inhibiting activity of meadowsweet extract on neurocarcinogenesis induced transplacentally in rats by ethylnitrosourea	2017	Journal of Neuro-Oncology	131	3	NA	459	467	NA	NA	10.1007/s11060-016-2323-6	https://www.scopus.com/inward/record.url?eid=2-s2.0-84994796527&partnerID=40&md5=07525c55857eef00665d8c93f4242618	Article	NA	Scopus	Â© 2016, Springer Science+Business Media New York.Inhibitory activity of a decoction of meadowsweet, given postnatally, was studied in rats at risk for neurogenic and renal tumors initiated by transplacental exposure to ethylnitrosourea (ENU). Chemical analysis of ethanol and aqueous extracts of meadowsweet has shown high content of biologically active flavonoids and tannins. Pregnant rats of LIO…	The inhibiting activity of meadowsweet extract on neurocarcinogenesis induced transplacentally in rats by ethylnitrosourea <U+FFFD><U+FFFD> 2016, Springer Science+Business Media New York.Inhibitory activity of a decoction of meadowsweet, given postnatally, was studied in rats at risk for neurogenic and renal tumors initiated by transplacental exposure to ethylnitrosourea (ENU). Chemical analysis …	All rats of the first group (ENU) developed multiple malignant tumors, which occurred in brain (86%), spinal cord (43%), peripheral and cranial nerves (29%) and in kidney (31%).	2-s2.0-84994796527	No		not about detections in aquatic environment
2549	4402	Shafi, A., Ridgway, H.J., Jaspers, M.V., Jones, E.E.	Conidial production by Botryosphaeriaceae species from grapevine shoot lesions in Marlborough vineyards	2017	New Zealand Plant Protection	70	NA	NA	295	300	NA	1	NA	https://www.scopus.com/inward/record.url?eid=2-s2.0-85027449671&partnerID=40&md5=457b5d2591f6723ee90fd7edadb32a68	Article	NA	Scopus	Â© 2017 New Zealand Plant Protection Society (Inc.). Botryosphaeriaceae species are important pathogens of grapevines so the effect of environmental conditions on sporulation from naturally infected Sauvignon blanc grapevines in two Marlborough vineyards was studied. Shoot lesions characteristic of Botryosphaeriaceae infection were marked on 24 grapevines in each vineyard for observation between …	Conidial production by Botryosphaeriaceae species from grapevine shoot lesions in Marlborough vineyards <U+FFFD><U+FFFD> 2017 New Zealand Plant Protection Society (Inc.). Botryosphaeriaceae species are important pathogens of grapevines so the effect of environmental conditions on sporulation from naturally infected Sauvignon blanc grapevines in two Marlborough vineyards was studied. Shoot lesions…	All species have been reported previously as grapevine pathogens in New Zealand.	2-s2.0-85027449671	No		not about detections in aquatic environment
2984	17819	Marchegiano, M., Gliozzi, E., Ceschin, S., Mazzini, I., Adatte, T., Mazza, R., Gliozzi, S., Ariztegui, D.	Ecology and distribution of living ostracod assemblages in a shallow endorheic lake: The example of Lake Trasimeno (Umbria, Central Italy)	2017	Journal of Limnology	76	3	NA	469	487	NA	3	10.4081/jlimnol.2017.1478	https://www.scopus.com/inward/record.url?eid=2-s2.0-85034976714&partnerID=40&md5=b68be73faffc3aad9ffe558dda4cabdd	Article	Open Access	Scopus	Â© 2017, Page Press Publications. All rights reserved.Ostracod assemblages from Lake Trasimeno (Umbria, central Italy), the largest endorheic lake in Italy, were investigated relating their species distribution and ecology to modern physical, chemical and biological parameters. Nineteen living species were collected in the lake (Darwinula stevensoni, Candona (Candona) candida, Candona (Neglecando…	Ecology and distribution of living ostracod assemblages in a shallow endorheic lake: The example of Lake Trasimeno (Umbria, Central Italy) <U+FFFD><U+FFFD> 2017, Page Press Publications. All rights reserved.Ostracod assemblages from Lake Trasimeno (Umbria, central Italy), the largest endorheic lake in Italy, were investigated relating their species distribution and ecology to modern physical, che…	All the identified species belong to the fresh-water Italian ostracod fauna but Cyprideis torosa is documented in an oligohaline athalassic lacustrine environment in Italy for the first time.	2-s2.0-85034976714	no		new detection in plants
1613	6801	RÄƒdan, S.-C., RÄƒdan, S., Catianis, I., Grosu, D., Scrieciu, A., Pojar, I.	An environmental magneto-lithogenetic study in the lakes of the Gorgova-Uzlina Depression (Danube Delta, Romania). I. Insights from short sediment cores	2016	Geo-Eco-Marina	2016	22	NA	51	74	NA	2	NA	https://www.scopus.com/inward/record.url?eid=2-s2.0-85009453042&partnerID=40&md5=449f8b507097b43464fb2cd47ec0cab9	Article	NA	Scopus	Â© 2016, National Research and Development Institute for Marine Geology and Geoecology. All rights reserved. Magnetic susceptibility (MS) represents a high resolution environmental and lithological (LITHO) proxy tool, which is successfully used for the study of recent sediments in freshwater or marine aquatic environments. The studies that we have achieved in the last 40 years in the Danube-Danub…	An environmental magneto-lithogenetic study in the lakes of the Gorgova-Uzlina Depression (Danube Delta, Romania). I. Insights from short sediment cores <U+FFFD><U+FFFD> 2016, National Research and Development Institute for Marine Geology and Geoecology. All rights reserved. Magnetic susceptibility (MS) represents a high resolution environmental and lithological (LITHO) proxy tool, which is succe…	All these data give new evidences for demonstrating the availabilities of the method used to identify the environmental influences on the magnetic susceptibility of lake sediments, and hence to assess the geoecological state of the deltaic area under attention.	2-s2.0-85009453042	No		not about detections in aquatic environment
3061	364	Nukolova, N.V., Aleksashkin, A.D., Abakumova, T.O., Morozova, A.Y., Gubskiy, I.L., Kirzhanova, Ð•.Ð., Abakumov, M.A., Chekhonin, V.P., Klyachko, N.L., Kabanov, A.V.	Multilayer polyion complex nanoformulations of superoxide dismutase 1 for acute spinal cord injury	2018	Journal of Controlled Release	270	NA	NA	226	236	NA	1	10.1016/j.jconrel.2017.11.044	https://www.scopus.com/inward/record.url?eid=2-s2.0-85038004562&partnerID=40&md5=b79591107a3d806e01b27b9f6ad74abc	Article	NA	Scopus	Â© 2017 Elsevier B.V. As one of the most devastating forms of trauma, spinal cord injury (SCI) remains a challenging clinical problem. The secondary processes associated with the primary injury, such as overproduction of reactive oxygen species (ROS) and inflammation, lead to concomitant compression of the injured spinal cord and neuronal death. Delivery of copper-zinc superoxide dismutase (SOD1)…	Multilayer polyion complex nanoformulations of superoxide dismutase 1 for acute spinal cord injury <U+FFFD><U+FFFD> 2017 Elsevier B.V. As one of the most devastating forms of trauma, spinal cord injury (SCI) remains a challenging clinical problem. The secondary processes associated with the primary injury, such as overproduction of reactive oxygen species (ROS) and inflammation, lead to concomita…	Along with the cross-linked polyion complex of SOD1 with polycation poly(ethylene glycol) (PEG)-polylysine (single-coat (SC) nanozyme), we introduce for the first time the chemically cross-linked multilayer polyion complex in which SOD1 is first incorporated into a polyion complex with polycation, then coated by anionic block copolymer, PEG-polyglutamic acid (double-coat (DC) nanozyme).	2-s2.0-85038004562	no		not about detections in aquatic environment
651	5710	Botana, L.M.	Toxicological Perspective on Climate Change: Aquatic Toxins	2016	Chemical Research in Toxicology	29	4	NA	619	625	NA	13	10.1021/acs.chemrestox.6b00020	https://www.scopus.com/inward/record.url?eid=2-s2.0-84964689347&partnerID=40&md5=7cbd60c45285b2ebb51548a8d78f1455	Review	Open Access	Scopus	Â© 2016 American Chemical Society. In recent years, our group and several others have been describing the presence of new, not previously reported, toxins of high toxicity in vectors that may reach the human food chain. These include tetrodotoxin in gastropods in the South of Europe, ciguatoxin in fish in the South of Spain, palytoxin in mussels in the Mediterranean Sea, pinnatoxin all over Europ…	Toxicological Perspective on Climate Change: Aquatic Toxins <U+FFFD><U+FFFD> 2016 American Chemical Society. In recent years, our group and several others have been describing the presence of new, not previously reported, toxins of high toxicity in vectors that may reach the human food chain. These include tetrodotoxin in gastropods in the South of Europe, ciguatoxin in fish in the South of Spain…	Along with the new toxins, new chemical analogues are being reported.	2-s2.0-84964689347	yes	CH	new toxins?
3182	34	Sianto, L., de Miranda Chaves, S.A., Teixeira-Santos, I., Pereira, P.A., Godinho, R.M., GonÃ§alves, D., Santos, A.L.	Evidence of contact between New and Old World: paleoparasitological and food remains study in the Tagus river population of Sarilhos Grandes (Montijo, Portugal)	2018	Archaeological and Anthropological Sciences	10	1	NA	75	81	NA	1	10.1007/s12520-016-0337-9	https://www.scopus.com/inward/record.url?eid=2-s2.0-85040713778&partnerID=40&md5=162868f505103688faf450aec594e8fc	Article	NA	Scopus	Â© 2016, Springer-Verlag Berlin Heidelberg. The period of European maritime expansion that started in the fifteenth century had a great impact on trading, on human migrations and consequently in the dispersion of infectious diseases. Portugal was at the core of this expansion; however, studies about parasitic infections, especially helminths, are lacking. This study aims to help reduce this gap p…	Evidence of contact between New and Old World: paleoparasitological and food remains study in the Tagus river population of Sarilhos Grandes (Montijo, Portugal) <U+FFFD><U+FFFD> 2016, Springer-Verlag Berlin Heidelberg. The period of European maritime expansion that started in the fifteenth century had a great impact on trading, on human migrations and consequently in the dispersion of infectious …	Also eggs of trichostrongyle type species were identified in two individuals and may represent the first report in archaeological European samples.	2-s2.0-85040713778	No		not about detections in aquatic environment
2346	18493	Cordo, C.A., MÃ³naco, C.I., Altamirano, R., PerellÃ³, A.E., LarrÃ¡n, S., Kripelz, N.I., SimÃ³n, M.R.	Weather Conditions Associated with the Release and Dispersal of Zymoseptoria tritici Spores in the Argentine Pampas Region	2017	International Journal of Agronomy	2017	NA	1468580	NA	NA	NA	1	10.1155/2017/1468580	https://www.scopus.com/inward/record.url?eid=2-s2.0-85021672979&partnerID=40&md5=834054e8b28073fcb3346b4a7a4dc0e6	Article	Open Access	Scopus	Â© 2017 C. A. Cordo et al. The abundance of Zymoseptoria tritici ascospores and conidia in a field was examined throughout two one-year periods (1998-1999 and 1999-2000) establishing the relationship between spore release and weather variables. Radiation, temperature, intensity of rainfall, and relative humidity significantly affected the dispersal of ascospores and pycnidiospores of this pathoge…	Weather Conditions Associated with the Release and Dispersal of Zymoseptoria tritici Spores in the Argentine Pampas Region <U+FFFD><U+FFFD> 2017 C. A. Cordo et al. The abundance of Zymoseptoria tritici ascospores and conidia in a field was examined throughout two one-year periods (1998-1999 and 1999-2000) establishing the relationship between spore release and weather variables. Radiation, temper…	Also for the first time, a positive correlation between radiation and pycnidiospores dispersal is reported.	2-s2.0-85021672979	No		not about detections in aquatic environment
3925	9644	Zhao, J., Hourigan, K., Thompson, M.C.	Flow-induced vibration of D-section cylinders: An afterbody is not essential for vortex-induced vibration	2018	Journal of Fluid Mechanics	851	NA	NA	317	343	NA	1	10.1017/jfm.2018.501	https://www.scopus.com/inward/record.url?eid=2-s2.0-85050609425&partnerID=40&md5=491d9d026ee34f935ebaa806aa9429e8	Article	NA	Scopus	Â© 2018 Cambridge University Press. While it has been known that an afterbody (i.e. the structural part of a bluff body downstream of the flow separation points) plays an important role affecting the wake characteristics and even may change the nature of the flow-induced vibration (FIV) of a structure, the question of whether an afterbody is essential for the occurrence of one particular common f…	Flow-induced vibration of D-section cylinders: An afterbody is not essential for vortex-induced vibration <U+FFFD><U+FFFD> 2018 Cambridge University Press. While it has been known that an afterbody (i.e. the structural part of a bluff body downstream of the flow separation points) plays an important role affecting the wake characteristics and even may change the nature of the flow-induced vibrati…	Also observed for the first time were interesting wake modes associated with these response regimes.	2-s2.0-85050609425	No		not about detections in aquatic environment
1238	20671	Bartolome, R., GÃ³rriz, E., DaÃ±obeitia, J., Cordoba, D., MartÃ­, D., Cameselle, A.L., NÃºÃ±ez-CornÃº, F., Bandy, W.L., Mortera-GutiÃ©rrez, C.A., NuÃ±ez, D., CastellÃ³n, A., Alonso, J.L.	Multichannel Seismic Imaging of the Rivera Plate Subduction at the Seismogenic Jalisco Block Area (Western Mexican Margin)	2016	Pure and Applied Geophysics	173	43414	NA	3575	3594	NA	NA	10.1007/s00024-016-1331-y	https://www.scopus.com/inward/record.url?eid=2-s2.0-84991011086&partnerID=40&md5=f398f3cab7fcaa15eda35a1f1f3c184a	Article	Open Access	Scopus	Â© 2016, The Author(s). During the TSUJAL marine geophysical survey, conducted in February and March 2014, Spanish, Mexican and British scientists and technicians explored the western margin of Mexico, considered one of the most active seismic zones in America. This work aims to characterize the internal structure of the subduction zone of the Rivera plate beneath the North American plate in the …	Multichannel Seismic Imaging of the Rivera Plate Subduction at the Seismogenic Jalisco Block Area (Western Mexican Margin) <U+FFFD><U+FFFD> 2016, The Author(s). During the TSUJAL marine geophysical survey, conducted in February and March 2014, Spanish, Mexican and British scientists and technicians explored the western margin of Mexico, considered one of the most active seismic zones in America. …	Also, a bottom simulating reflector (BSR) is identified in the first half a second (twtt) of the section.	2-s2.0-84991011086	No		not about detections in aquatic environment
1522	4261	Horvat, G., Zagar, D., Vlaovic, J.	Evaluation of quality of service provisioning in large-scale pervasive and smart collaborative wireless sensor and actor networks	2017	Advanced Engineering Informatics	33	NA	NA	258	273	NA	NA	10.1016/j.aei.2016.10.003	https://www.scopus.com/inward/record.url?eid=2-s2.0-85006836427&partnerID=40&md5=1349fefb9a30d1ce54708934bd9dfd0c	Article	NA	Scopus	Â© 2016 Elsevier Ltd With the production of low cost sensors, classical concept of Wireless Sensor Networks (WSNs) evolved into large-scale concept hosting thousands of nodes within a network and generating abundant quantities of data. As these networks are being continuously developed a new class of WSNs are proposed: Wireless Sensor and Actor Networks (WSANs). These networks introduce the actua…	Evaluation of quality of service provisioning in large-scale pervasive and smart collaborative wireless sensor and actor networks <U+FFFD><U+FFFD> 2016 Elsevier Ltd With the production of low cost sensors, classical concept of Wireless Sensor Networks (WSNs) evolved into large-scale concept hosting thousands of nodes within a network and generating abundant quantities of data. As these networks a…	Also, a new relation between hop count and latency based on transmission power is observed, not reported in the available literature, resulting in a new proposed empirical latency model.	2-s2.0-85006836427	No		not about detections in aquatic environment
1577	15792	Lammers, P.J., Huesemann, M., Boeing, W., Anderson, D.B., Arnold, R.G., Bai, X., Bhole, M., Brhanavan, Y., Brown, L., Brown, J., Brown, J.K., Chisholm, S., Meghan Downes, C., Fulbright, S., Ge, Y., Holladay, J.E., Ketheesan, B., Khopkar, A., Koushik, A., Laur, P., Marrone, B.L., Mott, J.B., Nirmalakhandan, N., Ogden, K.L., Parsons, R.L., Polle, J., Ryan, R.D., Samocha, T., Sayre, R.T., Seger, M.,…	Review of the cultivation program within the National Alliance for Advanced Biofuels and Bioproducts	2017	Algal Research	22	NA	NA	166	186	NA	13	10.1016/j.algal.2016.11.021	https://www.scopus.com/inward/record.url?eid=2-s2.0-85008222827&partnerID=40&md5=f249fcd5f3f4729083cdf2f1baf39255	Article	Open Access	Scopus	Â© 2016 The AuthorsThe cultivation efforts within the National Alliance for Advanced Biofuels and Bioproducts (NAABB) were developed to provide four major goals for the consortium, which included biomass production for downstream experimentation, development of new assessment tools for cultivation, development of new cultivation reactor technologies, and development of methods for robust cultivat…	Review of the cultivation program within the National Alliance for Advanced Biofuels and Bioproducts <U+FFFD><U+FFFD> 2016 The AuthorsThe cultivation efforts within the National Alliance for Advanced Biofuels and Bioproducts (NAABB) were developed to provide four major goals for the consortium, which included biomass production for downstream experimentation, development of new assessment tools f…	Also, molecular markers were developed for quality control and to facilitate detection of bacterial communities associated with cultivated algal species, including the Chlorella spp. pathogen, Vampirovibrio chlorellavorus, which was identified in at least two test site locations in Arizona and New Mexico.	2-s2.0-85008222827	No		not about detections in aquatic environment
1136	21165	Yihdego, Y., Al-Weshah, R.A.	Gulf warÂ contamination assessment for optimal monitoring and remediation cost-benefit analysis, Kuwait	2016	Environmental Earth Sciences	75	18	1234	NA	NA	NA	4	10.1007/s12665-016-6025-3	https://www.scopus.com/inward/record.url?eid=2-s2.0-84987621321&partnerID=40&md5=e449829f433337328518db8aae029a1c	Article	NA	Scopus	Â© 2016, Springer-Verlag Berlin Heidelberg. Site characterization was performed on an area of 580 km2 around the strategically vital freshwater aquifers of the Al-Rawdhatain and Umm Al-Aish to assess the status of groundwater pollution as the result of Iraq invasion to Kuwait in 1991. Advanced data analysis and visualization software (EVS-Pro) was used for groundwater contamination assessment ana…	Gulf war<U+FFFD><U+FFFD>contamination assessment for optimal monitoring and remediation cost-benefit analysis, Kuwait <U+FFFD><U+FFFD> 2016, Springer-Verlag Berlin Heidelberg. Site characterization was performed on an area of 580 km2 around the strategically vital freshwater aquifers of the Al-Rawdhatain and Umm Al-Aish to assess the status of groundwater pollution as the result of Iraq invasion …	Also, new sampling locations were determined for further detailed site assessments based on the confidence and uncertainty analysis, which is more defensible and cost-optimized approach.	2-s2.0-84987621321	No		not about detections in aquatic environment
3791	10861	Lastre-Acosta, A.M., Barberato, B., Parizi, M.P.S., Teixeira, A.C.S.C.	Direct and indirect photolysis of the antibiotic enoxacin: kinetics of oxidation by reactive photo-induced species and simulations	2018	Environmental Science and Pollution Research	NA	NA	NA	1	11	NA	NA	10.1007/s11356-018-2555-4	https://www.scopus.com/inward/record.url?eid=2-s2.0-85048783001&partnerID=40&md5=d7289e73d2863452d08aa92f7c6fe8e5	Article in Press	NA	Scopus	Â© 2018 Springer-Verlag GmbH Germany, part of Springer Nature The purpose of this study was to investigate the aqueous phase photochemical behavior of enoxacin (ENO), an antibiotic selected as a model pollutant of emerging concern. The second-order reaction rate constants of ENO with hydroxyl radicals (HOâ—) and singlet oxygen (1O2) were determined at pH 3, 7, and 9. Also, the rate constants of …	Direct and indirect photolysis of the antibiotic enoxacin: kinetics of oxidation by reactive photo-induced species and simulations <U+FFFD><U+FFFD> 2018 Springer-Verlag GmbH Germany, part of Springer Nature The purpose of this study was to investigate the aqueous phase photochemical behavior of enoxacin (ENO), an antibiotic selected as a model pollutant of emerging concern. The second-order react…	Also, the rate constants of the electron transfer reaction between ENO and triplet states of chromophoric dissolved organic matter (3CDOM*) are reported for the first time, based on anthraquinone-2-sulfonate (AQ2S) as CDOM proxy.	2-s2.0-85048783001	No		not about detections in aquatic environment
3635	998	Dellinger, M.J., Olson, J.T., Holub, B.J., Ripley, M.P.	Mercury, Polychlorinated Biphenyls, Selenium, and Fatty Acids in Tribal Fish Harvests of the Upper Great Lakes	2018	Risk Analysis	NA	NA	NA	NA	NA	NA	NA	10.1111/risa.13112	https://www.scopus.com/inward/record.url?eid=2-s2.0-85046822737&partnerID=40&md5=282f0bad63249b8a55875bd9391f0dbb	Article in Press	NA	Scopus	Â© 2018 Society for Risk Analysis. The Chippewa Ottawa Resource Authority monitors fish contaminants in Anishinaabe (Great Lake Native American) tribal fisheries. This article updates previously reported trends in two persistent bioaccumulative toxic (PBT) substances that are the primary contributors to consumption advisory limits for these fish: methylmercury (MeHg) and polychlorinated biphenyls…	Mercury, Polychlorinated Biphenyls, Selenium, and Fatty Acids in Tribal Fish Harvests of the Upper Great Lakes <U+FFFD><U+FFFD> 2018 Society for Risk Analysis. The Chippewa Ottawa Resource Authority monitors fish contaminants in Anishinaabe (Great Lake Native American) tribal fisheries. This article updates previously reported trends in two persistent bioaccumulative toxic (PBT) substances that a…	Also, we report, for the first time, an analysis of nutritional benefit bioindicators and metrics in these same Upper Great Lakes fish harvests: selenium (Se) and omega-3 fatty acids (PUFA-3s).	2-s2.0-85046822737	No		not about detections in aquatic environment
1151	21830	Xu, T., GÃ¯Â¿Â½mez-HernÃ¯Â¿Â½ndez, J.J.	Joint identification of contaminant source location, initial release time, and initial solute concentration in an aquifer via ensemble Kalman filtering	2016	Water Resources Research	52	8	NA	6587	6595	NA	10	10.1002/2016WR019111	https://www.scopus.com/inward/record.url?eid=2-s2.0-84987984454&partnerID=40&md5=a3b717a7a3600b2d46fdb633ffa46ff1	Article	NA	Scopus	Â© 2016. American Geophysical Union. All Rights Reserved. When a contaminant is detected in a drinking well, source location, initial contaminant release time, and initial contaminant concentration are, in many cases, unknown; the responsible party may have disappeared and the identification of when and where the contamination happened may become difficult. Although contaminant source identificat…	Joint identification of contaminant source location, initial release time, and initial solute concentration in an aquifer via ensemble Kalman filtering <U+FFFD><U+FFFD> 2016. American Geophysical Union. All Rights Reserved. When a contaminant is detected in a drinking well, source location, initial contaminant release time, and initial contaminant concentration are, in many cases, unknown; the re…	Although contaminant source identification has been studied extensively in the last decades, we propose<U+FFFD><U+FFFD><U+FFFD>to our knowledge, for the first time<U+FFFD><U+FFFD><U+FFFD>the use of the ensemble Kalman filter (EnKF), which has proven to be a powerful algorithm for inverse modeling.	2-s2.0-84987984454	No		not about detections in aquatic environment
838	4847	Johnson, N.W., Mitchell, C.P.J., Engstrom, D.R., Bailey, L.T., Coleman Wasik, J.K., Berndt, M.E.	Methylmercury production in a chronically sulfate-impacted sub-boreal wetland	2016	Environmental Science: Processes and Impacts	18	6	NA	725	734	NA	4	10.1039/c6em00138f	https://www.scopus.com/inward/record.url?eid=2-s2.0-84975217433&partnerID=40&md5=027de487ee4a12a31e0512ef5c5ddee3	Article	NA	Scopus	Â© 2016 The Royal Society of Chemistry. Increased deposition of atmospheric sulfate exacerbates methylmercury (MeHg) production in freshwater wetlands by stimulating methylating bacteria, but it is unclear how methylation in sub-boreal wetlands is impacted by chronically elevated sulfate inputs, such as through mine discharges. The purpose of our study is to determine how sulfate discharges to we…	Methylmercury production in a chronically sulfate-impacted sub-boreal wetland <U+FFFD><U+FFFD> 2016 The Royal Society of Chemistry. Increased deposition of atmospheric sulfate exacerbates methylmercury (MeHg) production in freshwater wetlands by stimulating methylating bacteria, but it is unclear how methylation in sub-boreal wetlands is impacted by chronically elevated sulfate inputs, such as th…	Although continued research is required to determine how sulfate-limited freshwater wetlands might respond to new, large inputs of high-sulfate runoff from mining operations, chronically impacted wetlands do not appear to continually accumulate or produce MeHg at rates different from wetlands unimpacted by mining.	2-s2.0-84975217433	No		not about detections in aquatic environment
2106	1862	Lovy, J., Dicarlo-Emery, D., Hutcheson, J.M.	A bacterium with close genetic identity to Pseudomonas mandelii associated with spring fish kills in wild bluegill Lepomis macrochirus Rafinesque and pumpkinseed sunfish Lepomis gibbosus (Linnaeus)	2017	Journal of Fish Diseases	40	12	NA	1757	1764	NA	NA	10.1111/jfd.12642	https://www.scopus.com/inward/record.url?eid=2-s2.0-85018997603&partnerID=40&md5=2b7649598ba45b1260ffeed2bfad8548	Article	NA	Scopus	Â© 2017 John Wiley & Sons Ltd Pseudomonas fluorescens are known bacterial pathogens in fish. The P. fluorescens group contains at least nine different bacterial species, although species from fish have rarely been differentiated. Two isolated fish kills affecting wild bluegills, Lepomis macrochirus Rafinesque, and pumpkinseed sunfish, Lepomis gibbosus (Linnaeus), occurred in the spring of 2015 du…	A bacterium with close genetic identity to Pseudomonas mandelii associated with spring fish kills in wild bluegill Lepomis macrochirus Rafinesque and pumpkinseed sunfish Lepomis gibbosus (Linnaeus) <U+FFFD><U+FFFD> 2017 John Wiley & Sons Ltd Pseudomonas fluorescens are known bacterial pathogens in fish. The P. fluorescens group contains at least nine different bacterial species, although species …	Although likely widespread in the aquatic environment, this is the first report of a bacterium closely resembling P. mandelii infecting and causing disease in fish.	2-s2.0-85018997603	yes	MB	new detection in biota
1690	14378	Silkina, A., Nelson, G.D., Bayliss, C.E., Pooley, C.L., Day, J.G.	Bioremediation efficacyâ€”comparison of nutrient removal from an anaerobic digest waste-based medium by an algal consortium before and after cryopreservation	2017	Journal of Applied Phycology	29	3	NA	1331	1341	NA	3	10.1007/s10811-017-1066-x	https://www.scopus.com/inward/record.url?eid=2-s2.0-85011708029&partnerID=40&md5=3ab0f5b0e1ec98d35e309137ebe3f555	Article	Open Access	Scopus	Â© 2017, The Author(s).An algal consortium was isolated from an integrated steelmaking site at TATA Steel Strip Products Ltd. in Port Talbot, UK, and its bioremediation capacity tested. Excellent â€œbioremediationâ€ was observed when the mixed culture was â€œappliedâ€ to diluted effluent from an enhanced anaerobic digestion plant at DÅµr Cymru Welsh Water at Port Talbot, UK. After 5 days of cul…	Bioremediation efficacy<U+FFFD><U+FFFD><U+FFFD>comparison of nutrient removal from an anaerobic digest waste-based medium by an algal consortium before and after cryopreservation <U+FFFD><U+FFFD> 2017, The Author(s).An algal consortium was isolated from an integrated steelmaking site at TATA Steel Strip Products Ltd. in Port Talbot, UK, and its bioremediation capacity tested. Excellent <U+FFFD><U…	Although non-axenic algal cultures have previously been cryopreserved, this is the first report of the successful cryopreservation of mixed algal consortium, with validation of its ability to bioremediate after thawing comparing non-cryopreserved cultures with a revived post-thaw algal consortium.	2-s2.0-85011708029	No		not about detections in aquatic environment
1305	7146	Goletti, D., Petruccioli, E., Joosten, S.A., Ottenhoff, T.H.	Tuberculosis biomarkers: From diagnosis to protection	2016	Infectious Disease Reports	8	2	NA	24	32	NA	37	10.4081/idr.2016.6568	https://www.scopus.com/inward/record.url?eid=2-s2.0-84992745426&partnerID=40&md5=aae23e78bdfb4dd3eee2cd202e53cb8e	Article	NA	Scopus	Â© D. Goletti et al., 2016. New approaches to control tuberculosis (TB) worldwide are needed. In particular, new tools for diagnosis and new biomarkers are required to evaluate both pathogen and host key elements of the response to infection. Non-sputum based diagnostic tests, biomarkers predictive of adequate responsiveness to treatment, and biomarkers of risk of developing active TB disease are…	Tuberculosis biomarkers: From diagnosis to protection <U+FFFD><U+FFFD> D. Goletti et al., 2016. New approaches to control tuberculosis (TB) worldwide are needed. In particular, new tools for diagnosis and new biomarkers are required to evaluate both pathogen and host key elements of the response to infection. Non-sputum based diagnostic tests, biomarkers predictive of adequate responsiveness to t…	Although reports on new candidate biomarkers are numerous, validation and independent confirmation are rare.	2-s2.0-84992745426	no		not about detections in aquatic environment
1087	20836	Heath, C., Gillen, C.M., Chrysanthopoulos, P., Walker, M.J., Barnes, A.C.	Streptococcus iniae cpsG alters capsular carbohydrate composition and is a cause of serotype switching in vaccinated fish	2016	Veterinary Microbiology	193	NA	NA	116	124	NA	1	10.1016/j.vetmic.2016.08.011	https://www.scopus.com/inward/record.url?eid=2-s2.0-84983548349&partnerID=40&md5=cd4322faf3b8c781d88dca15d084726e	Article	NA	Scopus	Â© 2016 Streptococcus iniae causes septicaemia and meningitis in marine and freshwater fish wherever they are farmed in warm-temperate and tropical regions. Although serotype specific, vaccination with bacterins (killed bacterial cultures) is largely successful and vaccine failure occurs only occasionally through emergence of new capsular serotypes. Previously we showed that mutations in vaccine …	Streptococcus iniae cpsG alters capsular carbohydrate composition and is a cause of serotype switching in vaccinated fish <U+FFFD><U+FFFD> 2016 Streptococcus iniae causes septicaemia and meningitis in marine and freshwater fish wherever they are farmed in warm-temperate and tropical regions. Although serotype specific, vaccination with bacterins (killed bacterial cultures) is largely successful a…	Although serotype specific, vaccination with bacterins (killed bacterial cultures) is largely successful and vaccine failure occurs only occasionally through emergence of new capsular serotypes.	2-s2.0-84983548349	No		not about detections in aquatic environment
2215	15061	Liu, W., Dai, X., Bai, Z., Wang, Y., Yang, Z., Zhang, L., Xu, L., Chen, L., Li, Y., Gui, D., Diwu, J., Wang, J., Zhou, R., Chai, Z., Wang, S.	Highly Sensitive and Selective Uranium Detection in Natural Water Systems Using a Luminescent Mesoporous Metal-Organic Framework Equipped with Abundant Lewis Basic Sites: A Combined Batch, X-ray Absorption Spectroscopy, and First Principles Simulation Investigation	2017	Environmental Science and Technology	51	7	NA	3911	3921	NA	47	10.1021/acs.est.6b06305	https://www.scopus.com/inward/record.url?eid=2-s2.0-85019994588&partnerID=40&md5=122119bc2a814c6f05e612de77f03481	Article	NA	Scopus	Â© 2017 American Chemical Society. Uranium is not only a strategic resource for the nuclear industry but also a global contaminant with high toxicity. Although several strategies have been established for detecting uranyl ions in water, searching for new uranium sensor material with great sensitivity, selectivity, and stability remains a challenge. We introduce here a hydrolytically stable mesopo…	Highly Sensitive and Selective Uranium Detection in Natural Water Systems Using a Luminescent Mesoporous Metal-Organic Framework Equipped with Abundant Lewis Basic Sites: A Combined Batch, X-ray Absorption Spectroscopy, and First Principles Simulation Investigation <U+FFFD><U+FFFD> 2017 American Chemical Society. Uranium is not only a strategic resource for the nuclear industry but also a global …	Although several strategies have been established for detecting uranyl ions in water, searching for new uranium sensor material with great sensitivity, selectivity, and stability remains a challenge.	2-s2.0-85019994588	No		new identification method
3862	10153	Jardine, C.M., Parmley, E.J., Buchanan, T., Nituch, L., Ojkic, D.	Avian metapneumovirus subtype C in Wild Waterfowl in Ontario, Canada	2018	Transboundary and Emerging Diseases	65	4	NA	1098	1102	NA	NA	10.1111/tbed.12832	https://www.scopus.com/inward/record.url?eid=2-s2.0-85049575719&partnerID=40&md5=a9b7ec4d09f10758d16e7669b525ff37	Article	NA	Scopus	Â© 2018 Blackwell Verlag GmbH Avian metapneumovirus (aMPV) is an emerging poultry pathogen that has a significant economic impact on poultry production worldwide. The geographic range of the virus continues to expand, and wild birds have been implicated as reservoirs of aMPV that have the potential to spread the virus over long distances. Our objective was to determine the apparent prevalence of …	Avian metapneumovirus subtype C in Wild Waterfowl in Ontario, Canada <U+FFFD><U+FFFD> 2018 Blackwell Verlag GmbH Avian metapneumovirus (aMPV) is an emerging poultry pathogen that has a significant economic impact on poultry production worldwide. The geographic range of the virus continues to expand, and wild birds have been implicated as reservoirs of aMPV that have the potential to spread the vi…	Although subtype C aMPV has been detected in a variety of wild birds in North America, this is the first report of aMPV in wild ducks in Ontario, Canada.	2-s2.0-85049575719	No		duck is not aquatic??
3450	9994	Ponce-Robles, L., Oller, I., AgÃ¼era, A., Trinidad-Lozano, M.J., Yuste, F.J., Malato, S., Perez-Estrada, L.A.	Application of a multivariate analysis method for non-target screening detection of persistent transformation products during the cork boiling wastewater treatment	2018	Science of the Total Environment	633	NA	NA	508	517	NA	1	10.1016/j.scitotenv.2018.03.179	https://www.scopus.com/inward/record.url?eid=2-s2.0-85044476189&partnerID=40&md5=70eaab3bfac62de9bd4a258717783c90	Article	NA	Scopus	Â© 2018 Elsevier B.V. Cork boiling wastewater is a very complex mixture of naturally occurring compounds leached and partially oxidized during the boiling cycles. The effluent generated is recalcitrant and could cause a significant environmental impact. Moreover, if this untreated industrial wastewater enters a municipal wastewater treatment plant it could hamper or reduce the efficiency of most …	Application of a multivariate analysis method for non-target screening detection of persistent transformation products during the cork boiling wastewater treatment <U+FFFD><U+FFFD> 2018 Elsevier B.V. Cork boiling wastewater is a very complex mixture of naturally occurring compounds leached and partially oxidized during the boiling cycles. The effluent generated is recalcitrant and could cause a s…	Although, most of the signal intensities were reduced after the treatment line, 16 and 4 new peaks were detected to be formed after C/F and PhF processes respectively.	2-s2.0-85044476189	No		not about detections in aquatic environment
2765	2966	Jama, N.A., Wilford, A., Masango, Z., Haskins, L., Coutsoudis, A., Spies, L., Horwood, C.	Enablers and barriers to success among mothers planning to exclusively breastfeed for six months: A qualitative prospective cohort study in KwaZulu-Natal, South Africa	2017	International Breastfeeding Journal	12	1	43	NA	NA	NA	2	10.1186/s13006-017-0135-8	https://www.scopus.com/inward/record.url?eid=2-s2.0-85030567505&partnerID=40&md5=213aeeb23dcb19c858200a84aa50fd96	Article	NA	Scopus	Â© 2017 The Author(s). Background: Exclusive breastfeeding (EBF) for the first six months of life is the most important determinant of child health and development, and is the recommended feeding practice for all mothers. However, EBF rates remain low in South Africa. This study aimed to prospectively explore enablers or barriers to success among mothers who planned to exclusively breastfeed thei…	Enablers and barriers to success among mothers planning to exclusively breastfeed for six months: A qualitative prospective cohort study in KwaZulu-Natal, South Africa <U+FFFD><U+FFFD> 2017 The Author(s). Background: Exclusive breastfeeding (EBF) for the first six months of life is the most important determinant of child health and development, and is the recommended feeding practice for all moth…	Among 22 mothers who planned to exclusively breastfeed for six months, 17 reported adding other food or fluids before six months, and five reported exclusively breastfeeding successfully for the first six months.	2-s2.0-85030567505	no		not about detections in aquatic environment
778	4889	Herrera, J.M., Rubio, G., HÃ¤ner, L.L., Delgado, J.A., Lucho-Constantino, C.A., Islas-Valdez, S., Pellet, D.	Emerging and established technologies to increase nitrogen use efficiency of cereals	2016	Agronomy	6	2	25	NA	NA	NA	11	10.3390/agronomy6020025	https://www.scopus.com/inward/record.url?eid=2-s2.0-84971635396&partnerID=40&md5=67c5ff36cd084f64bfe79c3807dccbfc	Review	Open Access	Scopus	Â© 2016 by the authors. Nitrogen (N) fertilizers are one of the most expensive inputs in agricultural settings. Additionally, the loss of N increases costs, contributes to soil acidification, and causes off-site pollution of the air, groundwater and waterways. This study reviews current knowledge about technologies for N fertilization with potential to increase N use efficiency and reduce its neg…	Emerging and established technologies to increase nitrogen use efficiency of cereals <U+FFFD><U+FFFD> 2016 by the authors. Nitrogen (N) fertilizers are one of the most expensive inputs in agricultural settings. Additionally, the loss of N increases costs, contributes to soil acidification, and causes off-site pollution of the air, groundwater and waterways. This study reviews current knowledge ab…	Among potential new technologies we identified the incipient development of nanofertilizers, nutrient formulations to coat seeds, and recycled nutrients.	2-s2.0-84971635396	No		not about detections in aquatic environment
3678	11210	Rocha, S.C.O., Lopez-Lastra, C.C., Marano, A.V., de Souza, J.I., Rueda-PÃ¡ramo, M.E., Pires-Zottarelli, C.L.A.	New phylogenetic insights into Saprolegniales (Oomycota, Straminipila) based upon studies of specimens isolated from Brazil and Argentina	2018	Mycological Progress	17	6	NA	691	700	NA	NA	10.1007/s11557-018-1381-x	https://www.scopus.com/inward/record.url?eid=2-s2.0-85047440724&partnerID=40&md5=886b8ae94711fc5147d70ccfb5314e83	Article	NA	Scopus	Â© 2018, German Mycological Society and Springer-Verlag GmbH Germany, part of Springer Nature. Saprolegniales is a complex and monophyletic order of oomycetes. Their members inhabit terrestrial, freshwater, and marine ecosystems and have a worldwide distribution. In these ecosystems, they are found as saprobes, parasites, or even pathogens of animals and plants of economic importance. In this stu…	New phylogenetic insights into Saprolegniales (Oomycota, Straminipila) based upon studies of specimens isolated from Brazil and Argentina <U+FFFD><U+FFFD> 2018, German Mycological Society and Springer-Verlag GmbH Germany, part of Springer Nature. Saprolegniales is a complex and monophyletic order of oomycetes. Their members inhabit terrestrial, freshwater, and marine ecosystems and have a worldwi…	Among the sequenced species, Achlya orion, Leptolegnia eccentrica, Phragmosporangium uniseriatum, and Pythiopsis irregularis are included for the first time in a phylogeny.	2-s2.0-85047440724	No		not about detections in aquatic environment
3072	2132	Kushniruk, I., Schirmer, T., Bensby, T.	Kinematic structures of the solar neighbourhood revealed by Gaia DR1/TGAS and RAVE	2017	Astronomy and Astrophysics	608	NA	A73	NA	NA	NA	1	10.1051/0004-6361/201731147	https://www.scopus.com/inward/record.url?eid=2-s2.0-85038213694&partnerID=40&md5=e5e445ce8e5592ad3a22ad6aa377e39b	Article	NA	Scopus	Â© ESO 2017.Context. The velocity distribution of stars in the solar neighbourhood is inhomogeneous and rich with stellar streams and kinematic structures. These may retain important clues regarding the formation and dynamical history of the Milky Way. However, the nature and origin of many of the streams and structures is unclear, hindering our understanding of how the Milky Way formed and evolv…	Kinematic structures of the solar neighbourhood revealed by Gaia DR1/TGAS and RAVE <U+FFFD><U+FFFD> ESO 2017.Context. The velocity distribution of stars in the solar neighbourhood is inhomogeneous and rich with stellar streams and kinematic structures. These may retain important clues regarding the formation and dynamical history of the Milky Way. However, the nature and origin of many of the str…	Among them we identified well-known groups (such as Hercules, Sirius, Coma Berenices, Pleiades, and Wolf 630), confirmed recently detected groups (such as Antoja12 and Bobylev16), and detected a new structure at (U; V) <U+FFFD><U+FFFD><U+FFFD> (37; 8) km s-1.	2-s2.0-85038213694	no		not about detections in aquatic environment
1714	16776	Yin, K., Li, F., Wang, Y., He, Q., Deng, Y., Chen, S., Liu, C.	Oxidative transformation of artificial sweetener acesulfame by permanganate: Reaction kinetics, transformation products and pathways, and ecotoxicity	2017	Journal of Hazardous Materials	330	NA	NA	52	60	NA	6	10.1016/j.jhazmat.2017.02.012	https://www.scopus.com/inward/record.url?eid=2-s2.0-85012273901&partnerID=40&md5=46f67b4edfa3e922c82363ed9ce546d5	Article	NA	Scopus	Â© 2017 Elsevier B.V. Acesulfame has attracted much attention due to its wide application, environmental persistence and potential safety risk of transformation products (TPs). Little information is known on acesulfame transformation in the presence of oxidants/disinfectants. The acesulfame oxidation by permanganate (Mn(VII)) in water under environmentally relevant conditions was systematically e…	Oxidative transformation of artificial sweetener acesulfame by permanganate: Reaction kinetics, transformation products and pathways, and ecotoxicity <U+FFFD><U+FFFD> 2017 Elsevier B.V. Acesulfame has attracted much attention due to its wide application, environmental persistence and potential safety risk of transformation products (TPs). Little information is known on acesulfame transformation i…	Among them, five TPs were for the first time identified.	2-s2.0-85012273901	Yes	CH	new TPS
1216	7566	Brito, G.R.R., Kirwan, G.M., Assis, C.P., Firme, D.H., Figueira, D.M., Buainain, N., Raposo, M.A.	A collection of birds from Presidente Kennedy and adjacent areas, Tocantins: A further contribution to knowledge of Amazonian avifauna between the Araguaia and Tocantins rivers	2016	Revista Brasileira de Ornitologia	24	2	NA	168	184	NA	NA	NA	https://www.scopus.com/inward/record.url?eid=2-s2.0-84990063318&partnerID=40&md5=aae92f01d9efa9fde9c79ce632096dec	Article	NA	Scopus	Â© 2016, Sociedade Brasileira de Ornitologia. All rights reserved. We report on a collection of birds made at a study site in Presidente Kennedy, midway between the Araguaia and Tocantins Rivers, in north-central Tocantins state, Brazil. Interesting records are presented for 22 species, most of them principally Amazonian taxa with comparatively few previous records for the state of Tocantins, and…	A collection of birds from Presidente Kennedy and adjacent areas, Tocantins: A further contribution to knowledge of Amazonian avifauna between the Araguaia and Tocantins rivers <U+FFFD><U+FFFD> 2016, Sociedade Brasileira de Ornitologia. All rights reserved. We report on a collection of birds made at a study site in Presidente Kennedy, midway between the Araguaia and Tocantins Rivers, in north-cen…	Among them, we report the first specimen records for Tocantins of hybrids/intermediaries Pyrrhura parakeets of the <U+FFFD><U+FFFD><U+FFFD>P. perlata-coerulescens<U+FFFD><U+FFFD><U+FFFD> complex (which was common at our study site), Pearly-breasted Cuckoo Coccyzus euleri, Yellow-billed Cuckoo C. americanus, Rufous-tailed Flatbill Ramphotrigon ruficauda and Sooty Grassquit Tiaris fuliginosus.	2-s2.0-84990063318	no		not about detections in aquatic environment
904	20374	Bei, E., Liao, X., Meng, X., Li, S., Wang, J., Sheng, D., Chao, M., Chen, Z., Zhang, X., Chen, C.	Identification of nitrosamine precursors from urban drainage during storm events: A case study in southern China	2016	Chemosphere	160	NA	NA	323	331	NA	4	10.1016/j.chemosphere.2016.06.081	https://www.scopus.com/inward/record.url?eid=2-s2.0-84978120456&partnerID=40&md5=50fb4ea3f84caea50447f8e55c4a5eba	Article	NA	Scopus	Â© 2016 Elsevier Ltd The drinking water sources of many cities in southern China are frequently contaminated by upstream urban drainage during storm events, which brings high concentrations of N-nitrosamine (NA) precursors and poses a threat to the safety of drinking water. We conducted two sampling campaigns during the heavy rain season in 2015 in one representative city in southern China. We de…	Identification of nitrosamine precursors from urban drainage during storm events: A case study in southern China <U+FFFD><U+FFFD> 2016 Elsevier Ltd The drinking water sources of many cities in southern China are frequently contaminated by upstream urban drainage during storm events, which brings high concentrations of N-nitrosamine (NA) precursors and poses a threat to the safety of drinking wate…	Among these NA precursors, Ziram was identified for the first time as a NA precursor that is formed via chloramination; its molar yield for NDMA was 6.73 <U+FFFD><U+FFFD> 0.40%.	2-s2.0-84978120456	Yes	CH	new precursor
1002	7023	Deng, Y., Wu, Y., Jiang, L., Tan, A., Zhang, R., Luo, L.	Multi-drug resistance mediated by class 1 integrons in Aeromonas isolated from farmed freshwater animals	2016	Frontiers in Microbiology	7	JUN	935	NA	NA	NA	3	10.3389/fmicb.2016.00935	https://www.scopus.com/inward/record.url?eid=2-s2.0-84980018557&partnerID=40&md5=b05f716d256aeafa9a17ef65cba7cc24	Article	NA	Scopus	Â© 2016 Deng, Wu, Jiang, Tan, Zhang and Luo.Aeromonas is regarded as an important pathogen of freshwater animals but little is known about the genetics of its antimicrobial resistance in Chinese aquaculture. The aim of this study was to investigate the presence of integrons and characterize multidrug resistant Aeromonas spp. isolated from diseased farmed freshwater animals. These animal samples i…	Multi-drug resistance mediated by class 1 integrons in Aeromonas isolated from farmed freshwater animals <U+FFFD><U+FFFD> 2016 Deng, Wu, Jiang, Tan, Zhang and Luo.Aeromonas is regarded as an important pathogen of freshwater animals but little is known about the genetics of its antimicrobial resistance in Chinese aquaculture. The aim of this study was to investigate the presence of integrons and c…	Among these, drfA12-orfF-aadA2 was the dominant gene cassette array (63.6%, 14/22) and this is the first report of aac(6')-II-blaOXA-21-cat3 in an Aeromonas hydrophila isolate from a Chinese giant salamander (Andrias davidianus).	2-s2.0-84980018557	yes	MB	salamander aquatic?
2663	2576	Drzyzga, D., Lipok, J.	Analytical insight into degradation processes of aminopolyphosphonates as potential factors that induce cyanobacterial blooms	2017	Environmental Science and Pollution Research	24	31	NA	24364	24375	NA	NA	10.1007/s11356-017-0068-1	https://www.scopus.com/inward/record.url?eid=2-s2.0-85028986316&partnerID=40&md5=6dc24379f0617a57e222f26148b7a330	Article	Open Access	Scopus	Â© 2017, The Author(s). Aminopolyphosphonates (AAPs) are commonly used industrial complexones of metal ions, which upon the action of biotic and abiotic factors undergo a breakdown and release their substructures. Despite the low toxicity of AAPs towards vertebrates, products of their transformations, especially those that contain phosphorus and nitrogen, can affect algal communities. To verify w…	Analytical insight into degradation processes of aminopolyphosphonates as potential factors that induce cyanobacterial blooms <U+FFFD><U+FFFD> 2017, The Author(s). Aminopolyphosphonates (AAPs) are commonly used industrial complexones of metal ions, which upon the action of biotic and abiotic factors undergo a breakdown and release their substructures. Despite the low toxicity of AAPs towards vert…	Among those substances, N-(methylamino)methanephosphonic acid (MAMPA) was identified for the first time as the product of decomposition of the examined aminopolyphosphonates.	2-s2.0-85028986316	yes	CH	new identification
3281	11904	Alvito, A., Bellodi, A., Cau, A., Moccia, D., Mulas, A., Palmas, F., Pesci, P., Follesa, M.C.	Amount and distribution of benthic marine litter along Sardinian fishing grounds (CW Mediterranean Sea)	2018	Waste Management	75	NA	NA	131	140	NA	1	10.1016/j.wasman.2018.02.026	https://www.scopus.com/inward/record.url?eid=2-s2.0-85042125626&partnerID=40&md5=fbb436b558c5772ced8cb53d320b97b9	Article	NA	Scopus	Â© 2018 Elsevier Ltd Reports of marine litter pollution first appeared in scientific literature of the early 1970s; yet, more than 40 years later, no rigorous estimates exist of the amount of litter existing in the marine environment. To cope with this global urgency, this study reports the status of marine litter abundance along fishing grounds surrounding the island of Sardinia (CW Mediterranea…	Amount and distribution of benthic marine litter along Sardinian fishing grounds (CW Mediterranean Sea) <U+FFFD><U+FFFD> 2018 Elsevier Ltd Reports of marine litter pollution first appeared in scientific literature of the early 1970s; yet, more than 40 years later, no rigorous estimates exist of the amount of litter existing in the marine environment. To cope with this global urgency, this study r…	Amount and distribution of benthic marine litter along Sardinian fishing grounds (CW Mediterranean Sea) <U+FFFD><U+FFFD> 2018 Elsevier Ltd Reports of marine litter pollution first appeared in scientific literature of the early 1970s; yet, more than 40 years later, no rigorous estimates exist of the amount of litter existing in the marine environment.	2-s2.0-85042125626	No		not about detections in aquatic environment
74	6627	Chiogna, G., Majone, B., Cano Paoli, K., Diamantini, E., Stella, E., Mallucci, S., Lencioni, V., Zandonai, F., Bellin, A.	A review of hydrological and chemical stressors in the Adige catchment and its ecological status	2016	Science of the Total Environment	540	NA	NA	429	443	NA	27	10.1016/j.scitotenv.2015.06.149	https://www.scopus.com/inward/record.url?eid=2-s2.0-84945450001&partnerID=40&md5=243d610e6d909fc9f1c8bed59cd069db	Article	Open Access	Scopus	Â© 2015. Quantifying the effects of multiple stressors on Alpine freshwater ecosystems is challenging, due to the lack of tailored field campaigns for the contemporaneous measurement of hydrological, chemical and ecological parameters. Conducting exhaustive field campaigns is costly and hence most of the activities so far have been performed addressing specific environmental issues. An accurate a…	A review of hydrological and chemical stressors in the Adige catchment and its ecological status <U+FFFD><U+FFFD> 2015. Quantifying the effects of multiple stressors on Alpine freshwater ecosystems is challenging, due to the lack of tailored field campaigns for the contemporaneous measurement of hydrological, chemical and ecological parameters. Conducting exhaustive field campaigns is costly and …	An accurate analysis of existing information is therefore useful and necessary, to identify stressors that may act in synergy and to design new field campaigns.	2-s2.0-84945450001	No		not about detections in aquatic environment
3658	9815	NÃºÃ±ez, C., Arancibia, V., TriviÃ±o, J.J.	A new strategy for the modification of a carbon paste electrode with carrageenan hydrogel for a sensitive and selective determination of arsenic in natural waters	2018	Talanta	187	NA	NA	259	264	NA	NA	10.1016/j.talanta.2018.05.028	https://www.scopus.com/inward/record.url?eid=2-s2.0-85047185760&partnerID=40&md5=61b7c89e504ea573e0c1ca1413f49113	Article	NA	Scopus	Â© 2018 Elsevier B.V. An adsorptive stripping voltammetric method for the determination of As(III) and Astotal in water samples using a carrageenan modified carbon paste electrode is presented for the first time (CARâˆ’CPE). The modified electrode was prepared in different ways: by adding CAR in solid form or as a hydrogel together with graphite and paraffin, as well as adsorbing CAR by applying …	A new strategy for the modification of a carbon paste electrode with carrageenan hydrogel for a sensitive and selective determination of arsenic in natural waters <U+FFFD><U+FFFD> 2018 Elsevier B.V. An adsorptive stripping voltammetric method for the determination of As(III) and Astotal in water samples using a carrageenan modified carbon paste electrode is presented for the first time (CAR<U+FFF…	An adsorptive stripping voltammetric method for the determination of As(III) and Astotal in water samples using a carrageenan modified carbon paste electrode is presented for the first time (CAR<U+FFFD><U+FFFD><U+FFFD>CPE).	2-s2.0-85047185760	No		not about detections in aquatic environment
2352	14610	Arantes De Carvalho, G.G., Oliveira, P.V., Yang, L.	Determination of europium isotope ratios in natural waters by MC-ICP-MS	2017	Journal of Analytical Atomic Spectrometry	32	5	NA	987	995	NA	4	10.1039/c7ja00020k	https://www.scopus.com/inward/record.url?eid=2-s2.0-85021699225&partnerID=40&md5=aedcbda6d08d0525455834c3e6a811b3	Article	NA	Scopus	Â© 2017 The Royal Society of Chemistry. An analytical protocol for the accurate and precise determination of the europium isotope ratio in low level natural waters is presented for the first time by using multi-collector inductively coupled plasma mass spectrometry (MC-ICP-MS). Parameters affecting the separation of Eu from the matrix by employing a single-step column separation with di(2-ethylhe…	Determination of europium isotope ratios in natural waters by MC-ICP-MS <U+FFFD><U+FFFD> 2017 The Royal Society of Chemistry. An analytical protocol for the accurate and precise determination of the europium isotope ratio in low level natural waters is presented for the first time by using multi-collector inductively coupled plasma mass spectrometry (MC-ICP-MS). Parameters affecting the separatio…	An analytical protocol for the accurate and precise determination of the europium isotope ratio in low level natural waters is presented for the first time by using multi-collector inductively coupled plasma mass spectrometry (MC-ICP-MS).	2-s2.0-85021699225	No		new identification method
3502	13092	Kotthoff, M., RÃ¼del, H., JÃ¼rling, H., Severin, K., Hennecke, S., Friesen, A., Koschorreck, J.	First evidence of anticoagulant rodenticides in fish and suspended particulate matter: spatial and temporal distribution in German freshwater aquatic systems	2018	Environmental Science and Pollution Research	NA	NA	NA	1	11	NA	NA	10.1007/s11356-018-1385-8	https://www.scopus.com/inward/record.url?eid=2-s2.0-85045140433&partnerID=40&md5=1f70fe4806d53c9dd972ac9cb1f5a518	Article in Press	Open Access	Scopus	Â© 2018 The Author(s) Anticoagulant rodenticides (ARs) have been used for decades for rodent control worldwide. Research on the exposure of the environment and accumulation of these active substances in biota has been focused on terrestrial food webs, but few data are available on the impact of ARs on aquatic systems and water organisms. To fill this gap, we analyzed liver samples of bream (Abram…	First evidence of anticoagulant rodenticides in fish and suspended particulate matter: spatial and temporal distribution in German freshwater aquatic systems <U+FFFD><U+FFFD> 2018 The Author(s) Anticoagulant rodenticides (ARs) have been used for decades for rodent control worldwide. Research on the exposure of the environment and accumulation of these active substances in biota has been focused o…	An appropriate method was developed for the determination of eight different ARs, including first- and second-generation ARs, in fish liver and SPM.	2-s2.0-85045140433	No		new identification method
2851	697	Chang, J.-S., Yoon, I.-H., Kim, K.-W.	Arsenic biotransformation potential of microbial arsH responses in the biogeochemical cycling of arsenic-contaminated groundwater	2018	Chemosphere	191	NA	NA	729	737	NA	NA	10.1016/j.chemosphere.2017.10.044	https://www.scopus.com/inward/record.url?eid=2-s2.0-85031994573&partnerID=40&md5=52f2790bed7e375858006619189f64fc	Article	NA	Scopus	Â© 2017 Elsevier Ltd ArsH encodes an oxidoreductase, an NAD(P)H-dependent mononucleotide reductase, with an unknown function, frequently within an ars operon, and is widely distributed in bacteria. Novel arsenite-oxidizing bacteria have been isolated from arsenic-contaminated groundwater and surface soil in Vietnam. We found that ArsH gene activity, with arsenite oxidase in the periplasm; it reve…	Arsenic biotransformation potential of microbial arsH responses in the biogeochemical cycling of arsenic-contaminated groundwater <U+FFFD><U+FFFD> 2017 Elsevier Ltd ArsH encodes an oxidoreductase, an NAD(P)H-dependent mononucleotide reductase, with an unknown function, frequently within an ars operon, and is widely distributed in bacteria. Novel arsenite-oxidizing bacteria have been isolated from…	An arsH gene encoding an organoarsenical oxidase protein was observed in arsenite-oxidizing Citrobacter freundii strain VTan4 (DQ481466), whereas arsB, arsH, and arsH were detected in Pseudomonas putida strain VTw33 (DQ481482). arsH gene in bacteria was first reported from Vietnam for resistance and arsenite oxidase.	2-s2.0-85031994573	no		not about detections in aquatic environment
1270	7718	Barchiesi, F., Montalti, R., Castelli, P., Nicolini, D., Staffolani, S., Mocchegiani, F., Fiorentini, A., Manso, E., Vivarelli, M.	Carbapenem-Resistant Klebsiella pneumoniae influences the outcome of early infections in liver transplant recipients	2016	BMC Infectious Diseases	16	1	538	NA	NA	NA	3	10.1186/s12879-016-1876-5	https://www.scopus.com/inward/record.url?eid=2-s2.0-84991738535&partnerID=40&md5=cc29dd50e8b71cdeb65e502b3b094bbd	Article	NA	Scopus	Â© 2016 The Author(s).Background: Infections remain a leading cause of morbidity and mortality among liver transplant (LT) recipients. The aim of our study was to define the factors associated with outcome of early bacterial and fungal infections in a cohort of patients who underwent LT at the University Hospital of Ancona over a nine year period. Methods: All consecutive patients who underwent L…	Carbapenem-Resistant Klebsiella pneumoniae influences the outcome of early infections in liver transplant recipients <U+FFFD><U+FFFD> 2016 The Author(s).Background: Infections remain a leading cause of morbidity and mortality among liver transplant (LT) recipients. The aim of our study was to define the factors associated with outcome of early bacterial and fungal infections in a cohort of patien…	An early infection was defined as occurring in the first month post-transplantation.	2-s2.0-84991738535	No		not about detections in aquatic environment
110	6951	Korkut, S., Kilic, M.S.	Design of a mediated enzymatic fuel cell to generate power from renewable fuel sources	2016	Environmental Technology (United Kingdom)	37	2	NA	163	171	NA	1	10.1080/09593330.2015.1065007	https://www.scopus.com/inward/record.url?eid=2-s2.0-84948575595&partnerID=40&md5=54ff45723fe613bafcb70c4482d5c7d2	Article	NA	Scopus	Â© 2015 Taylor & Francis. The present work reported a compartment-less enzymatic fuel cell (EFC) based on newly synthesized Poly(pyrrole-2-carboxylic acid-co-3-thiophene acetic acid) film containing glucose oxidase and laccase effectively wired by p-benzoquinone incorporated into the copolymer structure. The resulting system generated a power density of 18.8 Î¼W/cm2 with 30 mM of glucose addition…	Design of a mediated enzymatic fuel cell to generate power from renewable fuel sources <U+FFFD><U+FFFD> 2015 Taylor & Francis. The present work reported a compartment-less enzymatic fuel cell (EFC) based on newly synthesized Poly(pyrrole-2-carboxylic acid-co-3-thiophene acetic acid) film containing glucose oxidase and laccase effectively wired by p-benzoquinone incorporated into the copolymer str…	An EFC for the first time was successfully operated in municipal wastewater which contained glycolytic substances to generate electrical energy with a power output of 3.3 <U+FFFD><U+FFFD>W/cm2.	2-s2.0-84948575595	No		not about detections in aquatic environment
1025	21632	Subramaniam, D.N., Mather, P.B.	Preliminary stabilisation of stormwater biofilters and loss of filter material	2016	Water Science and Technology	74	4	NA	787	795	NA	NA	10.2166/wst.2016.256	https://www.scopus.com/inward/record.url?eid=2-s2.0-84982102724&partnerID=40&md5=5fbe366480e0da69e2717819ebddfa0e	Article	NA	Scopus	Â© IWA Publishing 2016. Stabilisation affects performance of stormwater biofilters operating under intermittent wetting and drying, mainly due to wash-off of filter material. Understanding the dynamics of solids wash-off is crucial in designing stormwater biofilters. The current study analysed the dynamics of solids wash-off in stormwater biofilters and quantified the loss of solids from the filt…	Preliminary stabilisation of stormwater biofilters and loss of filter material <U+FFFD><U+FFFD> IWA Publishing 2016. Stabilisation affects performance of stormwater biofilters operating under intermittent wetting and drying, mainly due to wash-off of filter material. Understanding the dynamics of solids wash-off is crucial in designing stormwater biofilters. The current study analysed the dynamic…	An empirical model fitted to the data showed that preliminary stabilisation of a filter occurs in the first three events, during which almost 25% of fines are lost from the filter.	2-s2.0-84982102724	No		not about detections in aquatic environment
1313	4849	Gallardo, A.H.	Groundwater exploration for rural water supply in an arid region of southern Argentina	2016	Geosciences (Switzerland)	6	2	28	NA	NA	NA	1	10.3390/geosciences6020028	https://www.scopus.com/inward/record.url?eid=2-s2.0-84993945196&partnerID=40&md5=a709de7e328bd62b71f1ce1aac1ee823	Article	Open Access	Scopus	Â© 2016 by the authors; licensee MDPI, Basel, Switzerland. Climate change has led to an increase in extreme weather events and desertification of vast areas of southern Argentina. Water shortages are a major concern, and this problem is expected to be exacerbated in the future. An exploration program was undertaken to investigate the groundwater occurrence in areas of the Chubut River basin in or…	Groundwater exploration for rural water supply in an arid region of southern Argentina <U+FFFD><U+FFFD> 2016 by the authors; licensee MDPI, Basel, Switzerland. Climate change has led to an increase in extreme weather events and desertification of vast areas of southern Argentina. Water shortages are a major concern, and this problem is expected to be exacerbated in the future. An exploration prog…	An exploration program was undertaken to investigate the groundwater occurrence in areas of the Chubut River basin in order to provide new supply options for pastoral farming.	2-s2.0-84993945196	no		not about detections in aquatic environment
1523	16248	Petrie, B., Proctor, K., Youdan, J., Barden, R., Kasprzyk-Hordern, B.	Critical evaluation of monitoring strategy for the multi-residue determination of 90 chiral and achiral micropollutants in effluent wastewater	2017	Science of the Total Environment	579	NA	NA	569	578	NA	7	10.1016/j.scitotenv.2016.11.059	https://www.scopus.com/inward/record.url?eid=2-s2.0-85006856629&partnerID=40&md5=639f8c7b41d76d613bb87e06da6bd2d0	Article	Open Access	Scopus	Â© 2016 British Geological Survey, NERCIt is essential to monitor the release of organic micropollutants from wastewater treatment plants (WWTPs) for developing environmental risk assessment and assessing compliance with legislative regulation. In this study the impact of sampling strategy on the quantitative determination of micropollutants in effluent wastewater was investigated. An extended li…	Critical evaluation of monitoring strategy for the multi-residue determination of 90 chiral and achiral micropollutants in effluent wastewater <U+FFFD><U+FFFD> 2016 British Geological Survey, NERCIt is essential to monitor the release of organic micropollutants from wastewater treatment plants (WWTPs) for developing environmental risk assessment and assessing compliance with legislative regulatio…	An extended list of 90 chiral and achiral micropollutants representing a broad range of biological and physico-chemical properties were studied simultaneously for the first time.	2-s2.0-85006856629	No		not first detection (but first simultaneous detection)
3208	13337	Zhao, J., Quan, C., Jin, L., Chen, M.	Production, detection and application perspectives of quorum sensing autoinducer-2 in bacteria	2018	Journal of Biotechnology	268	NA	NA	53	60	NA	NA	10.1016/j.jbiotec.2018.01.009	https://www.scopus.com/inward/record.url?eid=2-s2.0-85041280798&partnerID=40&md5=2c4484da25a72234248335811d6d6f12	Review	NA	Scopus	Â© 2018 Elsevier B.V. Autoinducer-2 (AI-2) is a major signal molecule in bacterial quorum sensing (QS) besides N-acyl homoserine lactones (AHLs or AI-1). AI-2 mediated QS pathways have been proved to regulate gene expression and physiological behaviors of bacteria in either intraspecies or interspecies communication. Recent reviews have mainly summarized AI-2 structures, AI-2 mediated QS pathways…	Production, detection and application perspectives of quorum sensing autoinducer-2 in bacteria <U+FFFD><U+FFFD> 2018 Elsevier B.V. Autoinducer-2 (AI-2) is a major signal molecule in bacterial quorum sensing (QS) besides N-acyl homoserine lactones (AHLs or AI-1). AI-2 mediated QS pathways have been proved to regulate gene expression and physiological behaviors of bacteria in either intraspecies or…	An in-depth understanding of mechanisms and features of various detection methods may facilitate development of new technologies aimed at signal molecule detection.	2-s2.0-85041280798	No		not about detections in aquatic environment
1318	16476	Pereira, F.B., Luque, J.L.	An integrated phylogenetic analysis on ascaridoid nematodes (Anisakidae, Raphidascarididae), including further description and intraspecific variations of Raphidascaris (Sprentascaris) lanfrediae in freshwater fishes from Brazil	2017	Parasitology International	66	1	NA	898	904	NA	3	10.1016/j.parint.2016.10.012	https://www.scopus.com/inward/record.url?eid=2-s2.0-84993978015&partnerID=40&md5=ee2c8199e6b665388e424f11a8b77257	Article	NA	Scopus	Â© 2016 Elsevier Ireland LtdGenetic and morphological variations in two component populations of Raphidascaris (Sprentascaris) lanfrediae collected in the intestine of Geophagus argyrosticus and G. proximus (Cichlidae) from States of ParÃ¡ and AmapÃ¡, Brazil, respectively, were explored for the first time. A phylogenetic study including two genes (18S and 28S of the rDNA) plus morphological and l…	An integrated phylogenetic analysis on ascaridoid nematodes (Anisakidae, Raphidascarididae), including further description and intraspecific variations of Raphidascaris (Sprentascaris) lanfrediae in freshwater fishes from Brazil <U+FFFD><U+FFFD> 2016 Elsevier Ireland LtdGenetic and morphological variations in two component populations of Raphidascaris (Sprentascaris) lanfrediae collected in the i…	An integrated phylogenetic analysis on ascaridoid nematodes (Anisakidae, Raphidascarididae), including further description and intraspecific variations of Raphidascaris (Sprentascaris) lanfrediae in freshwater fishes from Brazil <U+FFFD><U+FFFD> 2016 Elsevier Ireland LtdGenetic and morphological variations in two component populations of Raphidascaris (Sprentascaris) lanfrediae collected in the i…	2-s2.0-84993978015	No		not about detections in aquatic environment
1188	17915	Criado-Fornelio, A., VerdÃº-ExpÃ³sito, C., Martin-PÃ©rez, T., Heredero-Bermejo, I., PÃ©rez-Serrano, J., GuÃ rdia-Valle, L., Panisello-Panisello, M.	A survey for gregarines (Protozoa: Apicomplexa) in arthropods in Spain	2017	Parasitology Research	116	1	NA	99	110	NA	1	10.1007/s00436-016-5266-0	https://www.scopus.com/inward/record.url?eid=2-s2.0-84989182975&partnerID=40&md5=5e8c5a19ae5dba76a730d7285dc39667	Article	NA	Scopus	Â© 2016, Springer-Verlag Berlin Heidelberg. Gregarines thrive in the digestive tract of arthropods and may be deleterious to their hosts, especially when present in high densities. The impact of parasites on these invertebrates may affect both the ecosystem equilibrium and human economic activities. However, information available on gregarines in Spain is limited. Therefore, a microscopic study o…	A survey for gregarines (Protozoa: Apicomplexa) in arthropods in Spain <U+FFFD><U+FFFD> 2016, Springer-Verlag Berlin Heidelberg. Gregarines thrive in the digestive tract of arthropods and may be deleterious to their hosts, especially when present in high densities. The impact of parasites on these invertebrates may affect both the ecosystem equilibrium and human economic activities. However, info…	An undescribed Gregarina sp. (76 % prevalence) was observed for the first time in freshwater decapod crustaceans.	2-s2.0-84989182975	No		new detection in biota
[truncated: 3,717 more rows]

## Sheet: Unique EIDS
EID	Signal Y/N?	MB/CH
2-s2.0-84982142867	yes	CH
2-s2.0-85047622560	yes	CH
2-s2.0-85046810004	yes	MB
2-s2.0-84959189504	yes	CH
2-s2.0-84978474550	yes	MB
2-s2.0-85026727146	yes	MB
2-s2.0-85019898567	Yes	CH
2-s2.0-85009851694	Yes	CH
2-s2.0-85011841005	Yes	MB
2-s2.0-85013082893	yes	MB
2-s2.0-84997496982	Yes	MB
2-s2.0-84975906859	yes	CH
2-s2.0-85040090070	yes	CH
2-s2.0-85028995683	yes	CH
2-s2.0-85021281637	Yes	CH
2-s2.0-85012886527	yes	MB
2-s2.0-85038208304	Yes	CH
2-s2.0-84964689347	yes	CH
2-s2.0-85018997603	yes	MB
2-s2.0-85012273901	Yes	CH
[truncated: 339 more rows]
